# Supplementary material for: Transition-metal free cyano 1,3 migration of unsaturated cyanohydrins
Source: Royal Society of Chemistry journal article supplement (doi:10.1039/d1qo00181g), 2021-01-01

## Transition-metal free cyano 1,3 migration of unsaturated cyanohydrins

Jing Tao, Ting-Ting Yang, Qing-Hua Li\*, and Tang-Lin Liu\*

School of Chemistry and Chemical Engineering, Southwest University, Chongqing 400715, China.

E-mail: liuschop@swu.edu.cn, liqinghua@swu.edu.cn

|                                                                                                                                               |    |
|-----------------------------------------------------------------------------------------------------------------------------------------------|----|
| I General information .....                                                                                                                   | 2  |
| II General Procedure for preparation of product from unsaturated cyanohydrins and the transformation of functional groups of product 2a ..... | 2  |
| III The mechanism study .....                                                                                                                 | 4  |
| IV Characterization of products .....                                                                                                         | 7  |
| V References .....                                                                                                                            | 25 |
| VI NMR spectra of the products .....                                                                                                          | 27 |

## I General information

All reactions were maintained under a nitrogen atmosphere unless otherwise stated. Commercially available reagents were used without further purification. Solvents including: Toluene, TBME, *p*-xylene, *o*-xylene and THF were dried with sodium and degassed via liquid nitrogen. Other dried solvents were directly used from purchased.  $^1\text{H}$  and  $^{13}\text{C}$  NMR spectra were recorded on a Bruker 14A04336 (600 MHz) spectrometer. Chemical shifts were reported in parts per million (ppm), and the residual solvent peak was used as an internal reference: proton (chloroform  $\delta$  7.26), carbon (chloroform  $\delta$  77.0) or tetramethylsilane (TMS  $\delta$  0.00) was used as a reference. Data are reported as follows: chemical shift, multiplicity (s = singlet, d = doublet, t = triplet, dd = doublet of doublets, m = multiplet), coupling constants (Hz) and integration. Coupling constants were reported in Hertz (Hz). High resolution mass spectra (HRMS) were recorded on a Bruker 19A01643 Q-TOF LC/MS with Electron Spray Ionization (ESI) resource. For thin layer chromatography (TLC), and compounds were visualized with a UV light at 254 nm. Further visualization was achieved by staining with 2,4-dinitrophenylhydrazine, or potassium permanganate solution followed by heating using a heat gun. The starting material unsaturated cyanohydrins were prepared by the addition of TMSCN to ketones according to the reported procedures.<sup>[1,2]</sup>

## II General Procedure for preparation of product from unsaturated cyanohydrins and the transformation of functional groups of product 2a

**Condition a:** To a vial equipped with a dried stir bar was added unsaturated cyanohydrins (0.1 mmol), DBU (20 mol%) and *o*-xylene (1 mL) in the glovebox. The reaction mixture was taken outside the glovebox and allowed to stir at room temperature for 20 hours. The crude reaction mixture was concentrated under reduced pressure and directly purified by silica gel chromatography to give pure products.

**Condition b:** To a vial equipped with a dried stir bar was added unsaturated cyanohydrins (0.1 mmol), DBU (40 mol%) and *o*-xylene (1 mL) in the glovebox. The reaction mixture was taken outside the glovebox and allowed to stir at 65 °C for 20 hours. The crude reaction mixture was concentrated under reduced pressure and directly purified by silica gel chromatography to give pure products.

**Table S1.** Table Condition Screening for cyano 1,3-migration<sup>a</sup>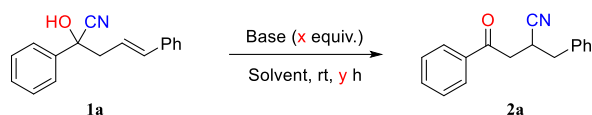

| entry | temp. (°C) | Base   | x    | Solvent          | Yield (%) <sup>b</sup> |
|-------|------------|--------|------|------------------|------------------------|
| 1     | 120        | DBU    | 1    | Toluene          | 53                     |
| 2     | 100        | DBU    | 1    | Toluene          | 60                     |
| 3     | 80         | DBU    | 1    | Toluene          | 60                     |
| 4     | 60         | DBU    | 1    | Toluene          | 66                     |
| 5     | 40         | DBU    | 1    | Toluene          | 62                     |
| 6     | rt         | DBU    | 1    | Toluene          | 60                     |
| 7     | rt         | DBU    | 0.4  | Toluene          | 66                     |
| 8     | rt         | DBU    | 0.2  | Toluene          | 69                     |
| 9     | rt         | DBU    | 0.1  | Toluene          | 24                     |
| 10    | rt         | DBU    | 0.20 | DCE              | 36                     |
| 12    | rt         | DBU    | 0.20 | TBME             | 61                     |
| 13    | rt         | DBU    | 0.20 | Hexane           | 56                     |
| 14    | rt         | DBU    | 0.20 | <i>p</i> -Xylene | 71                     |
| 16    | rt         | DBU    | 0.20 | <i>o</i> -Xylene | 81                     |
| 17    | rt         | DBU    | 0.20 | DMF              | 41                     |
| 18    | rt         | DBU    | 0.20 | THF              | 36                     |
| 19    | rt         | DMAP   | 0.20 | <i>o</i> -Xylene | 0                      |
| 20    | rt         | DABCO  | 0.20 | <i>o</i> -Xylene | 0                      |
| 21    | 120        | NaOH   | 1    | Toluene          | 0                      |
| 22    | 120        | KOH    | 1    | Toluene          | 0                      |
| 23    | 120        | LiOH   | 1    | Toluene          | 0                      |
| 24    | 120        | KOt-Bu | 1    | Toluene          | 0                      |
| 25    | rt         | TEA    | 0.20 | <i>o</i> -Xylene | trace                  |
| 26    | rt         | TMG    | 0.20 | <i>o</i> -Xylene | trace                  |

<sup>a</sup> The reaction was carried out with 0.1 mmol of 1a and 20 mol% base in 1 mL of solvent at room temperature for 18 h. <sup>b</sup> Isolated yield. DBU = 1,8-Diazabicyclo [5.4.0] undec-7-ene, DMAP = 4-Dim-ethylaminopyridine, DABCO = 1,4-Diazabicyclo[2.2.2]octane, TEA = Triethylamine, TMG= 1,1,3,3-Tetramethylguanidine.

**The Scale-up reaction c:** To a vial equipped with a dried stir bar was added unsaturated cyanohydrins (3.6 mmol), DBU (20 mol%) and *o*-xylene (36 mL) in the glovebox. The reaction mixture was taken outside the glovebox and allowed to stir at room temperature for 20 hours. The crude reaction mixture was concentrated under reduced pressure and directly purified by silica gel chromatography to give pure products.

#### The general procedure of synthetic transformations of the product

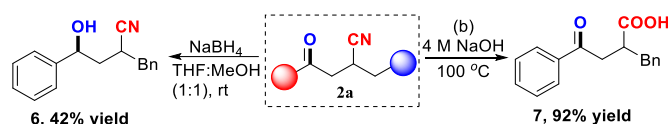

**Figure S1** the transformation of functional groups of product **2a**.

**the general procedure synthesis of 6<sup>[3]</sup>:** A 25 mL round bottle flask equipped with a dried stir bar was added **2a** (1 mmol, 250 mg, 1.0 equiv.) and the mixed solvents of THF and CH<sub>3</sub>OH (2 mL, 1:1). After **2a** was complete solvent, NaBH<sub>4</sub> (2 mmol, 76 mg) was added at 0 °C. The reaction temperature was allowed to stirring at room temperature. One hour later, the reaction was quenched by saturated NH<sub>4</sub>Cl aqueous. The aqueous was extracted with EA (5 mL×2). The organic layer was combined and dried with Na<sub>2</sub>SO<sub>4</sub>. Then concentrated under reduced pressure and directly purified by silica gel chromatography to give pure products **5o** in 42% yields.

**the general procedure synthesis of 7<sup>[4]</sup>:** A 25 ml round bottle flask equipped with a dried stir bar was added **2a** (1 mmol, 250 mg, 1.0 equiv.), and 5 mL of 4 M NaOH (aq) was added at room temperature. Then, the reaction mixture was refluxed at 100 °C for 4 hours. After the reaction finished, the mixture was cooled to room temperature, and acidify with HCl until the pH = 1~2. The product of **5p** was precipitated out, filtered and dried, to give white powder with a yield of 92% yield without further purification.

### III The mechanism study

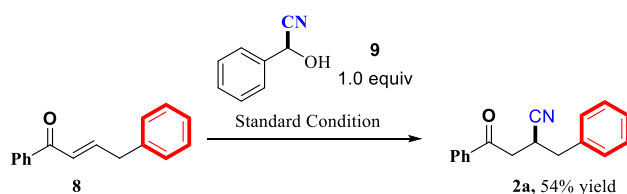

#### The mechanism study of experiment A

**Experimental A:** To a vial equipped with a dried stir bar was added  $\alpha,\beta$ -unsaturated ketone (**8**, 0.1 mmol), benzaldehyde cyanohydrin (**9**, 0.1 mmol), DBU (3.2  $\mu$ L), anhydrous *o*-xylene (1 mL) in the glovebox. After then, the reaction mixture was allowed to stir at room temperature for 20 hours. The products of **2a**

was isolated with 54% yields, which shows that  $\alpha,\beta$ -unsaturated ketone **8** was an intermediate for the cyano migration.

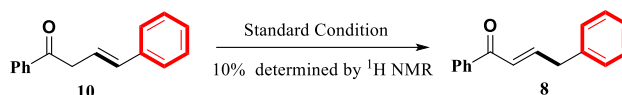

### The mechanism study of experiment B

Then experiment **B**: To a vial equipped with a dried stir bar was added  $\beta,\gamma$ -Unsaturated ketone **10**, DBU (3.2  $\mu\text{L}$ ), anhydrous *o*-xylene (1 mL) in the glovebox. After then, the reaction mixture was allowed to stir at room temperature for 20 hours. The crude reaction mixture was concentrated under reduced pressure, and quick filtrate through a short silicagel column. Then the crude products were analysis via  $^1\text{H}$  NMR, which shown 10% conversion of  $\beta,\gamma$ -Unsaturated ketone **10** transformation into  $\alpha,\beta$ -Unsaturated ketone **8**. It is consistent with our hypothesis, and further illustrated  $\alpha,\beta$ -unsaturated ketone **8** was an intermediate in this catalytic system.

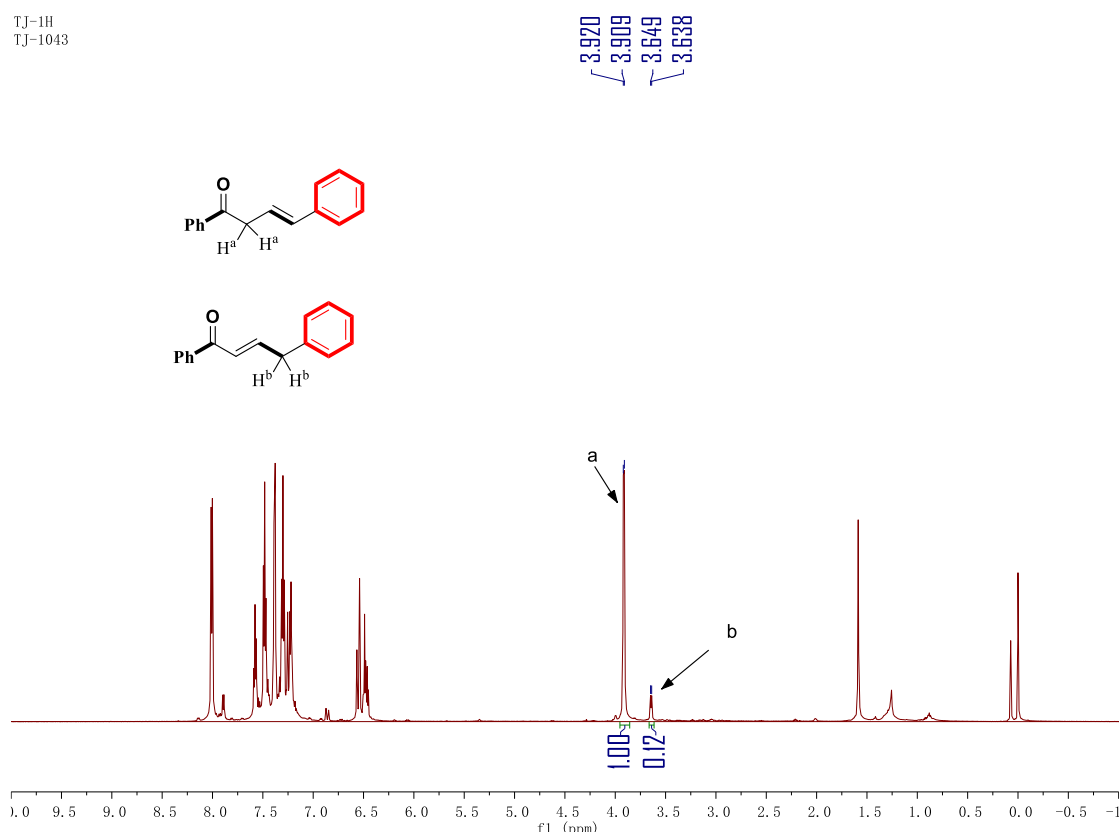

### The $^1\text{H}$ NMR of experiment B

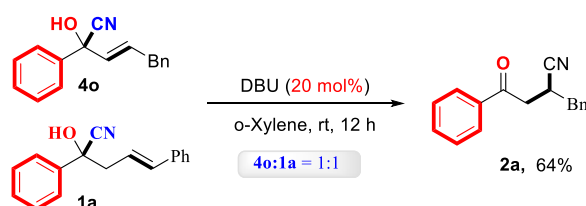

### The mechanism study of experiment C

Experimental **C**: To a vial equipped with a dried stir bar was added  $\alpha,\beta$ -unsaturated cyanohydrin (**4o**, 0.1

mmol),  $\beta,\gamma$ -unsaturated cyanohydrin (**1a**, 0.1 mmol), DBU (3.2  $\mu\text{L}$ ), anhydrous *o*-xylene (1 mL) in the glovebox. After then, the reaction mixture was allowed to stir at room temperature for 20 hours. The total yield of **2a** was obtained in 64%. And the result of this experimental show that DBU played a role as base involved in the reaction, which lead the total yield reduced.

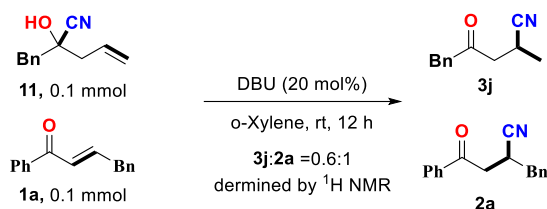

### The mechanism study of experiment D

**Experimental D:** To a vial equipped with a dried stir bar was added  $\beta,\gamma$ -unsaturated cyanohydrin (**11**, 0.1 mmol),  $\beta,\gamma$ -unsaturated cyanohydrin (**1a**, 0.1 mmol), DBU (3.2  $\mu\text{L}$ ), anhydrous *o*-xylene (1 mL) in the glovebox. After then, the reaction mixture was allowed to stir at room temperature for 20 hours. The crude reaction mixture was concentrated under reduced pressure, and analysis via  $^1\text{H}$  NMR. The corresponding products **3j** and **2a** with the ratio of 0.6:1 were observed in the spectrum, which was demonstrate that the  $\text{CN}^-$  was free state.

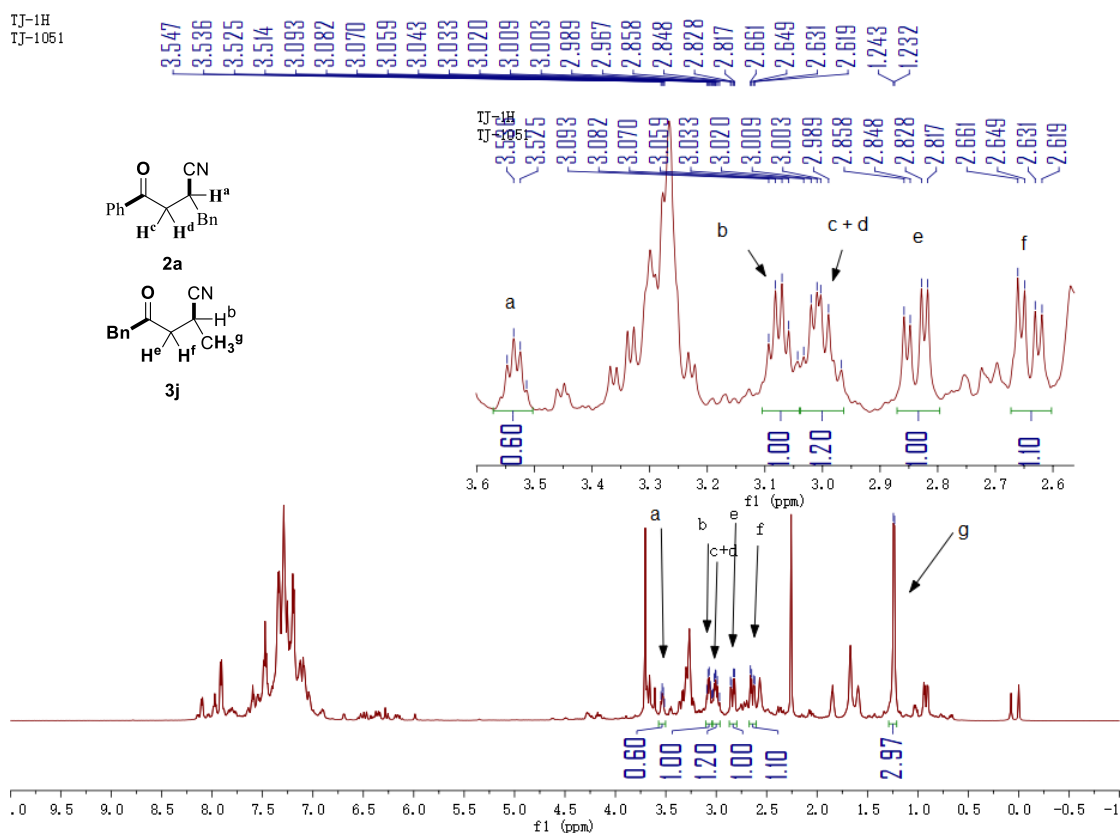

The  $^1\text{H}$  NMR of experiment D

## IV Characterization of products

### 2-Benzyl-4-oxo-4-phenylbutanenitrile (2a)<sup>[5]</sup>

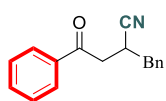

The title compound 2a was prepared according to the general procedure as described, silica gel flash column chromatography was performed hexanes and ethyl acetate (10:1) ( $R_f$  = 0.30 in hexane: ethyl acetate = 10:1) resulting in a white solid in 81% yield.

**<sup>1</sup>H NMR** (600 MHz, CDCl<sub>3</sub>)  $\delta$  7.91 (d,  $J$  = 7.8 Hz, 2H), 7.60 (t,  $J$  = 7.2 Hz, 1H), 7.48 (t,  $J$  = 7.5 Hz, 2H), 7.35-7.32 (m, 2H), 7.22-7.25 (m, 3H), 3.56-3.52 (m, 1H), 3.35 (dd,  $J$  = 18.0 Hz, 6.0 Hz, 1H), 3.25 (dd,  $J$  = 18.0 Hz, 6.0 Hz, 1H), 3.04-3.97 (m, 2H).

**<sup>13</sup>C NMR** (151 MHz, CDCl<sub>3</sub>)  $\delta$  195.2, 136.4, 135.9, 133.8, 129.1, 128.8, 128.0, 127.4, 121.3, 39.7, 37.5, 28.2.

**HRMS(ESI)**  $m/z$ : C<sub>17</sub>H<sub>16</sub>NO, [M+H]<sup>+</sup>, Calcd: 250.1265, Found: 250.1226.

**IR (KBr, cm<sup>-1</sup>)** 2964, 2926, 2245, 1685, 1596, 1450, 1265, 1218, 1076, 1002, 986, 747, 700, 685, 580, 486.

### 2-Benzyl-4-(4-chlorophenyl)-4-oxobutanenitrile (2b)

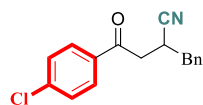

The title compound 2b was prepared according to the general procedure as described, silica gel flash column chromatography was performed hexanes and ethyl acetate (10:1) ( $R_f$  = 0.30 in hexane: ethyl acetate = 10:1) resulting in a white solid in 81% yield.

**<sup>1</sup>H NMR** (600 MHz, CDCl<sub>3</sub>)  $\delta$  7.85 (d,  $J$  = 7.8 Hz, 2H), 7.46 (d,  $J$  = 7.8 Hz, 2H), 7.35 (t,  $J$  = 7.2 Hz, 2H), 7.31-7.24 (m, 3H), 3.55-3.50 (m, 1H), 3.32 (dd,  $J$  = 18.0 Hz, 6.6 Hz, 1H), 3.20 (dd,  $J$  = 17.2 Hz, 6.6 Hz, 1H), 3.06-2.95 (m, 2H).

**<sup>13</sup>C NMR** (151 MHz, CDCl<sub>3</sub>)  $\delta$  194.0, 140.4, 136.2, 134.2, 129.4, 129.2, 129.1, 128.9, 127.5, 121.2, 39.7, 37.5, 28.1.

**HRMS(ESI)**  $m/z$ : C<sub>17</sub>H<sub>14</sub>ClNNaO, [M+Na]<sup>+</sup>, Calcd: 306.0656, Found: 306.0655.

**IR (KBr, cm<sup>-1</sup>)** 2924, 2241, 1687, 1587, 1453, 1399, 1264, 1216, 1093, 1033, 827, 748, 699, 576.

### 2-Benzyl-4-(4-fluorophenyl)-4-oxobutanenitrile (2c)

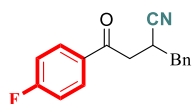

The title compound 2c was prepared according to the general procedure as described, silica gel flash column chromatography was performed hexanes and ethyl acetate (10:1) ( $R_f$  = 0.30 in hexane: ethyl acetate = 10:1) resulting in a white solid in 86% yield.

**<sup>1</sup>H NMR** (600 MHz, CDCl<sub>3</sub>)  $\delta$  7.95-7.93 (m, 2H), 7.34 (t,  $J$  = 7.2 Hz, 2H), 7.30-7.25 (m, 3H), 7.16-7.13 (m, 2H), 3.54-3.52 (m, 1H), 3.32 (dd,  $J$  = 18.0 Hz, 6.6 Hz, 1H), 3.20 (dd,  $J$  = 18.0 Hz, 6.6 Hz, 1H), 3.05-2.98 (m, 2H).

**<sup>13</sup>C NMR** (151 MHz, CDCl<sub>3</sub>)  $\delta$  193.6, 166.1 (d,  $J$  = 256.3 Hz), 136.2, 132.4, 130.7 (d,  $J$  = 9.5 Hz), 129.1,

128.8, 127.5, 121.2, 116.1 (d,  $J = 22.0$  Hz), 115.9, 39.6, 37.5, 28.1.

$^{19}\text{F}$  NMR (376 MHz,  $\text{CDCl}_3$ )  $\delta$  -103.53.

HRMS(ESI)  $m/z$ :  $\text{C}_{17}\text{H}_{15}\text{FNO}$ ,  $[\text{M}+\text{H}]^+$ , Calcd: 268.1132, Found: 268.1131.

IR (KBr,  $\text{cm}^{-1}$ ) 2925, 2245, 1686, 1579, 1505, 1237, 1222, 1156, 834, 635, 485.

### 2-Benzyl-4-oxo-4-(4-(trifluoromethyl)phenyl)butanenitrile (2d)

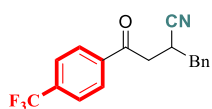

The title compound **2d** was prepared according to the general procedure as described, silica gel flash column chromatography was performed hexanes and ethyl acetate (10:1) ( $R_f = 0.30$  in hexane: ethyl acetate = 10:1) resulting in a white solid in 76% yield.

$^1\text{H}$  NMR (600 MHz,  $\text{CDCl}_3$ )  $\delta$  8.02 (d,  $J = 7.8$  Hz, 2H), 7.75 (d,  $J = 8.4$  Hz, 2H), 7.35 (t,  $J = 7.2$  Hz, 2H), 7.32-7.24 (m, 3H), 3.56-3.52 (m, 1H), 3.37 (dd,  $J = 18.0$  Hz, 6.6 Hz, 1H), 3.25 (dd,  $J = 18.0$  Hz, 6.6 Hz, 1H), 3.03 (d,  $J = 7.2$  Hz, 2H).

$^{13}\text{C}$  NMR (151 MHz,  $\text{CDCl}_3$ )  $\delta$  194.3, 138.5, 136.1, 135.2 (q,  $J = 32.9$  Hz), 129.1, 128.9, 128.3, 127.6, 125.9 (q,  $J = 3.7$  Hz), 123.4 (q,  $J = 272.8$  Hz), 121.0, 40.0, 37.4, 28.0.

$^{19}\text{F}$  NMR (376 MHz,  $\text{CDCl}_3$ )  $\delta$  -63.24.

HRMS(ESI)  $m/z$ :  $\text{C}_{18}\text{H}_{15}\text{F}_3\text{NO}$ ,  $[\text{M}+\text{H}]^+$ , Calcd: 318.1100, Found: 318.1099.

IR (KBr,  $\text{cm}^{-1}$ ) 2959, 2247, 1692, 1330, 1109, 845, 832, 742, 701.

### 2-Benzyl-4-oxo-4-(p-tolyl)butanenitrile (2e)

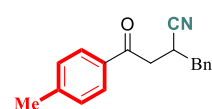

The title compound **2e** was prepared according to the general procedure as described, silica gel flash column chromatography was performed hexanes and ethyl acetate (10:1) ( $R_f = 0.30$  in hexane: ethyl acetate = 10:1) resulting in a yellow oil in 76% yield.

$^1\text{H}$  NMR (600 MHz,  $\text{CDCl}_3$ )  $\delta$  7.82 (d,  $J = 6.6$  Hz, 2H), 7.35-7.32 (m, 2H), 7.29-7.25 (m, 5H), 3.56-3.51 (m, 1H), 3.32 (dd,  $J = 18.0$  Hz, 6.6 Hz, 1H), 3.22 (dd,  $J = 18.0$  Hz, 6.6 Hz, 1H), 3.04-2.95 (m, 2H), 2.42 (s, 3H).

$^{13}\text{C}$  NMR (151 MHz,  $\text{CDCl}_3$ )  $\delta$  194.8, 144.8, 136.4, 133.5, 129.5, 129.2, 128.8, 128.1, 127.4, 121.4, 39.6, 37.5, 28.2, 21.6.

HRMS(ESI)  $m/z$ :  $\text{C}_{18}\text{H}_{18}\text{NO}$ ,  $[\text{M}+\text{H}]^+$ , Calcd: 264.1383, Found: 264.1381.

IR (KBr,  $\text{cm}^{-1}$ ) 2928, 2240, 1679, 1378, 1323, 1266, 1181, 1106, 816, 700.

### 2-Benzyl-4-(4-methoxyphenyl)-4-oxobutanenitrile (2f)

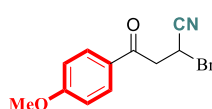

The title compound **2f** was prepared according to the general procedure as described, silica gel flash column chromatography was performed hexanes and ethyl acetate (10:1) ( $R_f = 0.30$  in hexane: ethyl acetate = 10:1) resulting in a white solid in 57% yield.

$^1\text{H}$  NMR (600 MHz,  $\text{CDCl}_3$ )  $\delta$  7.90 (d,  $J = 9.0$  Hz, 2H), 7.33 (d,  $J = 7.2$  Hz, 2H), 7.28-7.25 (m, 3H), 6.95 (d,  $J = 9.0$  Hz, 2H), 3.88 (s, 3H), 3.56-3.52 (m, 1H), 3.30 (dd,  $J = 17.4$  Hz, 6.6 Hz, 1H), 3.20 (dd,  $J = 18.0$



Hz, 7.2 Hz, 1H), 3.03 (dd,  $J = 13.2$  Hz, 6.0 Hz, 1H), 2.97 (dd,  $J = 13.8$  Hz, 8.4 Hz, 1H).

$^{13}\text{C}$  NMR (151 MHz,  $\text{CDCl}_3$ )  $\delta$  193.6, 164.1, 136.5, 130.3, 129.2, 129.0, 128.8, 127.4, 121.5, 114.0, 55.5, 39.3, 37.5, 28.3.

HRMS(ESI)  $m/z$ :  $\text{C}_{18}\text{H}_{18}\text{NO}_2$ ,  $[\text{M}+\text{H}]^+$ , Calcd: 280.1332, Found: 280.1328.

IR (KBr,  $\text{cm}^{-1}$ ) 2862, 2242, 1684, 1592, 1453, 1431, 1267, 1043, 787, 766, 622.

### 2-Benzyl-4-(2-chlorophenyl)-4-oxobutanenitrile (2g)

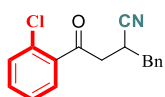

The title compound **2g** was prepared according to the general procedure as described, silica gel flash column chromatography was performed hexanes and ethyl acetate (10:1) ( $R_f = 0.30$  in hexane: ethyl acetate = 10:1) resulting in a yellow oil in 86% yield.

$^1\text{H}$  NMR (600 MHz,  $\text{CDCl}_3$ )  $\delta$  7.51 (d,  $J = 7.8$  Hz, 1H), 7.43 (d,  $J = 4.2$  Hz, 2H), 7.36-7.33 (m, 3H), 7.30-7.27 (m, 3H), 3.53-3.47 (m, 1H), 3.37 (dd,  $J = 18.0$  Hz, 7.2 Hz, 1H), 3.27 (dd,  $J = 18.0$  Hz, 6.0 Hz, 1H), 3.05-2.98 (m, 2H).

$^{13}\text{C}$  NMR (151 MHz,  $\text{CDCl}_3$ )  $\delta$  198.1, 137.7, 136.2, 132.6, 131.3, 130.8, 129.4, 129.1, 128.8, 127.5, 127.1, 121.0, 44.0, 37.5, 28.5.

HRMS(ESI)  $m/z$ :  $\text{C}_{17}\text{H}_{15}\text{ClNO}$ ,  $[\text{M}+\text{H}]^+$ , Calcd: 284.0837, Found: 284.0835.

IR (KBr,  $\text{cm}^{-1}$ ) 2928, 2242, 1700, 1589, 1433, 1213, 1162, 755, 701.

### 2-Benzyl-4-oxo-4-(o-tolyl)butanenitrile (2h)

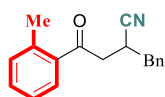

The title compound **2h** was prepared according to the general procedure as described, silica gel flash column chromatography was performed hexanes and ethyl acetate (10:1) ( $R_f = 0.30$  in hexane: ethyl acetate = 10:1) resulting in a yellow oil in 88% yield.

$^1\text{H}$  NMR (600 MHz,  $\text{CDCl}_3$ )  $\delta$  7.50 (d,  $J = 7.8$  Hz, 1H), 7.33 (t,  $J = 7.3$  Hz, 1H), 7.27 (t,  $J = 7.8$  Hz, 2H), 7.22-7.17 (m, 5H), 3.46-3.42 (m, 1H), 3.21 (dd,  $J = 17.4$  Hz, 6.6 Hz, 1H), 3.09 (dd,  $J = 17.4$  Hz, 6.6 Hz, 1H), 2.93-2.91 (m, 2H), 2.45 (s, 3H).

$^{13}\text{C}$  NMR (151 MHz,  $\text{CDCl}_3$ )  $\delta$  198.5, 138.9, 136.3, 136.3, 132.3, 132.1, 129.1, 128.8, 128.5, 127.4, 125.8, 121.4, 42.3, 37.6, 28.3, 21.4.

HRMS(ESI)  $m/z$ :  $\text{C}_{18}\text{H}_{18}\text{NO}$ ,  $[\text{M}+\text{H}]^+$ , Calcd: 264.1383, Found: 264.1382.

IR (KBr,  $\text{cm}^{-1}$ ) 2926, 2242, 1686, 1409, 1271, 976, 757, 702.

### 2-Benzyl-4-(3-chlorophenyl)-4-oxobutanenitrile (2i)

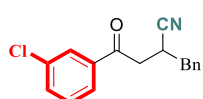

The title compound **2i** was prepared according to the general procedure as described, silica gel flash column chromatography was performed hexanes and ethyl acetate (10:1) ( $R_f = 0.30$  in hexane: ethyl acetate = 10:1) resulting in a yellow oil in 70% yield.

$^1\text{H}$  NMR (600 MHz,  $\text{CDCl}_3$ )  $\delta$  7.89 (s, 1H), 7.79 (d,  $J = 7.8$  Hz, 1H), 7.57 (d,  $J = 7.8$  Hz, 1H), 7.43 (t,  $J$

= 7.9 Hz, 1H), 7.36 (t,  $J$  = 7.2 Hz, 2H), 7.29 (m, 3H), 3.55-3.50 (m, 1H), 3.35-3.31 (dd,  $J$  = 18.0 Hz, 6.6 Hz, 1H), 3.21 (dd,  $J$  = 18.0 Hz, 6.6 Hz, 1H), 3.02 (d,  $J$  = 7.2 Hz, 2H).

$^{13}\text{C}$  NMR (151 MHz,  $\text{CDCl}_3$ )  $\delta$  194.0, 137.4, 136.1, 135.2, 133.7, 130.1, 129.1, 128.9, 128.1, 127.5, 126.0, 121.1, 39.8, 37.5, 28.1.

HRMS(ESI)  $m/z$ :  $\text{C}_{17}\text{H}_{15}\text{ClNO}$ ,  $[\text{M}+\text{H}]^+$ , Calcd: 284.0837, Found: 284.0836.

IR (KBr,  $\text{cm}^{-1}$ ) 2861, 2219, 1646, 1372, 1160, 1105, 1078, 759, 697.

## 2-Benzyl-4-oxo-4-(*m*-tolyl)butanenitrile (2j)

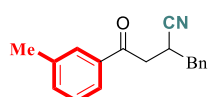

The title compound **2j** was prepared according to the general procedure as described, silica gel flash column chromatography was performed hexanes and ethyl acetate (10:1) ( $R_f$  = 0.30 in hexane: ethyl acetate = 10:1) resulting in a yellow oil in 85% yield.

$^1\text{H}$  NMR (600 MHz,  $\text{CDCl}_3$ )  $\delta$  7.81 (d,  $J$  = 7.8 Hz, 2H), 7.35-7.32 (m, 2H), 7.28-7.25 (m, 5H), 3.55-3.52 (m, 1H), 3.32 (dd,  $J$  = 18.0 Hz, 6.0 Hz, 1H), 3.22 (dd,  $J$  = 18.0 Hz, 7.2 Hz, 1H), 3.02 (dd,  $J$  = 13.8 Hz, 6.0 Hz, 1H), 2.97 (dd,  $J$  = 13.2 Hz, 7.8 Hz, 1H), 2.42 (s, 3H);

$^{13}\text{C}$  NMR (151 MHz,  $\text{CDCl}_3$ )  $\delta$  194.8, 144.8, 136.5, 133.5, 129.5, 129.2, 128.8, 128.1, 127.4, 121.5, 39.6, 37.6, 28.2, 21.7.

HRMS(ESI)  $m/z$ :  $\text{C}_{18}\text{H}_{18}\text{ClNO}$ ,  $[\text{M}+\text{H}]^+$ , Calcd: 264.1383, Found: 264.1382.

IR (KBr,  $\text{cm}^{-1}$ ) 2862, 2241, 1683, 1450, 1270, 1203, 1183, 786, 689.

## 2-Benzyl-4-(naphthalen-2-yl)-4-oxobutanenitrile (2k)

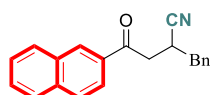

The title compound **2k** was prepared according to the general procedure as described, silica gel flash column chromatography was performed hexanes and ethyl acetate (10:1) ( $R_f$  = 0.30 in hexane: ethyl acetate = 10:1) resulting in a white solid in 87% yield.

$^1\text{H}$  NMR (600 MHz,  $\text{CDCl}_3$ )  $\delta$  8.40 (s, 1H), 8.97-7.94 (m, 2H), 7.91-7.87 (m, 2H), 7.63-7.62 (m, 1H), 7.57 (t,  $J$  = 7.2 Hz, 1H), 7.36-7.33 (m, 2H), 7.31-7.29 (m, 3H), 3.62-3.58 (m, 1H), 3.48 (dd,  $J$  = 17.2 Hz, 6.0 Hz, 1H), 3.39 (dd,  $J$  = 17.2 Hz, 6.6 Hz, 1H), 3.08-3.00 (m, 2H).

$^{13}\text{C}$  NMR (151 MHz,  $\text{CDCl}_3$ )  $\delta$  195.1, 136.4, 135.9, 133.2, 132.4, 129.9, 129.6, 129.2, 128.9, 128.8, 128.8, 127.8, 127.5, 127.0, 123.4, 121.4, 39.8, 37.5, 28.3.

HRMS(ESI)  $m/z$ :  $\text{C}_{21}\text{H}_{18}\text{NO}$ ,  $[\text{M}+\text{H}]^+$ , Calcd: 300.1383, Found: 300.1381.

IR (KBr,  $\text{cm}^{-1}$ ) 2924, 2244, 1677, 1451, 1275, 1263, 1184, 1122, 889, 766, 699, 494.

## 2-Benzyl-4-(3,5-dimethylphenyl)-4-oxobutanenitrile (2l)

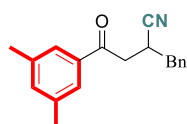

The title compound **2l** was prepared according to the general procedure as described, silica gel flash column chromatography was performed hexanes and ethyl acetate (10:1) ( $R_f$  = 0.30 in hexane: ethyl acetate = 10:1) resulting in a yellow oil in 77% yield.

**<sup>1</sup>H NMR** (600 MHz, CDCl<sub>3</sub>) δ 7.52 (s, 2H), 7.35-7.33 (m, 2H), 7.29-7.27 (m, 3H), 7.23 (s, 1H), 3.56-3.51 (m, 1H), 3.33 (dd, *J* = 18.0 Hz, 6.6 Hz, 1H), 3.23 (dd, *J* = 18.0 Hz, 6.0 Hz, 1H), 3.30-2.94 (m, 2H), 2.37 (s, 6H).

**<sup>13</sup>C NMR** (151 MHz, CDCl<sub>3</sub>) δ 195.6, 138.5, 136.5, 136.0, 135.4, 129.2, 128.8, 127.4, 125.8, 121.4, 39.8, 37.5, 28.2, 21.2.

**HRMS(ESI)** *m/z*: C<sub>19</sub>H<sub>20</sub>NO, [M+H]<sup>+</sup>, Calcd: 278.1539, Found: 278.1539.

**IR (KBr, cm<sup>-1</sup>)** 2921, 2241, 1682, 1646, 1603, 1449, 1358, 1301, 1206, 1185, 1159, 852, 754, 689.

### 2-Benzyl-4-oxopentanenitrile (**2m**)<sup>[6]</sup>

The title compound **2m** was prepared according to the general procedure as described, silica gel flash column chromatography was performed hexanes and ethyl acetate (10:1) (*R<sub>f</sub>* = 0.40 in hexane: ethyl acetate = 8:1) resulting in a yellow oil in 78% yield.

**<sup>1</sup>H NMR** (600 MHz, CDCl<sub>3</sub>) δ 7.34 (t, *J* = 6.6 Hz, 2H), 7.29 (t, *J* = 7.2 Hz, 1H), 7.24 (d, *J* = 6.6 Hz, 2H), 3.3-3.28 (m, 1H), 2.91 (d, *J* = 6.6 Hz, 2H), 2.81 (dd, *J* = 18.0 Hz, 6.6 Hz, 1H), 2.68 (dd, *J* = 18.0 Hz, 6.6 Hz, 1H), 2.17 (s, 3H).

**<sup>13</sup>C NMR** (151 MHz, CDCl<sub>3</sub>) δ 203.5, 136.2, 129.1, 128.8, 127.5, 121.1, 44.2, 37.3, 29.9, 27.7.

**HRMS(ESI)** *m/z*: C<sub>12</sub>H<sub>13</sub>NO, [M], Calcd: 188.1070, Found: 188.1070.

**IR (KBr, cm<sup>-1</sup>)** 3063, 2927, 2241, 1718, 1496, 1366, 1180, 1162, 747, 702.

### 2-Benzyl-5-methyl-4-oxohexanenitrile (**2n**)

The title compound **2n** was prepared according to the general procedure as described, silica gel flash column chromatography was performed hexanes and ethyl acetate (15:1) (*R<sub>f</sub>* = 0.30 in hexane: ethyl acetate = 15:1) resulting in a yellow oil in 62% yield.

**<sup>1</sup>H NMR** (600 MHz, CDCl<sub>3</sub>) δ 7.34 (t, *J* = 7.2 Hz, 2H), 7.29 (t, *J* = 7.5 Hz, 1H), 7.25 (t, *J* = 7.5 Hz, 2H), 3.35-3.31 (m, 1H), 2.91 (d, *J* = 7.2 Hz, 2H), 2.77 (dd, *J* = 18.0 Hz, 6.6 Hz, 1H), 2.63 (dd, *J* = 18.0 Hz, 6.6 Hz, 1H), 2.32-2.24 (m, 2H), 2.14 (m, 1H), 0.92 (t, *J* = 5.4 Hz, 6H).

**<sup>13</sup>C NMR** (151 MHz, CDCl<sub>3</sub>) δ 205.7, 136.3, 129.1, 128.8, 127.4, 121.2, 51.8, 44.0, 37.4, 27.7, 24.6, 22.4, 22.4.

**HRMS(ESI)** *m/z*: C<sub>15</sub>H<sub>19</sub>NNaO, [M+Na]<sup>+</sup> Calcd: 252.1359, Found: 252.1357.

2957, 2243, 1708, 1403, 1371, 1095, 1079, 960, 749, 710, 584.

**IR (KBr, cm<sup>-1</sup>)** 2957, 2243, 1708, 1403, 1371, 1095, 1079, 960, 749, 710, 584.

### 2-Benzyl-5,5-dimethyl-4-oxohexanenitrile (**2o**)

The title compound **2o** was prepared according to the general procedure as described, silica gel flash column chromatography was performed hexanes and ethyl acetate (15:1) (*R<sub>f</sub>* = 0.30

in hexane: ethyl acetate = 15:1) resulting in a yellow oil in 58% yield.

**<sup>1</sup>H NMR** (600 MHz, CDCl<sub>3</sub>) δ 7.34 (t, *J* = 7.2 Hz, 2H), 7.29 (d, *J* = 7.2 Hz, 1H), 7.26 (d, *J* = 9.0 Hz, 2H), 3.37-3.32 (m, 1H), 2.93-2.88 (m, 3H), 2.74 (dd, *J* = 18.0 Hz, 6.6 Hz, 1H), 1.15 (s, 9H).

**<sup>13</sup>C NMR** (151 MHz, CDCl<sub>3</sub>) δ 211.2, 136.4, 129.0, 128.8, 127.4, 121.4, 44.0, 38.2, 37.4, 28.1, 26.2.

**HRMS(ESI)** *m/z*: C<sub>15</sub>H<sub>19</sub>NNaO, [M+Na]<sup>+</sup>, Calcd: 252.1359, Found: 252.1357.

**IR (KBr, cm<sup>-1</sup>)** 2976, 2241, 1701, 1477, 1455, 1365, 1099, 1000, 879, 771, 738, 703.484.

## 2-(4-Chlorobenzyl)-4-oxo-4-phenylbutanenitrile (2p)

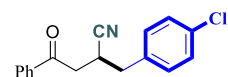

The title compound **2p** was prepared according to the general procedure as described, silica gel flash column chromatography was performed hexanes and ethyl acetate (10:1) (*R<sub>f</sub>* = 0.30 in hexane: ethyl acetate = 10:1) resulting in a white solid in 87% yield.

**<sup>1</sup>H NMR** (600 MHz, CDCl<sub>3</sub>) δ 7.92 (d, *J* = 7.2 Hz, 2H), 7.62 (t, *J* = 7.2 Hz, 1H), 7.49 (t, *J* = 7.8 Hz, 2H), 7.32 (d, *J* = 8.4 Hz, 2H), 7.24 (t, *J* = 12.6 Hz, 2H), 3.54-3.50 (m, 1H), 3.37 (dd, *J* = 18.0 Hz, 6.6 Hz, 1H), 3.26 (dd, *J* = 18.0 Hz, 7.2 Hz, 1H), 3.02 (dd, *J* = 13.8 Hz, 5.4 Hz, 1H), 2.93 (dd, *J* = 13.8 Hz, 8.4 Hz, 1H).

**<sup>13</sup>C NMR** (151 MHz, CDCl<sub>3</sub>) δ 195.0, 135.8, 134.8, 133.9, 133.5, 130.5, 129.0, 128.8, 128.0, 121.1, 39.7, 36.8, 28.2.

**HRMS(ESI)** *m/z*: C<sub>17</sub>H<sub>15</sub>ClNO, [M+H]<sup>+</sup>, Calcd: 284.0837; Found: 284.0834.

**IR (KBr, cm<sup>-1</sup>)** 2931, 2246, 1686, 1588, 1362, 1092, 829, 699, 699, 577, 484.

## 2-(4-Bromobenzyl)-4-oxo-4-phenylbutanenitrile (2q)

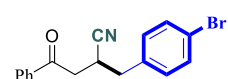

The title compound **2q** was prepared according to the general procedure as described, silica gel flash column chromatography was performed hexanes and ethyl acetate (10:1) (*R<sub>f</sub>* = 0.30 in hexane: ethyl acetate = 10:1) resulting in a white solid in 80% yield.

**<sup>1</sup>H NMR** (600 MHz, CDCl<sub>3</sub>) δ 7.92 (d, *J* = 7.8 Hz, 2H), 7.62 (t, *J* = 7.2 Hz, 1H), 7.50-7.46 (m, 4H), 7.17 (d, *J* = 7.8 Hz, 2H), 3.563-3.51 (m, 1H), 3.36 (dd, *J* = 18.0 Hz, 5.0 Hz, 1H), 3.25 (dd, *J* = 18.0 Hz, 7.2 Hz, 1H), 3.00 (dd, *J* = 13.8 Hz, 5.4 Hz, 1H), 2.92 (dd, *J* = 13.2 Hz, 8.4 Hz, 1H).

**<sup>13</sup>C NMR** (151 MHz, CDCl<sub>3</sub>) δ 195.0, 135.8, 135.4, 133.9, 132.0, 130.9, 128.9, 128.0, 121.5, 121.1, 39.7, 36.9, 28.1.

**HRMS(ESI)** *m/z*: C<sub>17</sub>H<sub>15</sub>BrNO, [M+H]<sup>+</sup>, Calcd: 328.0332, Found: 328.0329.

**IR (KBr, cm<sup>-1</sup>)** 2933, 2246, 1683, 1594, 1487, 1217, 1180, 1042, 987, 821, 751, 686, 642, 500.

## 2-(4-Fluorobenzyl)-4-oxo-4-phenylbutanenitrile (2r)

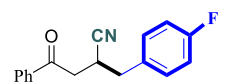

The title compound **2r** was prepared according to the general procedure as described, silica gel flash column chromatography was performed hexanes and ethyl acetate (10:1) (*R<sub>f</sub>* = 0.30 in hexane: ethyl acetate = 10:1) resulting in a white solid in 75% yield.

**<sup>1</sup>H NMR** (600 MHz, CDCl<sub>3</sub>) δ 7.93 (d, *J* = 7.2 Hz, 2H), 7.62 (t, *J* = 7.2 Hz, 1H), 7.49 (t, *J* = 7.8 Hz, 2H), 7.26 (t, *J* = 6.6 Hz, 2H), 7.03 (t, *J* = 9.0 Hz, 2H), 3.54-3.49 (m, 1H), 3.37 (dd, *J* = 18.0 Hz, 6.0 Hz, 1H), 3.26 (dd, *J* = 18.0 Hz, 6.6 Hz, 1H), 3.02 (dd, *J* = 14.4 Hz, 6.0 Hz, 1H), 2.94 (dd, *J* = 13.2 Hz, 8.4 Hz, 1H).  
**<sup>13</sup>C NMR** (151 MHz, CDCl<sub>3</sub>) δ 195.1, 161.4 (d, *J* = 246.2 Hz), 135.8, 133.9, 132.1, 130.7 (d, *J* = 8.0 Hz), 128.8, 128.0, 121.2, 115.7 (d, *J* = 21.1 Hz), 39.7, 36.7, 28.4.

**<sup>19</sup>F NMR** (376 MHz, CDCl<sub>3</sub>) δ -114.96.

**HRMS(ESI)** *m/z*: C<sub>17</sub>H<sub>15</sub>FNO, [M+H]<sup>+</sup>, Calcd: 268.1132, Found: 268.1130.

**IR (KBr, cm<sup>-1</sup>)** 2967, 2245, 1684, 1598, 1508, 1448, 1266, 1222, 1157, 1096, 1037, 1034, 837, 749, 687, 550, 524.

## 2-([1,1'-Biphenyl]-4-ylmethyl)-4-oxo-4-phenylbutanenitrile (2s)

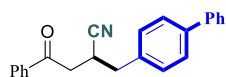

The title compound **2s** was prepared according to the general procedure as described, silica gel flash column chromatography was performed hexanes and ethyl acetate (10:1) (R<sub>f</sub> = 0.30 in hexane: ethyl acetate = 10 :1) resulting in a yellow solid in 82% yield.

**<sup>1</sup>H NMR** (600 MHz, CDCl<sub>3</sub>) δ 7.93 (d, *J* = 8.4 Hz, 2H), 7.61-7.56 (m, 5H), 7.48 (t, *J* = 7.8 Hz, 2H), 7.43 (t, *J* = 7.2 Hz, 2H), 7.35 (t, *J* = 7.8 Hz, 3H), 3.60-3.56 (m, 1H), 3.38 (dd, *J* = 18.0 Hz, 6.4 Hz, 1H), 3.29 (dd, *J* = 18.0 Hz, 6.6 Hz, 1H), 3.09-3.01 (m, 2H).

**<sup>13</sup>C NMR** (151 MHz, CDCl<sub>3</sub>) δ 195.2, 140.6, 140.4, 135.9, 135.3, 133.8, 129.6, 128.8, 128.7, 128.0, 127.5, 127.3, 127.0, 121.4, 39.8, 37.2, 28.2.

**HRMS(ESI)** *m/z*: [M+H]<sup>+</sup> Calcd. for C<sub>23</sub>H<sub>17</sub>NO 326.1539; Found 326.1539.

**IR (KBr, cm<sup>-1</sup>)** 2925, 2241, 1680, 1646, 1595, 1485, 1477, 1261, 1213, 1107, 1074, 799, 691.

## 4-Oxo-4-phenyl-2-(4-(trifluoromethyl)benzyl)butanenitrile (2t)

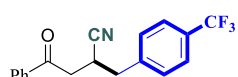

The title compound **2t** was prepared according to the general procedure as described, silica gel flash column chromatography was performed hexanes and ethyl acetate (10:1) (R<sub>f</sub> = 0.30 in hexane: ethyl acetate = 10:1) resulting in a white solid in 75% yield.

**<sup>1</sup>H NMR** (600 MHz, CDCl<sub>3</sub>) δ 7.93 (d, *J* = 7.8 Hz, 2H), 7.63-7.60 (m, 3H), 7.50 (t, *J* = 7.8 Hz, 2H), 7.43 (d, *J* = 7.8 Hz, 2H), 3.59-3.55 (m, 1H), 3.40 (dd, *J* = 18.0 Hz, 6.0 Hz, 1H), 3.29 (dd, *J* = 18.0 Hz, 7.8 Hz, 1H), 3.11 (dd, *J* = 13.8 Hz, 6.6 Hz, 1H), 3.01 (dd, *J* = 13.8 Hz, 8.0 Hz, 1H).

**<sup>13</sup>C NMR** (151 MHz, CDCl<sub>3</sub>) δ 194.9, 140.4, 135.7, 134.0, 129.9 (q, *J* = 32.4 Hz), 128.9, 128.0, 125.8 (q, *J* = 3.6 Hz), 122.043 (q, *J* = 272.2 Hz), 120.9, 39.8, 37.3, 28.0.

**HRMS(ESI)** *m/z*: C<sub>18</sub>H<sub>15</sub>F<sub>3</sub>NO, [M+H]<sup>+</sup>, Calcd: 318.1100; Found: 318.1099.

**IR (KBr, cm<sup>-1</sup>)** 2933, 2246, 1682, 1648, 1327, 1170, 1124, 850, 831, 687, 644, 571.

## 4-(2-Cyano-4-oxo-4-phenylbutyl)benzonitrile (2u)

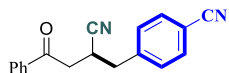

The title compound **2u** was prepared according to the general procedure as described, silica gel flash column chromatography was performed hexanes and ethyl acetate (10:1) ( $R_f$  = 0.30 in hexane: ethyl acetate = 10:1) resulting in a white crystal in 79% yield.

**$^1\text{H}$  NMR** (600 MHz,  $\text{CDCl}_3$ )  $\delta$  7.93 (d,  $J$  = 7.8 Hz, 2H), 7.66-7.62 (m, 3H), 7.51 (t,  $J$  = 7.8 Hz, 2H), 7.44 (d,  $J$  = 7.8 Hz, 2H), 3.59-3.54 (m, 1H), 3.42 (dd,  $J$  = 18.0 Hz, 5.4 Hz, 1H), 3.30 (dd,  $J$  = 18.0 Hz, 7.8 Hz, 1H), 3.12 (dd,  $J$  = 13.8 Hz, 4.9 Hz, 1H), 3.00-2.97 (dd,  $J$  = 13.8 Hz, 8.0 Hz, 1H).

**$^{13}\text{C}$  NMR** (151 MHz,  $\text{CDCl}_3$ )  $\delta$  194.7, 141.9, 135.7, 134.1, 132.6, 130.0, 128.9, 128.0, 120.6, 118.4, 111.7, 39.8, 37.5, 28.0.

**HRMS(ESI)**  $m/z$ :  $\text{C}_{18}\text{H}_{15}\text{N}_2\text{O}$ ,  $[\text{M}+\text{H}]^+$ , Calcd: 275.1179, Found: 275.1178.

**IR** ( $\text{KBr}$ ,  $\text{cm}^{-1}$ ) 2870, 2243, 1679, 1593, 1447, 1357, 1214, 936, 848, 828, 758, 690, 597, 575.

### 2-(4-Ethylbenzyl)-4-oxo-4-phenylbutanenitrile (2v)

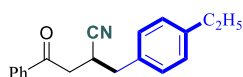

The title compound **2v** was prepared according to the general procedure as described, silica gel flash column chromatography was performed hexanes and ethyl acetate (10:1) ( $R_f$  = 0.30 in hexane: ethyl acetate = 10:1) resulting in a yellow oil in 76% yield.

**$^1\text{H}$  NMR** (600 MHz,  $\text{CDCl}_3$ )  $\delta$  7.92 (d,  $J$  = 7.2 Hz, 2H), 7.83 (t,  $J$  = 7.2 Hz, 1H), 7.59 7.48 (t,  $J$  = 7.8 Hz, 2H), 7.45 (q,  $J$  = 7.8 Hz, 4H), 3.40 (dd,  $J$  = 17.4 Hz, 6.6 Hz, 1H), 3.54-3.50 (m, 1H), 3.35 (dd,  $J$  = 18.0 Hz, 6.6 Hz, 1H), 3.25 (dd,  $J$  = 18.0 Hz, 6.6 Hz, 1H), 3.01-2.94 (m, 2H), 2.63 (q,  $J$  = 7.5 Hz, 2H), 1.23 (t,  $J$  = 7.5 Hz, 3H).

**$^{13}\text{C}$  NMR** (151 MHz,  $\text{CDCl}_3$ )  $\delta$  195.3, 143.4, 135.9, 133.8, 133.5, 129.1, 128.8, 128.3, 128.0, 121.5, 39.7, 37.1, 28.4, 28.2, 15.4.

**HRMS(ESI)**  $m/z$ :  $\text{C}_{19}\text{H}_{20}\text{NO}$ ,  $[\text{M}+\text{H}]^+$ , Calcd: 278.1539, Found: 278.1536.

**IR** ( $\text{KBr}$ ,  $\text{cm}^{-1}$ ) 2924, 2235, 1680, 1452, 1376, 1179, 1109, 833, 696.

### 2-(4-Methoxyphenyl)-4-oxo-4-phenylbutanenitrile (2w)

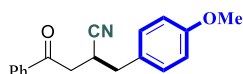

The title compound **2w** was prepared according to the general procedure as described, silica gel flash column chromatography was performed hexanes and ethyl acetate (10:1) ( $R_f$  = 0.30 in hexane: ethyl acetate = 10:1) resulting in a white solid in 79% yield.

**$^1\text{H}$  NMR** (600 MHz,  $\text{CDCl}_3$ )  $\delta$  7.92 (t,  $J$  = 7.2 Hz, 2H), 7.60 (d,  $J$  = 7.2 Hz, 1H), 7.48 (t,  $J$  = 8.4 Hz, 2H), 7.20 (d,  $J$  = 8.4 Hz, 2H), 6.87 (d,  $J$  = 8.5 Hz, 2H), 3.80 (s, 3H), 3.51-3.49 (m, 1H), 3.34 (dd,  $J$  = 18.0 Hz, 6.6 Hz, 1H), 3.25 (dd,  $J$  = 18.0 Hz, 6.6 Hz, 1H), 2.99-2.91 (m, 2H).

**$^{13}\text{C}$  NMR** (151 MHz,  $\text{CDCl}_3$ )  $\delta$  195.3, 159.0, 135.9, 133.8, 130.2, 128.8, 128.3, 128.0, 121.5, 114.2, 55.2, 39.6, 36.7, 28.4.

**HRMS(ESI)**  $m/z$ :  $\text{C}_{18}\text{H}_{18}\text{NO}_2$ ,  $[\text{M}+\text{H}]^+$ , Calcd: 280.1332, Found: 280.1331.

**IR** ( $\text{KBr}$ ,  $\text{cm}^{-1}$ ) 2945, 2212, 1678, 1587, 1359, 1276, 1250, 1185, 1165, 815.

### 2-(2-Methylbenzyl)-4-oxo-4-phenylbutanenitrile (2x)

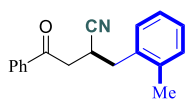

The title compound **2x** was prepared according to the general procedure as described, silica gel flash column chromatography was performed hexanes and ethyl acetate (10:1) ( $R_f$  = 0.30 in hexane: ethyl acetate = 10:1) resulting in a yellow oil in 88% yield.

**$^1\text{H}$  NMR** (600 MHz,  $\text{CDCl}_3$ )  $\delta$  7.94 (d,  $J$  = 7.2 Hz, 2H), 7.61 (t,  $J$  = 7.8 Hz, 1H), 7.49 (t,  $J$  = 7.8 Hz, 2H), 7.22 (d,  $J$  = 41.3 Hz, 4H), 3.54-3.49 (m, 1H), 3.43 (dd,  $J$  = 17.8 Hz, 6.6 Hz, 1H), 3.31 (dd,  $J$  = 18.0 Hz, 6.6 Hz, 1H), 3.05-2.98 (m, 2H), 2.40 (s, 3H).

**$^{13}\text{C}$  NMR** (151 MHz,  $\text{CDCl}_3$ )  $\delta$  195.2, 136.4, 135.9, 134.8, 133.8, 130.8, 130.0, 128.8, 128.0, 127.5, 126.3, 121.4, 40.3, 35.1, 27.3, 19.3.

**HRMS(ESI)**  $m/z$ :  $\text{C}_{18}\text{H}_{17}\text{NO}$ ,  $[\text{M}+\text{H}]^+$ , Calcd: 264.1383, Found: 264.1382.

**IR (KBr,  $\text{cm}^{-1}$ )** 2924, 2235, 1680, 1452, 1376, 1179, 1109, 833, 696.

### 2-(2-Chlorobenzyl)-4-oxo-4-phenylbutanenitrile (2y)

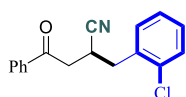

The title compound **2y** was prepared according to the general procedure as described, silica gel flash column chromatography was performed hexanes and ethyl acetate (10:1) ( $R_f$  = 0.30 in hexane: ethyl acetate = 10:1) resulting in a yellow oil in 68% yield.

**$^1\text{H}$  NMR** (600 MHz,  $\text{CDCl}_3$ )  $\delta$  7.94 (d,  $J$  = 7.8 Hz, 2H), 7.61 (t,  $J$  = 7.8 Hz, 1H), 7.49 (t,  $J$  = 7.7 Hz, 2H), 7.40-7.38 (m, 2H), 7.27-7.23 (m, 2H), 3.68-3.63 (m, 1H), 3.44 (dd,  $J$  = 18.0 Hz, 6.0 Hz, 1H), 3.30 (dd,  $J$  = 18.0 Hz, 6.0 Hz, 1H), 3.22-3.13 (m, 2H).

**$^{13}\text{C}$  NMR** (151 MHz,  $\text{CDCl}_3$ )  $\delta$  195.0, 135.8, 134.2, 133.8, 131.6, 129.9, 129.0, 128.8, 128.0, 127.2, 121.0, 40.1, 35.2, 26.9.

**HRMS(ESI)**  $m/z$ :  $\text{C}_{17}\text{H}_{15}\text{ClNO}$ ,  $[\text{M}+\text{H}]^+$ , Calcd: 284.0837, Found: 284.0834.

**IR (KBr,  $\text{cm}^{-1}$ )** 2984, 2244, 1737, 1689, 1475, 1448, 1372, 1244, 1047, 754, 689.

### 2-(3-Methylbenzyl)-4-oxo-4-phenylbutanenitrile (2z)

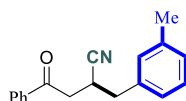

The title compound **2z** was prepared according to the general procedure as described, silica gel flash column chromatography was performed hexanes and ethyl acetate (10:1) ( $R_f$  = 0.30 in hexane: ethyl acetate = 10:1) resulting in a yellow oil in 86% yield.

**$^1\text{H}$  NMR** (600 MHz,  $\text{CDCl}_3$ )  $\delta$  7.92-7.90 (m, 2H), 7.60 (t,  $J$  = 7.2 Hz, 1H), 7.48 (t,  $J$  = 7.8 Hz, 2H), 7.22 (t,  $J$  = 7.8 Hz, 1H), 7.09-7.06 (m, 3H), 3.55-3.51 (m, 1H), 3.35 (dd,  $J$  = 18.0 Hz, 6.6 Hz, 1H), 3.24 (dd,  $J$  = 18.0 Hz, 6.6 Hz, 1H), 3.01-2.92 (m, 2H), 2.33 (s, 3H).

**$^{13}\text{C}$  NMR** (151 MHz,  $\text{CDCl}_3$ )  $\delta$  195.3, 138.5, 136.3, 135.9, 133.8, 129.9, 128.8, 128.7, 128.2, 128.0, 126.2, 121.4, 39.8, 37.5, 28.1, 21.3.

**HRMS(ESI)**  $m/z$ :  $\text{C}_{18}\text{H}_{18}\text{NO}$ ,  $[\text{M}+\text{H}]^+$ , Calcd: 264.1383, Found: 264.1382.

**IR (KBr,  $\text{cm}^{-1}$ )** 2986, 2240, 1740, 1685, 1473, 1444, 1370, 1248, 1049, 756, 670.



## 2-(3-Chlorobenzyl)-4-oxo-4-phenylbutanenitrile (2aa)

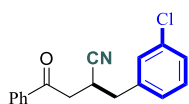

The title compound **2aa** was prepared according to the general procedure as described, silica gel flash column chromatography was performed hexanes and ethyl acetate (10:1) ( $R_f$  = 0.30 in hexane: ethyl acetate = 10:1) resulting in a yellow oil in 84% yield.

**$^1\text{H}$  NMR** (600 MHz,  $\text{CDCl}_3$ )  $\delta$  7.93 (d,  $J$  = 7.8 Hz, 2H), 7.62 (t,  $J$  = 7.8 Hz, 1H), 7.50 (t,  $J$  = 7.8 Hz, 2H), 7.28-7.26 (m, 3H), 7.20-7.19 (m, 1H), 3.56-3.52 (m, 1H), 3.38 (dd,  $J$  = 18.0 Hz, 6.6 Hz, 1H), 3.27 (dd,  $J$  = 18.0 Hz, 7.2 Hz, 1H), 3.02 (dd,  $J$  = 13.8 Hz, 5.4 Hz, 1H), 2.94 (dd,  $J$  = 13.8 Hz, 8.4 Hz, 1H).

**$^{13}\text{C}$  NMR** (151 MHz,  $\text{CDCl}_3$ )  $\delta$  194.0, 137.4, 136.1, 135.2, 133.7, 130.1, 129.1, 128.9, 128.1, 127.5, 126.0, 121.1, 39.8, 37.5, 28.1.

**HRMS(ESI)**  $m/z$ :  $\text{C}_{17}\text{H}_{15}\text{ClNO}$ ,  $[\text{M}+\text{H}]^+$ , Calcd: 284.0837, Found: 284.0835.

**IR** ( $\text{KBr}$ ,  $\text{cm}^{-1}$ ) 2927, 2241, 1685, 1647, 1597, 1448, 1180, 999, 982, 755, 693.

## 2-(Naphthalen-2-ylmethyl)-4-oxo-4-phenylbutanenitrile (2ab)

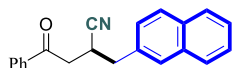

The title compound **2ab** was prepared according to the general procedure as described, silica gel flash column chromatography was performed hexanes and ethyl acetate (10:1) ( $R_f$  = 0.30 in hexane: ethyl acetate = 10:1) resulting in a white solid in 93% yield.

**$^1\text{H}$  NMR** (600 MHz,  $\text{CDCl}_3$ )  $\delta$  7.90 (d,  $J$  = 7.8 Hz, 2H), 7.83 (d,  $J$  = 8.4 Hz, 2H), 7.80-7.77 (m, 1H), 7.72 (s, 1H), 7.58 (t,  $J$  = 7.2 Hz, 1H), 7.48-7.44 (m, 4H), 7.41 (d,  $J$  = 7.8 Hz, 1H), 3.66-3.61 (m, 1H), 3.37 (dd,  $J$  = 17.4 Hz, 6.6 Hz, 1H), 3.23 (dd,  $J$  = 18.0 Hz, 7.2 Hz, 1H), 3.20-3.12 (m, 2H).

**$^{13}\text{C}$  NMR** (151 MHz,  $\text{CDCl}_3$ )  $\delta$  195.3, 135.9, 133.8, 133.8, 133.5, 132.7, 128.8, 128.6, 128.0, 128.0, 127.7, 127.7, 127.0, 126.3, 126.0, 121.4, 39.8, 37.7, 28.1.

**HRMS(ESI)**  $m/z$ :  $\text{C}_{21}\text{H}_{18}\text{NO}$ ,  $[\text{M}+\text{H}]^+$ , Calcd: 300.1383, Found: 300.1382.

**IR** ( $\text{KBr}$ ,  $\text{cm}^{-1}$ ) 2923, 2243, 1685, 1363, 1215, 747, 688, 477.

## 4-Oxo-4-phenyl-2-(thiophen-2-ylmethyl)butanenitrile (2ac)

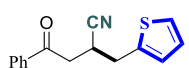

The title compound **2ac** was prepared according to the general procedure as described, silica gel flash column chromatography was performed hexanes and ethyl acetate (10:1) ( $R_f$  = 0.30 in hexane: ethyl acetate = 10:1) resulting in a yellow oil white solid in 80% yield.

**$^1\text{H}$  NMR** (600 MHz,  $\text{CDCl}_3$ )  $\delta$  7.20 (d,  $J$  = 7.2 Hz, 2H), 7.20 (t,  $J$  = 7.4 Hz, 1H), 7.49 (t,  $J$  = 7.8 Hz, 2H), 7.22 (dd,  $J$  = 4.8 Hz, 1.8 Hz, 1H), 6.98-6.97 (m, 2H), 3.57 (m, 1H), 3.37 (dd,  $J$  = 18.0 Hz, 6.6 Hz, 1H), 3.32-3.28 (m, 1H), 3.27 (d,  $J$  = 6.6 Hz, 2H).

**$^{13}\text{C}$  NMR** (151 MHz,  $\text{CDCl}_3$ )  $\delta$  195.0, 137.8, 135.8, 133.8, 128.8, 128.0, 127.3, 127.0, 125.0, 121.1, 39.4, 31.5, 28.4.

**HRMS(ESI)**  $m/z$ :  $\text{C}_{15}\text{H}_{14}\text{NOS}$ ,  $[\text{M}+\text{H}]^+$ , Calcd: 256.0791, Found: 256.0788.



**IR (KBr, cm<sup>-1</sup>)** 2857, 2153, 1684, 1477, 1362, 1216, 1182, 756, 694.

### 2-Methyl-4-oxo-4-phenylbutanenitrile (**3a**)<sup>[7]</sup>

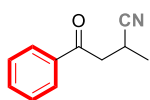

The title compound **3a** was prepared according to the general procedure as described, silica gel flash column chromatography was performed hexanes and ethyl acetate (15:1) (*R<sub>f</sub>* = 0.30 in hexane: ethyl acetate = 15:1) resulting in a yellow oil in 96% yield.

**<sup>1</sup>H NMR** (600 MHz, CDCl<sub>3</sub>) δ 7.96-7.84 (d, *J* = 7.2 Hz 2H), 7.61 (t, *J* = 7.8 Hz, 1H), 7.50 (t, *J* = 7.8 Hz, 2H), 3.42 (dd, *J* = 17.4 Hz, 6.0 Hz, 1H), 3.38-3.32 (m, 1H), 3.22 (dd, *J* = 17.4 Hz, 7.2 Hz, 1H), 1.43 (d, *J* = 7.2 Hz, 3H).

**<sup>13</sup>C NMR** (151 MHz, CDCl<sub>3</sub>) δ 195.1, 135.9, 133.8, 128.8, 128.0, 122.5, 42.2, 20.5, 17.9.

**HRMS(ESI)** *m/z*: C<sub>11</sub>H<sub>12</sub>NO, [M+H]<sup>+</sup>, Calcd: 174.0913, Found: 174.0914.

**IR (KBr, cm<sup>-1</sup>)** 2937, 2241, 1685, 1646, 1407, 1362, 1217, 754, 691.

### 4-(4-Chlorophenyl)-2-methyl-4-oxobutanenitrile (**3b**)<sup>[7]</sup>

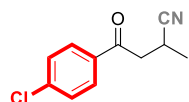

The title compound **3b** was prepared according to the general procedure as described, silica gel flash column chromatography was performed hexanes and ethyl acetate (15:1) (*R<sub>f</sub>* = 0.30 in hexane: ethyl acetate = 15:1) resulting in a colorless oil in 96% yield.

**<sup>1</sup>H NMR** (600 MHz, CDCl<sub>3</sub>) δ 7.89 (d, *J* = 8.4 Hz, 2H), 7.47 (d, *J* = 8.4 Hz, 2H), 3.39 (dd, *J* = 17.4 Hz, 6.6 Hz, 1H), 3.33 (dd, *J* = 13.8 Hz, 7.2 Hz, 1H), 3.18 (dd, *J* = 17.4 Hz, 6.6 Hz, 1H), 1.43 (d, *J* = 6.6 Hz, 3H).

**<sup>13</sup>C NMR** (151 MHz, CDCl<sub>3</sub>) δ 193.9, 140.4, 134.2, 129.4, 129.1, 122.3, 42.2, 20.5, 17.8.

**HRMS(ESI)** *m/z*: C<sub>11</sub>H<sub>11</sub>ClNO, [M+H]<sup>+</sup>, Calcd: 208.0524, Found: 208.0523.

**IR (KBr, cm<sup>-1</sup>)** 3039, 2981, 2243, 1685, 1402, 1217, 1087, 822, 593, 523, 459.

### 2-Methyl-4-oxo-4-(p-tolyl)butanenitrile (**3c**)<sup>[7]</sup>

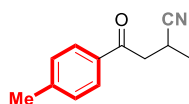

The title compound **3c** was prepared according to the general procedure as described, silica gel flash column chromatography was performed hexanes and ethyl acetate (15:1) (*R<sub>f</sub>* = 0.30 in hexane: ethyl acetate = 15:1) resulting in a colorless oil in 92% yield.

**<sup>1</sup>H NMR** (600 MHz, CDCl<sub>3</sub>) δ 7.85 (d, *J* = 7.8 Hz, 2H), 7.29 (d, *J* = 7.8 Hz, 2H), 3.40-3.31 (m, 2H), 3.19 (dd, *J* = 16.8 Hz, 6.6 Hz, 1H), 2.43 (s, 3H), 1.42 (d, *J* = 6.6 Hz, 3H).

**<sup>13</sup>C NMR** (151 MHz, CDCl<sub>3</sub>) δ 194.7, 144.7, 133.5, 129.5, 128.1, 122.6, 42.1, 21.6, 20.5, 17.9.

**HRMS(ESI)** *m/z*: C<sub>12</sub>H<sub>14</sub>NO, [M+H]<sup>+</sup>, Calcd: 188.1070, Found: 188.1068.

**IR (KBr, cm<sup>-1</sup>)** 2921, 2241, 1684, 1603, 1455, 1357, 1277, 1203, 999, 816.

### 4-(4-Methoxyphenyl)-2-methyl-4-oxobutanenitrile (**3d**)<sup>[7]</sup>

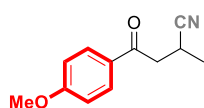

The title compound **3d** was prepared according to the general procedure as described, silica gel flash column chromatography was performed hexanes and ethyl acetate (15:1) ( $R_f = 0.30$  in hexane: ethyl acetate = 15:1) resulting in a white crystal colorless oil in 83% yield.

**$^1\text{H}$  NMR** (600 MHz,  $\text{CDCl}_3$ )  $\delta$  7.93 (d,  $J = 8.4$  Hz, 2H), 6.96 (d,  $J = 8.4$  Hz, 2H), 3.88 (s, 3H), 3.37-3.32 (m, 2H), 3.18-3.14 (m, 1H), 1.42 (d,  $J = 6.6$  Hz, 3H).

**$^{13}\text{C}$  NMR** (151 MHz,  $\text{CDCl}_3$ )  $\delta$  193.6, 164.0, 130.3, 129.1, 122.7, 114.0, 55.5, 41.8, 20.6, 17.9.

**HRMS(ESI)**  $m/z$ :  $\text{C}_{12}\text{H}_{14}\text{NO}_2$ ,  $[\text{M}+\text{H}]^+$ , Calcd: 204.1019, Found: 204.1016.

**IR** ( $\text{KBr}$ ,  $\text{cm}^{-1}$ ) 2939, 2049, 1677, 1601, 1512, 1263, 1174, 1028, 835, 610, 586.

#### 4-(2-Chlorophenyl)-2-methyl-4-oxobutanenitrile (**3e**)<sup>[8]</sup>

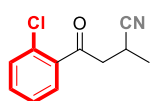

The title compound **3e** was prepared according to the general procedure as described, silica gel flash column chromatography was performed hexanes and ethyl acetate (15:1) ( $R_f = 0.30$  in hexane: ethyl acetate = 15:1) resulting in a colorless oil in 93% yield.

**$^1\text{H}$  NMR** (600 MHz,  $\text{CDCl}_3$ )  $\delta$  7.54 (d,  $J = 7.8$  Hz, 1H), 7.44 (t,  $J = 4.8$  Hz, 2H), 7.37-7.35 (m, 1H), 3.40 (dd,  $J = 17.4$  Hz, 6.0 Hz, 1H), 3.35-3.30 (m, 2H), 3.25 (dd,  $J = 18.0$  Hz, 7.2 Hz, 1H), 1.43 (d,  $J = 6.6$  Hz, 3H).

**$^{13}\text{C}$  NMR** (151 MHz,  $\text{CDCl}_3$ )  $\delta$  198.1, 137.9, 132.5, 131.2, 130.8, 129.3, 127.2, 122.1, 46.4, 20.8, 17.7.

**HRMS(ESI)**  $m/z$ :  $\text{C}_{11}\text{H}_{11}\text{ClNO}$ ,  $[\text{M}+\text{H}]^+$ , Calcd: 208.0524, Found: 208.0519.

**IR** ( $\text{KBr}$ ,  $\text{cm}^{-1}$ ) 2937, 2233, 1688, 1603, 1455, 1357, 1277, 1203, 980, 746.

#### 2-Methyl-4-oxo-4-(*o*-tolyl)butanenitrile (**3f**)

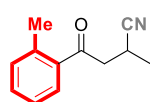

The title compound **3f** was prepared according to the general procedure as described, silica gel flash column chromatography was performed hexanes and ethyl acetate (15:1) ( $R_f = 0.30$  in hexane: ethyl acetate = 15:1) resulting in a colorless oil in 95% yield.

**$^1\text{H}$  NMR** (600 MHz,  $\text{CDCl}_3$ )  $\delta$  7.75 (t,  $J = 8.4$  Hz, 2H), 7.43-7.36 (m, 2H), 3.41-3.31 (m, 2H), 3.21 (dd,  $J = 17.2$  Hz, 6.6 Hz, 1H), 2.42 (s, 3H), 1.42 (d,  $J = 6.6$  Hz, 3H).

**$^{13}\text{C}$  NMR** (151 MHz,  $\text{CDCl}_3$ )  $\delta$  195.3, 138.7, 136.0, 134.5, 128.7, 128.5, 125.2, 122.6, 42.3, 21.3, 20.5, 17.9.

**HRMS(ESI)**  $m/z$ :  $\text{C}_{12}\text{H}_{13}\text{NNaO}$ ,  $[\text{M}+\text{H}]^+$ , Calcd: 210.0889, Found: 210.0887.

**IR** ( $\text{KBr}$ ,  $\text{cm}^{-1}$ ) 2939, 2249, 1683, 1512, 1363, 1174, 1028, 835, 740.

#### 4-(3-Chlorophenyl)-2-methyl-4-oxobutanenitrile (**3g**)<sup>[8]</sup>

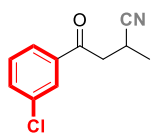

The title compound **3g** was prepared according to the general procedure as described, silica gel flash column chromatography was performed hexanes and ethyl acetate (15:1) ( $R_f$  = 0.30 in hexane: ethyl acetate = 15:1) resulting in a colorless oil in 87% yield.

**$^1\text{H}$  NMR** (600 MHz,  $\text{CDCl}_3$ )  $\delta$  7.85 (d,  $J$  = 7.8 Hz, 2H), 7.29 (d,  $J$  = 7.8 Hz, 2H), 3.40 (dd,  $J$  = 17.2 Hz, 6.0 Hz, 1H), 3.36-3.03 (m, 1H), 3.19 (dd,  $J$  = 17.2 Hz, 6.6 Hz, 1H), 1.44 (d,  $J$  = 6.6 Hz, 3H).

**$^{13}\text{C}$  NMR** (151 MHz,  $\text{CDCl}_3$ )  $\delta$  193.9, 137.4, 135.2, 133.7, 130.1, 128.1, 126.0, 122.3, 42.4, 20.5, 17.8.

**HRMS(ESI)**  $m/z$ :  $\text{C}_{11}\text{H}_{11}\text{ClNO}$ ,  $[\text{M}+\text{H}]^+$ , Calcd: 208.0524, Found: 208.0523.

**IR** (KBr,  $\text{cm}^{-1}$ ) 2923, 2242, 1685, 1603, 1587, 1484, 1359, 1276, 1250, 1185, 1165, 785, 690.

### 2-Methyl-4-oxo-4-(m-tolyl)butanenitrile (3h)

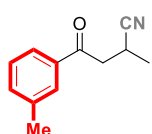

The title compound **3h** was prepared according to the general procedure as described, silica gel flash column chromatography was performed hexanes and ethyl acetate (15:1) ( $R_f$  = 0.30 in hexane: ethyl acetate = 15:1) resulting in a colorless oil in 92% yield.

**$^1\text{H}$  NMR** (600 MHz,  $\text{CDCl}_3$ )  $\delta$  7.65 (d,  $J$  = 7.8 Hz, 1H), 7.42 (t,  $J$  = 7.8 Hz, 1H), 7.30-7.26 (m, 2H), 3.36-3.31 (m, 2H), 3.14 (dd,  $J$  = 16.2 Hz, 6.6 Hz, 1H), 2.53 (s, 3H), 1.42 (d,  $J$  = 6.6 Hz, 3H).

**$^{13}\text{C}$  NMR** (151 MHz,  $\text{CDCl}_3$ )  $\delta$  198.6, 138.9, 136.3, 132.3, 132.1, 128.5, 125.8, 122.5, 44.7, 21.4, 20.7, 17.8.

**HRMS(ESI)**  $m/z$ :  $\text{C}_{12}\text{H}_{13}\text{NNaO}$ ,  $[\text{M}+\text{H}]^+$ , Calcd: 210.0889, Found: 210.0887.

**IR** (KBr,  $\text{cm}^{-1}$ ) 2940, 2051, 1679, 1600, 1514, 1260, 1175, 1028, 610.

### 4-Cyclohexyl-2-methyl-4-oxobutanenitrile (3i)

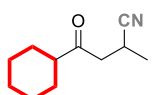

The title compound **3i** was prepared according to the general procedure as described, silica gel flash column chromatography was performed hexanes and ethyl acetate (15:1) ( $R_f$  = 0.30 in hexane: ethyl acetate = 15:1) resulting in a colorless oil in 89% yield.

**$^1\text{H}$  NMR** (600 MHz,  $\text{CDCl}_3$ )  $\delta$  3.16-3.12 (m, 1H), 2.87 (dd,  $J$  = 17.9 Hz, 6.4 Hz, 1H), 2.66 (dd,  $J$  = 17.9 Hz, 7.2 Hz, 1H), 2.35-2.31 (m, 1H), 1.85-1.78 (m, 4H), 1.71-1.65 (m, 2H), 1.37-1.27 (m, 7H).

**$^{13}\text{C}$  NMR** (151 MHz,  $\text{CDCl}_3$ )  $\delta$  209.0, 122.5, 50.7, 43.9, 28.2, 28.1, 25.7, 25.4, 25.4, 20.1, 17.7.

**HRMS(ESI)**  $m/z$ :  $\text{C}_{11}\text{H}_{17}\text{NNaO}$ ,  $[\text{M}+\text{H}]^+$ , Calcd: 202.1202, Found: 202.1200.

**IR** (KBr,  $\text{cm}^{-1}$ ) 2931, 2856, 2241, 1709, 1451, 1290, 1286, 1148, 1002, 699.

### 2-Methyl-4-oxo-5-phenylpentanenitrile (3j)<sup>[6]</sup>

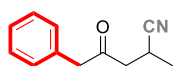

The title compound **3j** was prepared according to the general procedure as described, silica gel flash column chromatography was performed hexanes and ethyl acetate (20:1) ( $R_f$  = 0.20 in hexane: ethyl acetate = 20:1) resulting in a colorless oil in 76% yield.

**<sup>1</sup>H NMR** (600 MHz, CDCl<sub>3</sub>) δ 7.20 (t, *J* = 7.2 Hz, 2H), 7.30 (t, *J* = 7.2 Hz, 1H), 7.20 (d, *J* = 7.2 Hz, 2H), 3.71 (s, 2H), 3.11-3.06 (m, 1H), 2.85 (dd, *J* = 18.0 Hz, 6.0 Hz, 1H), 2.65 (dd, *J* = 18.0 Hz, 7.2 Hz, 1H), 1.25 (d, *J* = 7.2 Hz, 3H).

**<sup>13</sup>C NMR** (151 MHz, CDCl<sub>3</sub>) δ 203.5, 133.1, 129.3, 129.0, 127.4, 122.2, 50.1, 44.9, 20.2, 17.5.

**HRMS(ESI)** *m/z*: C<sub>12</sub>H<sub>14</sub>NO, [M+H]<sup>+</sup>, Calcd: 188.1070, Found: 188.1066.

**IR (KBr, cm<sup>-1</sup>)** 2939, 2241, 1719, 1496, 1455, 1322, 1090, 1039, 749, 702.

#### 4-Oxo-2,4-diphenylbutanenitrile (**5a**)<sup>[5]</sup>

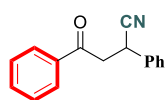

The title compound **5a** was prepared according to the general procedure as described, silica gel flash column chromatography was performed hexanes and ethyl acetate (10:1) (*R<sub>f</sub>* = 0.40 in hexane: ethyl acetate = 10:1) resulting in a white solid in 75% yield.

**<sup>1</sup>H NMR** (600 MHz, CDCl<sub>3</sub>) δ 7.93 (d, *J* = 7.8 Hz, 2H), 7.59 (t, *J* = 7.2 Hz, 1H), 7.48-7.43 (m, 4H), 7.39 (t, *J* = 7.8 Hz, 2H), 7.34 (t, *J* = 7.2 Hz, 1H), 4.57 (t, *J* = 6.6 Hz, 1H), 3.73 (dd, *J* = 17.4 Hz, 7.8 Hz, 1H), 3.51 (dd, *J* = 18.0 Hz, 6.0 Hz, 1H).

**<sup>13</sup>C NMR** (151 MHz, CDCl<sub>3</sub>) δ 194.6, 135.7, 135.3, 133.8, 129.2, 128.8, 128.3, 128.1, 127.4, 120.5, 44.5, 31.9.

**HRMS(ESI)** *m/z*: C<sub>16</sub>H<sub>14</sub>NO, [M+H]<sup>+</sup>, Calcd: 236.1070, Found: 236.1067.

**IR (KBr, cm<sup>-1</sup>)** 2916, 2238, 1681, 1594, 1408, 1357, 1307, 1208, 1033, 760, 693, 617.

#### 4-(4-Chlorophenyl)-4-oxo-2-phenylbutanenitrile (**5b**)<sup>[5]</sup>

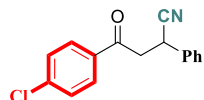

The title compound **5b** was prepared according to the general procedure as described, silica gel flash column chromatography was performed hexanes and ethyl acetate (10:1) (*R<sub>f</sub>* = 0.40 in hexane: ethyl acetate = 10:1) resulting in a white solid in 78% yield.

**<sup>1</sup>H NMR** (600 MHz, CDCl<sub>3</sub>) δ 7.86 (d, *J* = 9.0 Hz, 2H), 7.45-7.38 (m, 6H), 7.34 (t, *J* = 7.2 Hz, 1H), 4.55 (dd, *J* = 8.4 Hz, 6.6 Hz, 1H), 3.69 (dd, *J* = 18.0 Hz, 7.8 Hz, 1H), 3.46 (dd, *J* = 17.2 Hz, 6.0 Hz, 1H).

**<sup>13</sup>C NMR** (151 MHz, CDCl<sub>3</sub>) δ 193.4, 140.5, 135.1, 134.0, 129.4, 129.3, 129.1, 128.4, 127.4, 120.3, 44.4, 31.9.

**HRMS(ESI)** *m/z*: C<sub>17</sub>H<sub>16</sub>NO, [M+H]<sup>+</sup>, Calcd: 252.1383, Found: 252.1383.

**IR (KBr, cm<sup>-1</sup>)** 2927, 2241, 1678, 1587, 1400, 1219, 1184, 1001, 993, 829, 754, 601, 532, 455.

#### 4-(4-Bromophenyl)-4-oxo-2-phenylbutanenitrile (**5c**)<sup>[5]</sup>

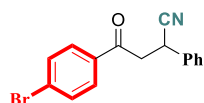

The title compound **5c** was prepared according to the general procedure as described, silica gel flash column chromatography was performed hexanes and ethyl acetate (10:1) (*R<sub>f</sub>* = 0.40 in hexane: ethyl acetate = 10:1) resulting in a white solid in 73% yield.

**<sup>1</sup>H NMR** (600 MHz, CDCl<sub>3</sub>) δ 7.78 (d, *J* = 9.0 Hz, 2H), 7.61 (d, *J* = 8.4 Hz, 2H), 7.43-7.38 (m, 4H), 7.34

(t,  $J = 7.2$  Hz, 1H), 4.55-4.53 (m, 1H), 3.68 (dd,  $J = 17.2$  Hz, 7.8 Hz, 1H), 3.46 (dd,  $J = 17.2$  Hz, 6.0 Hz, 1H).

$^{13}\text{C}$  NMR (151 MHz,  $\text{CDCl}_3$ )  $\delta$  193.6, 135.1, 134.5, 132.2, 129.5, 129.3, 128.4, 127.4, 120.3, 44.4, 31.9.

HRMS(ESI)  $m/z$ :  $\text{C}_{16}\text{H}_{13}\text{BrNO}$ ,  $[\text{M}+\text{H}]^+$ , Calcd: 314.0175, Found: 314.0173.

IR (KBr,  $\text{cm}^{-1}$ ) 2926, 2247, 1685, 1593, 1446, 1348, 1211, 981, 840, 761, 690, 611.

#### 4-Oxo-2-phenyl-4-(p-tolyl)butanenitrile (**5d**)<sup>[5]</sup>

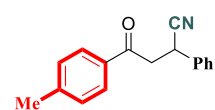

The title compound **5d** was prepared according to the general procedure as described, silica gel flash column chromatography was performed hexanes and ethyl acetate (10:1) ( $R_f = 0.40$  in hexane: ethyl acetate = 10:1) resulting in a yellow oil in 82% yield.

$^1\text{H}$  NMR (600 MHz,  $\text{CDCl}_3$ )  $\delta$  7.82 (d,  $J = 8.4$  Hz, 2H), 7.43 (d,  $J = 7.2$  Hz, 2H), 7.38 (t,  $J = 7.5$  Hz, 2H), 7.33 (t,  $J = 7.5$  Hz, 1H), 7.25 (d,  $J = 3$  Hz, 2H), 4.56 (dd,  $J = 7.8$  Hz, 6.6 Hz, 1H), 3.69 (dd,  $J = 18.0$  Hz, 7.8 Hz, 1H), 3.47 (dd,  $J = 17.2$  Hz, 6.0 Hz, 1H), 2.41 (s, 3H).

$^{13}\text{C}$  NMR (151 MHz,  $\text{CDCl}_3$ )  $\delta$  194.2, 144.8, 135.4, 133.3, 129.5, 129.2, 128.3, 128.2, 127.5, 120.6, 44.4, 31.9, 21.6.

HRMS(ESI)  $m/z$ :  $\text{C}_{17}\text{H}_{16}\text{NO}$ ,  $[\text{M}+\text{H}]^+$ , Calcd: 250.1226, Found: 250.1227.

IR (KBr,  $\text{cm}^{-1}$ ) 2924, 2243, 1678, 1454, 1259, 1205, 1182, 810, 700.

#### 4-(2-Chlorophenyl)-4-oxo-2-phenylbutanenitrile (**5e**)<sup>[5]</sup>

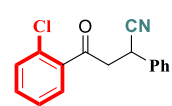

The title compound **5e** was prepared according to the general procedure as described, silica gel flash column chromatography was performed hexanes and ethyl acetate (10:1) ( $R_f = 0.40$  in hexane: ethyl acetate = 10:1) resulting in a white solid in 75% yield.

$^1\text{H}$  NMR (600 MHz,  $\text{CDCl}_3$ )  $\delta$  7.48 (d,  $J = 7.8$  Hz, 1H), 7.41-7.37 (m, 6H), 7.35-7.32 (m, 2H), 4.54 (t,  $J = 7.2$  Hz, 1H), 3.71 (dd,  $J = 18.0$  Hz, 7.8 Hz, 1H), 3.54 (dd,  $J = 18.0$  Hz, 6.0 Hz, 1H).

$^{13}\text{C}$  NMR (151 MHz,  $\text{CDCl}_3$ )  $\delta$  197.5, 137.6, 134.8, 132.6, 131.3, 130.7, 129.5, 129.2, 128.4, 127.5, 127.1, 120.2, 48.3, 32.2.

HRMS(ESI)  $m/z$ :  $\text{C}_{16}\text{H}_{13}\text{ClNO}$ ,  $[\text{M}+\text{H}]^+$ , Calcd: 270.0680, Found: 270.0680.

IR (KBr,  $\text{cm}^{-1}$ ) 3078, 2927, 2245, 1701, 1587, 1443, 1361, 1435, 1361, 1203, 1072, 756, 696.

#### 4-Oxo-2-phenyl-4-(o-tolyl)butanenitrile (**5f**)<sup>[5]</sup>

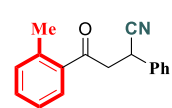

The title compound **5f** was prepared according to the general procedure as described, silica gel flash column chromatography was performed hexanes and ethyl acetate (10:1) ( $R_f = 0.40$  in hexane: ethyl acetate = 10:1) resulting in a yellow oil in 70% yield.

$^1\text{H}$  NMR (600 MHz,  $\text{CDCl}_3$ )  $\delta$  7.58 (d,  $J = 7.8$  Hz, 1H), 7.42-7.37 m, 5H), 7.34 (t,  $J = 7.1$  Hz, 1H), 7.27-7.24 (m, 2H), 4.56-4.53 (m, 1H), 3.65 (dd,  $J = 17.4$  Hz, 7.8 Hz, 1H), 3.45 (dd,  $J = 17.4$  Hz, 6.6 Hz, 1H),

2.50 (s, 3H).

<sup>13</sup>C NMR (151 MHz, CDCl<sub>3</sub>) δ 197.9, 139.1, 136.1, 135.2, 132.3, 132.1, 129.2, 128.5, 128.3, 127.5, 125.8, 120.6, 46.8, 32.2, 21.4.

HRMS(ESI) m/z: C<sub>17</sub>H<sub>16</sub>ClNO, [M+H]<sup>+</sup>, Calcd: 250.1226, Found: 250.1226.

IR (KBr, cm<sup>-1</sup>) 2929, 2241, 1678, 1598, 1454, 1217, 979, 758, 700, 601.

#### 4-(3-Chlorophenyl)-4-oxo-2-phenylbutanenitrile (**5g**)<sup>[5]</sup>

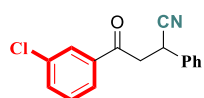

The title compound **5g** was prepared according to the general procedure as described, silica gel flash column chromatography was performed hexanes and ethyl acetate (10:1) (R<sub>f</sub> = 0.40 in hexane: ethyl acetate = 10:1) resulting in a white solid in 72% yield.

<sup>1</sup>H NMR (600 MHz, CDCl<sub>3</sub>) δ 7.89 (s, 1H), 7.76 (d, *J* = 7.8 Hz, 1H), 7.56 (d, *J* = 7.8 Hz, 1H), 7.42-7.34 (m, 5H), 7.34 (t, *J* = 6.0 Hz, 1H), 4.54 (t, *J* = 6.0 Hz, 1H), 3.70 (dd, *J* = 18.0 Hz, 7.8 Hz, 1H), 3.48 (dd, *J* = 18.0 Hz, 5.4 Hz, 1H).

<sup>13</sup>C NMR (151 MHz, CDCl<sub>3</sub>) δ 193.4, 137.2, 135.2, 135.0, 133.8, 130.1, 129.3, 128.5, 128.2, 127.4, 126.1, 120.3, 44.6, 31.8.

HRMS(ESI) m/z: C<sub>16</sub>H<sub>13</sub>ClNO, [M+H]<sup>+</sup>, Calcd: 270.0680, Found: 270.0677.

IR (KBr, cm<sup>-1</sup>) 3089, 2489, 2240, 1688, 1569, 1542, 1217, 1140, 1027, 917, 787, 716, 696, 623, 454.

#### 4-Oxo-2-phenyl-4-(*m*-tolyl)butanenitrile (**5h**)<sup>[5]</sup>

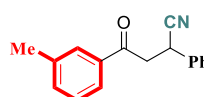

The title compound **5h** was prepared according to the general procedure as described, silica gel flash column chromatography was performed hexanes and ethyl acetate (10:1) (R<sub>f</sub> = 0.40 in hexane: ethyl acetate = 10:1) resulting in a yellow oil in 72% yield.

<sup>1</sup>H NMR (600 MHz, CDCl<sub>3</sub>) δ 7.35-7.70 (m, 2H), 7.43 (d, *J* = 7.2 Hz, 2H), 7.40-7.37 (m, 3H), 7.35-7.32 (m, 2H), 4.57 (dd, *J* = 7.6 Hz, 6.3 Hz, 1H), 3.71 (dd, *J* = 17.9 Hz, 7.9 Hz, 1H), 3.49 (dd, *J* = 17.8 Hz, 6.0 Hz, 1H), 2.40 (s, 3H).

<sup>13</sup>C NMR (151 MHz, CDCl<sub>3</sub>) δ 194.7, 138.7, 135.8, 135.4, 134.6, 129.2, 128.6, 128.6, 128.3, 127.4, 125.3, 120.6, 44.5, 31.9, 21.2.

HRMS(ESI) m/z: C<sub>17</sub>H<sub>16</sub>NO, [M+H]<sup>+</sup>, Calcd: 250.1226, Found: 250.1224.

IR (KBr, cm<sup>-1</sup>) 2918, 2241, 1683, 1454, 1261, 1186, 999, 790, 690.

#### 4-Cyclopropyl-4-oxo-2-phenylbutanenitrile (**5i**)<sup>[5]</sup>

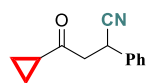

The title compound **5i** was prepared according to the general procedure as described, silica gel flash column chromatography was performed hexanes and ethyl acetate (10:1) (R<sub>f</sub> = 0.40 in hexane: ethyl acetate = 10:1) resulting in a colorless oil in 58% yield.

<sup>1</sup>H NMR (600 MHz, CDCl<sub>3</sub>) δ 7.39-7.32 (m, 5H), 4.38-4.35 (m, 1H), 3.31 (dd, *J* = 17.2 Hz, 7.8 Hz, 1H),

3.09 (dd,  $J = 18.0$  Hz, 6.6 Hz, 1H), 1.90-1.86 (m, 1H), 1.12-1.10(m, 1H), 1.06-1.05 (m, 1H), 0.98-0.89 (m, 2H).

$^{13}\text{C}$  NMR (151 MHz,  $\text{CDCl}_3$ )  $\delta$  205.2, 135.2, 129.2, 128.3, 127.3, 120.4, 48.4, 31.7, 20.7, 11.3, 11.3.

HRMS(ESI)  $m/z$ :  $\text{C}_{13}\text{H}_{14}\text{NO}$ ,  $[\text{M}+\text{H}]^+$ , Calcd: 250.1270, Found: 200.1067.

IR (KBr,  $\text{cm}^{-1}$ ) 2918, 2245, 1701, 1452, 1396, 1170, 1195, 1018, 698.

#### 2-(4-Chlorophenyl)-4-oxo-4-phenylbutanenitrile (**5j**)<sup>[5]</sup>

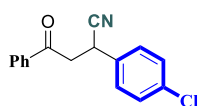

The title compound **5j** was prepared according to the general procedure as described, silica gel flash column chromatography was performed hexanes and ethyl acetate (10:1) ( $R_f = 0.40$  in hexane: ethyl acetate = 10:1) resulting in a yellow oil in 65% yield.

$^1\text{H}$  NMR (600 MHz,  $\text{CDCl}_3$ )  $\delta$  7.92 (d,  $J = 7.8$  Hz, 2H), 7.61 (t,  $J = 6.9$  Hz, 1H), 7.48 (t,  $J = 7.2$  Hz, 2H), 7.49-7.36 (m, 4H), 4.57 (t,  $J = 6.9$  Hz, 1H), 3.71 (dd,  $J = 17.2$  Hz, 6.6 Hz, 1H), 3.51 (dd,  $J = 18.0$  Hz, 6.0 Hz, 1H).

$^{13}\text{C}$  NMR (151 MHz,  $\text{CDCl}_3$ )  $\delta$  194.3, 135.6, 134.4, 134.0, 133.8, 129.4, 128.8, 128.0, 128.0, 120.2, 44.2, 31.3.

HRMS(ESI)  $m/z$ :  $\text{C}_{16}\text{H}_{13}\text{ClNO}$ ,  $[\text{M}+\text{H}]^+$ , Calcd: 270.0680, Found: 270.0676.

IR (KBr,  $\text{cm}^{-1}$ ) 2933, 2243, 1679, 1489, 1406, 1220, 1095, 817, 750, 688, 597.

#### 4-Oxo-4-phenyl-2-(*p*-tolyl)butanenitrile (**5k**)<sup>[5]</sup>

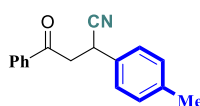

The title compound **5k** was prepared according to the general procedure as described, silica gel flash column chromatography was performed hexanes and ethyl acetate (10:1) ( $R_f = 0.40$  in hexane: ethyl acetate = 10:1) resulting in a white solid in 80% yield.

$^1\text{H}$  NMR (600 MHz,  $\text{CDCl}_3$ )  $\delta$  7.92 (d,  $J = 7.2$  Hz, 2H), 7.59 (t,  $J = 7.7$  Hz, 1H), 7.47 (t,  $J = 7.8$  Hz, 2H), 7.32 (d,  $J = 7.8$  Hz, 2H), 7.19 (d,  $J = 7.8$  Hz, 2H), 4.54-4.52 (m, 1H), 3.70 (dd,  $J = 17.2$  Hz, 7.8 Hz, 1H), 3.49 (dd,  $J = 18.0$  Hz, 6.0 Hz, 1H), 2.35 (s, 3H).

$^{13}\text{C}$  NMR (151 MHz,  $\text{CDCl}_3$ )  $\delta$  194.7, 138.2, 133.8, 132.2, 129.9, 128.8, 128.0, 127.3, 120.7, 44.5, 31.5, 21.0.

HRMS(ESI)  $m/z$ :  $\text{C}_{17}\text{H}_{16}\text{NO}$ ,  $[\text{M}+\text{H}]^+$ , Calcd: 250.1226, Found: 250.1224.

IR (KBr,  $\text{cm}^{-1}$ ) 2916, 2239, 1674, 1593, 1448, 1350, 1205, 1110, 999, 821, 761, 690, 597.

#### 2-(Furan-2-yl)-4-oxo-4-phenylbutanenitrile (**5l**)<sup>[5]</sup>

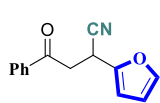

The title compound **5l** was prepared according to the general procedure as described, silica gel flash column chromatography was performed hexanes and ethyl acetate (10:1) ( $R_f = 0.40$  in hexane: ethyl acetate = 10:1) resulting in a white solid in 67% yield.

$^1\text{H}$  NMR (600 MHz,  $\text{CDCl}_3$ )  $\delta$  7.97 (d,  $J = 8.4$  Hz, 2H), 7.62 (t,  $J = 7.2$  Hz, 1H), 7.50 (t,  $J = 7.2$  Hz, 2H),



7.39 (s, 1H), 6.38 (d,  $J = 16.8$  Hz, 2H), 4.69 (t,  $J = 6.6$  Hz, 1H), 3.69 (d,  $J = 6.0$  Hz, 2H).

$^{13}\text{C}$  NMR (151 MHz,  $\text{CDCl}_3$ )  $\delta$  194.2, 146.9, 143.1, 135.6, 133.9, 128.8, 128.1, 118.3, 110.8, 108.2, 40.7, 26.0.

HRMS(ESI)  $m/z$ :  $\text{C}_{14}\text{H}_{12}\text{NO}_2$ ,  $[\text{M}+\text{H}]^+$ , Calcd: 242.0633, Found: 242.0640.

IR (KBr,  $\text{cm}^{-1}$ ) 2916, 2239, 1674, 1593, 1448, 1350, 1205, 1110, 999, 821, 761, 690, 597.

#### 4-Oxo-4-phenyl-2-(thiophen-2-yl)butanenitrile (**5m**)<sup>[5]</sup>

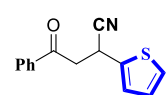

The title compound **5m** was prepared according to the general procedure as described, silica gel flash column chromatography was performed hexanes and ethyl acetate (10:1) ( $R_f = 0.40$  in hexane: ethyl acetate = 10:1) resulting in a white solid in 69% yield.

$^1\text{H}$  NMR (600 MHz,  $\text{CDCl}_3$ )  $\delta$  7.96 (d,  $J = 7.8$  Hz, 2H), 7.62 (t,  $J = 7.2$  Hz, 1H), 7.49 (t,  $J = 7.5$  Hz, 2H), 7.27 (t,  $J = 6.0$  Hz, 1H), 7.17 (d,  $J = 3.0$  Hz, 1H), 6.89 (t,  $J = 4.2$  Hz, 1H), 4.87 (t,  $J = 6.6$  Hz, 1H), 3.77 (dd,  $J = 18.0$  Hz, 7.2 Hz, 1H), 3.64 (dd,  $J = 18.0$  Hz, 6.6 Hz, 1H).

$^{13}\text{C}$  NMR (151 MHz,  $\text{CDCl}_3$ )  $\delta$  194.2, 137.0, 135.6, 134.0, 128.8, 128.1, 127.1, 126.7, 125.9, 119.7, 44.6, 27.2.

HRMS(ESI)  $m/z$ :  $\text{C}_{14}\text{H}_{11}\text{NOSK}$ ,  $[\text{M}+\text{K}]^+$ , Calcd: 241.0561, Found: 264.0419.

IR (KBr,  $\text{cm}^{-1}$ ) 2920, 2247, 1685, 1359, 1448, 1217, 1149, 761, 690.

#### 2-Cyclohexyl-4-oxo-4-phenylbutanenitrile (**5n**)<sup>[5]</sup>

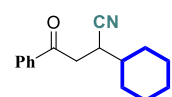

The title compound **5n** was prepared according to the general procedure as described, silica gel flash column chromatography was performed hexanes and ethyl acetate (10:1) ( $R_f = 0.40$  in hexane: ethyl acetate = 10:1) resulting in a colorless oil in 79% yield.

$^1\text{H}$  NMR (600 MHz,  $\text{CDCl}_3$ )  $\delta$  7.96 (d,  $J = 7.2$  Hz, 2H), 7.61 (t,  $J = 7.8$  Hz, 1H), 7.49 (t,  $J = 7.8$  Hz, 2H), 3.40-3.35 (m, 1H), 3.27-3.22 (m, 2H), 1.89-1.88 (m, 1H), 1.81-1.79 (m, 3H), 1.70-1.68 (m, 1H), 1.29-1.18 (m, 6H).

$^{13}\text{C}$  NMR (151 MHz,  $\text{CDCl}_3$ )  $\delta$  195.5, 136.0, 133.7, 128.8, 128.0, 120.9, 38.9, 38.4, 32.5, 31.4, 29.1, 25.9, 25.8, 25.8.

HRMS(ESI)  $m/z$ :  $\text{C}_{16}\text{H}_{20}\text{NO}$ ,  $[\text{M}+\text{H}]^+$ , Calcd: 242.1539, Found: 242.1538.

IR (KBr,  $\text{cm}^{-1}$ ) 2924, 2235, 1681, 1593, 1448, 1361, 1219, 767, 688, 599.

#### 2-benzyl-4-hydroxy-4-phenylbutanenitrile (**6**)

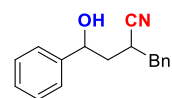

The title compound **6** was prepared according to the general procedure as described, silica gel flash column chromatography was performed hexanes and ethyl acetate (8:1) ( $R_f = 0.30$  in hexane: ethyl acetate = 5:1) resulting in a colorless crystal in 42% yield.

$^1\text{H}$  NMR (400 MHz,  $\text{CDCl}_3$ )  $\delta$  7.36-7.23 (m, 10H), 4.96 (d,  $J = 8.0$  Hz, 1H), 3.33-3.26 (m, 1H), 2.92 (d,



$J = 8.0$  Hz, 2H), 2.06 (s, 1H), 2.00-1.84 (m, 2H).

$^{13}\text{C}$  NMR (101 MHz,  $\text{CDCl}_3$ )  $\delta$  143.6, 136.7, 129.0, 128.7, 128.0, 127.2, 125.5, 121.5, 71.7, 41.2, 38.51, 30.80.

HRMS(ESI)  $m/z$ :  $\text{C}_{17}\text{H}_{18}\text{NO}$ ,  $[\text{M}+\text{H}]^+$ , Calcd: 252.1383, Found: 252.1383.

IR (KBr,  $\text{cm}^{-1}$ ) 2912, 2234, 1595, 1444, 1352, 1205, 1110, 821, 761, 595.

### 2-benzyl-4-oxo-4-phenylbutanoic acid (**7**)<sup>[9]</sup>

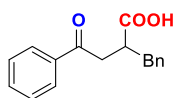

The title compound **7** was prepared according to the general procedure as described, without further purification resulting in a white crystal in 92% yield.

$^1\text{H}$  NMR (400 MHz,  $\text{CDCl}_3$ )  $\delta$  7.89 (t,  $J = 8.0$  Hz, 2H), 7.55 (t,  $J = 8.0$  Hz, 1H), 7.43 (t,  $J = 8.0$  Hz, 2H), 7.30 (t,  $J = 8.0$  Hz, 2H), 7.23 (t,  $J = 8.0$  Hz, 3H), 3.43-3.35 (m, 2H), 3.21 (dd,  $J = 16.0, 4.0$  Hz, 1H), 3.07-2.99 (m, 1H), 2.88 (dd,  $J = 16$  Hz, 8.0 Hz, 1H).

$^{13}\text{C}$  NMR (101 MHz,  $\text{CDCl}_3$ )  $\delta$  198.0, 143.6, 136.7, 129.0, 128.7, 128.0, 127.2, 125.5, 121.5, 71.7, 41.2, 38.5, 30.8.

HRMS(ESI)  $m/z$ :  $\text{C}_{17}\text{H}_{18}\text{NO}$ ,  $[\text{M}+\text{H}]^+$ , Calcd: 269.1172, Found: 269.1171.

IR (KBr,  $\text{cm}^{-1}$ ) 3125, 2920, 1678, 1592, 1448, 1350, 1205, 1115, 993, 821, 756, 695, 599.

## V References

- [1] Aramini, A.; Sablone, M. R.; Bianchini, G.; Amore, A.; Fan ò M.; Perrone, P.; Dolce, A.; Allegritti, M., Facile one-pot preparation of 2-arylpropionic and arylacetic acids from cyanohydrins by treatment with aqueous HI. *Tetrahedron*. **2009**, 65, 2015-2021.
- [2] Hudlicky, J. R.; Werner, L.; Semak, V.; Simionescu, R.; Hudlicky, T., Dauben–Michno oxidative transposition of allylic cyanohydrins-Enantiomeric switch of (–)-carvone to (+)-carvone. *Can. J. Chem.* **2011**, 89, 535-543.
- [3] Wu, Z.; Li, T.; Ding, Y.; Hu, A., Synthesis of Chiral Porous Organic Polymers Through Nucleophilic Substitution for Chiral Separation. *ACS Appl. Polym. Mater.* **2020**, 2, 5414-5422.
- [4] Sartillo-Piscil, J. R.-I. S. C.-G. L. Q. F., Concise and Environmentally Friendly Asymmetric Total Synthesis of the Putative Structure of a Biologically Active 3-Hydroxy-2-piperidone Alkaloid. *Synthesis*. **2018**, 50, 2878-2886.
- [5] Li, Z. F.; Li, Q.; Ren, L. Q.; Li, Q. H.; Peng, Y. G.; Liu, T. L., Cyano-borrowing reaction: nickel-catalyzed direct conversion of cyanohydrins and aldehydes/ketones to beta-cyano ketone. *Chem. Sci.* **2019**, 10, 5787-5792.

- [6] Anders, E.; Stankowiak, A.; Riemer, R., Synthesen mit N-Trimethylsilylheteroarylium-Salzen: Umsetzungen mit Aldehyden, Ketonen und Carbonsäuren, Reaktivitätsvergleich mit analogen N-Acylheteroarylium-Salzen. *Synthesis*. **1987**, 1987, 929-931.
- [7] Provencher, B. A.; Bartelson, K. J.; Liu, Y.; Foxman, B. M.; Deng, L., Structural Study-Guided Development of Versatile Phase-Transfer Catalysts for Asymmetric Conjugate Additions of Cyanide. *Angew. Chem., Int. Ed.* **2011**, 50, 10565-10569.
- [8] Kuroono, N.; Nii, N.; Sakaguchi, Y.; Uemura, M.; Ohkuma, T., Asymmetric Hydrocyanation of  $\alpha,\beta$ -Unsaturated Ketones into  $\beta$ -Cyano Ketones with the  $[\text{Ru}(\text{phgly})_2(\text{binap})]/\text{C}_6\text{H}_5\text{OLi}$  Catalyst System. *Angew. Chem., Int. Ed.* **2011**, 50, 5541-5544.
- [9] Nashed, N. T.; Kaiser, E. T., Carboxypeptidase A catalyzed  $\alpha,\beta$ -elimination reactions: rapid catalysis of  $\alpha,\beta$ -elimination of hydrogen chloride from  $\beta$ -chloro ketone substrates. *J. Am. Chem. Soc.* **1986**, 108, 2710-2715.

## VI NMR spectra of the products

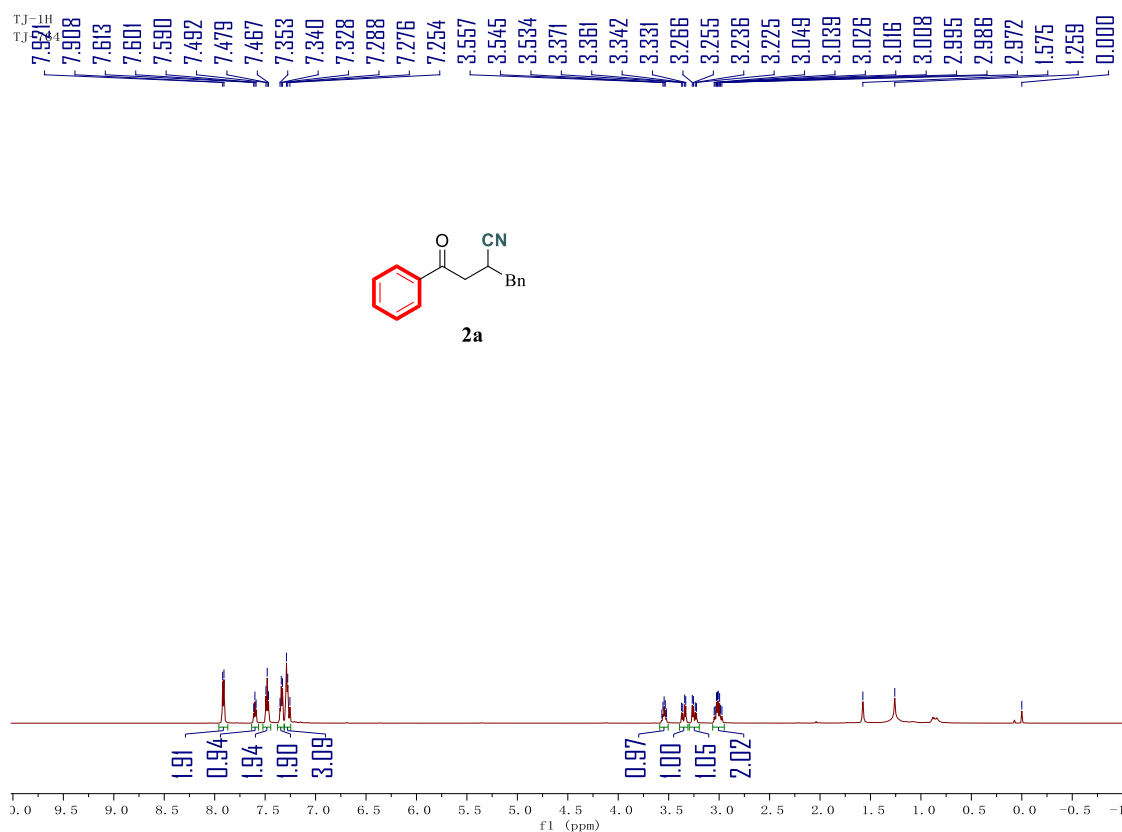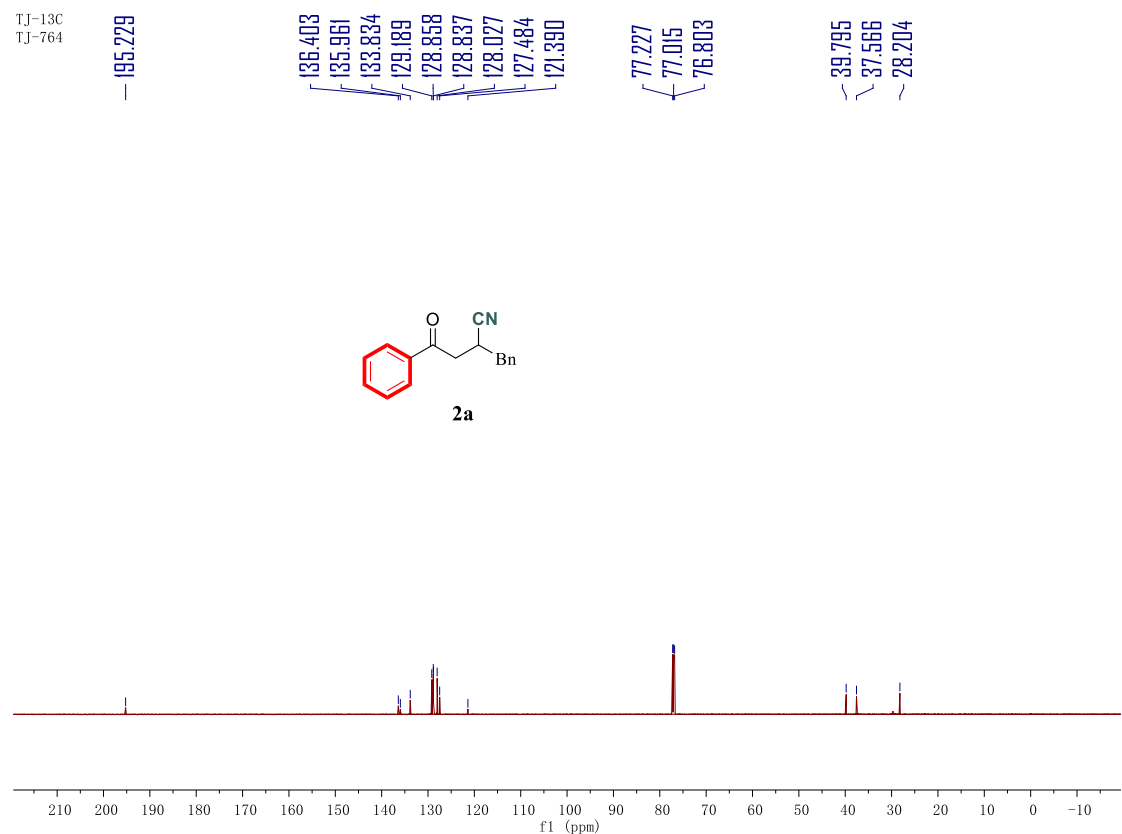

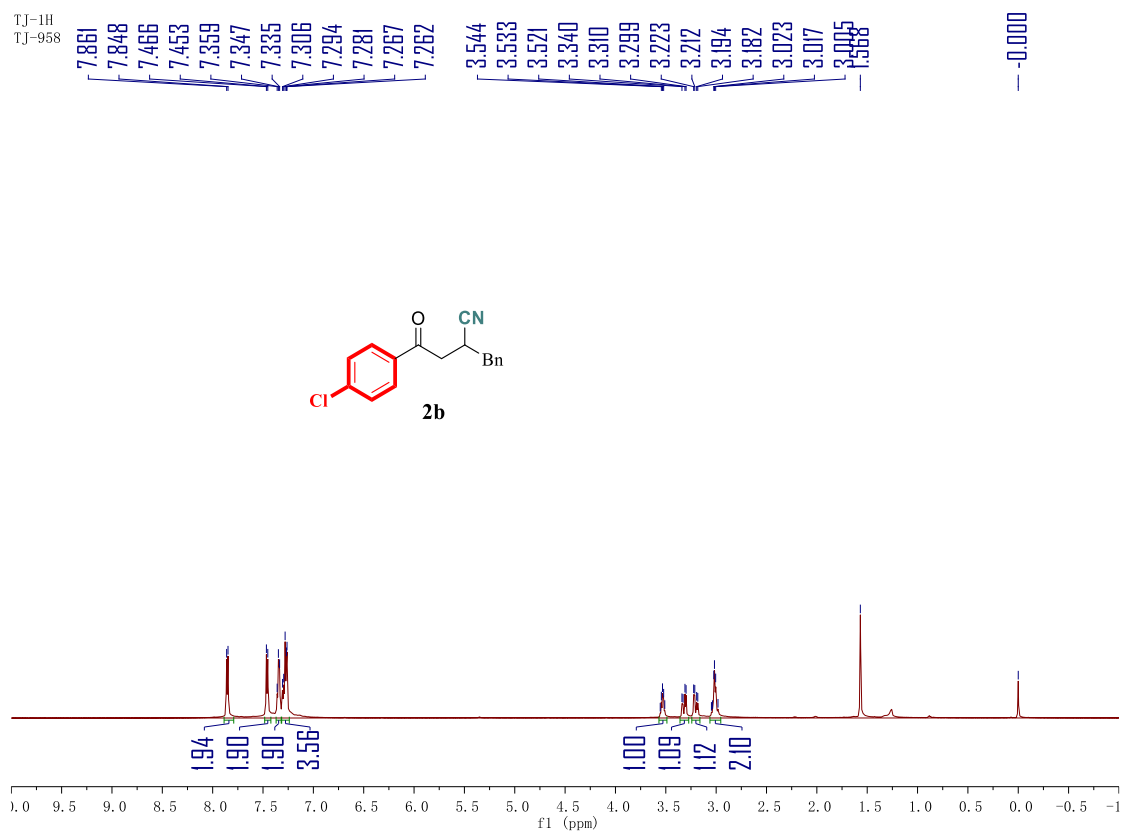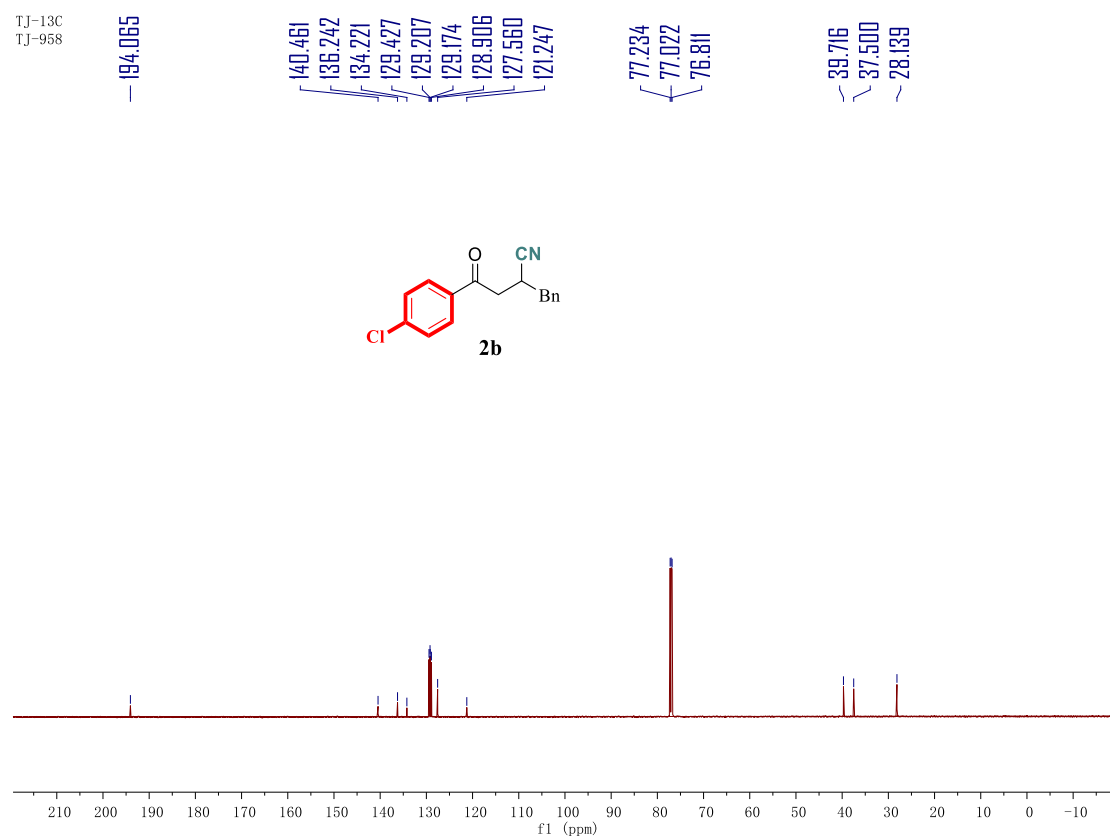

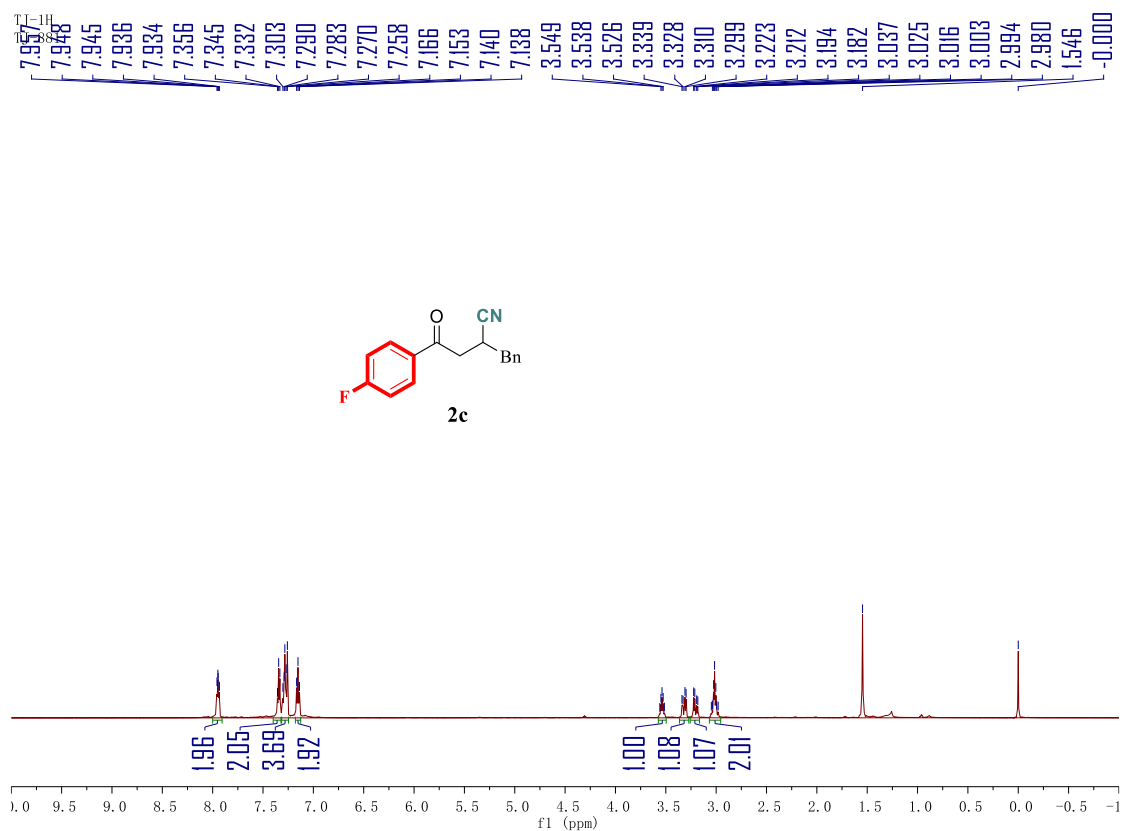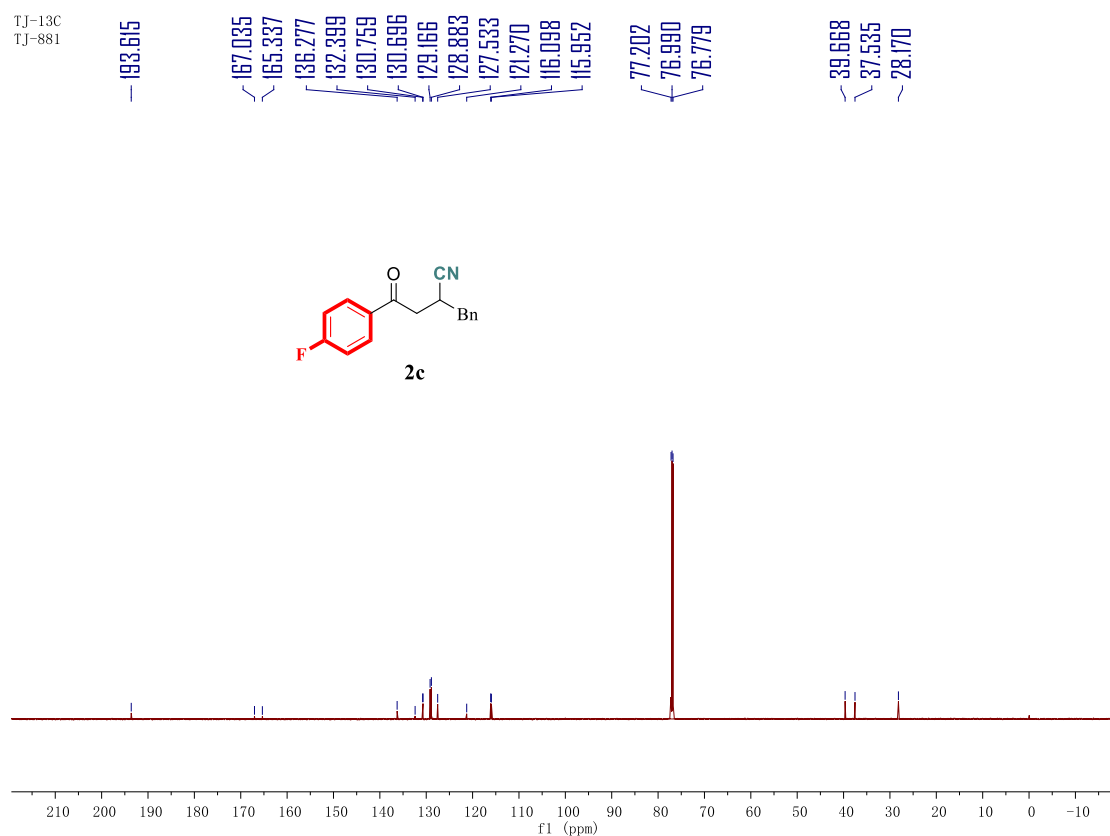

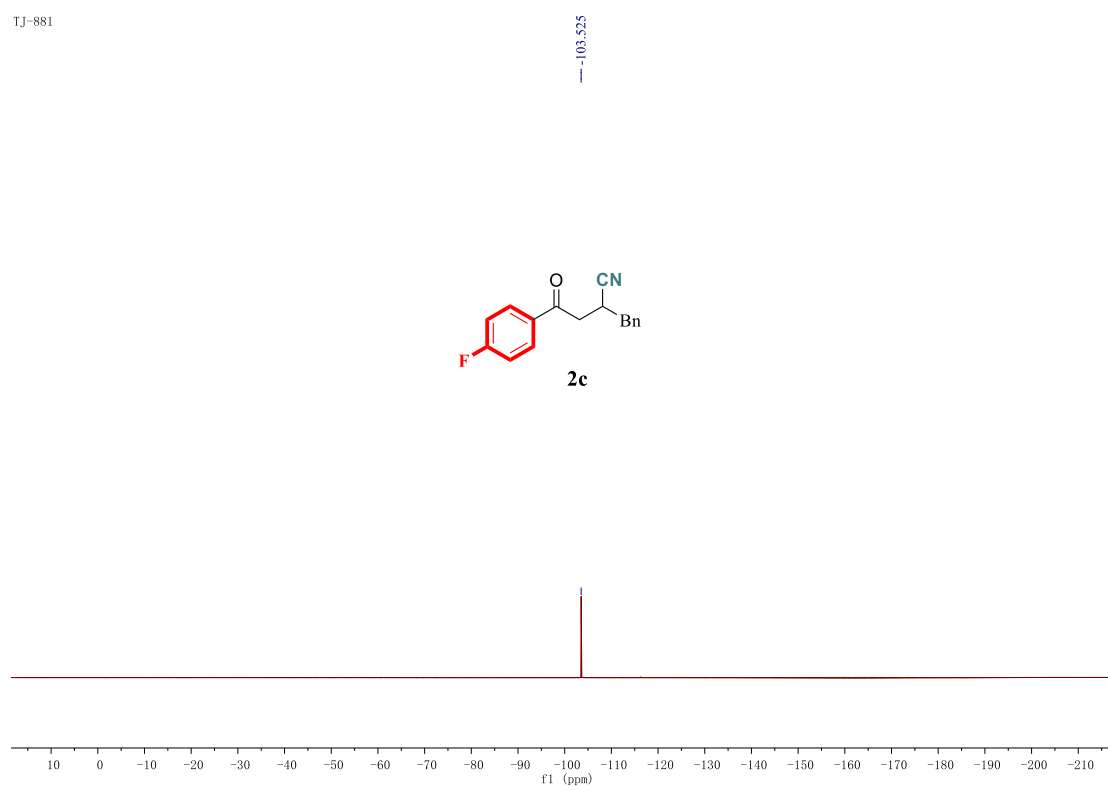

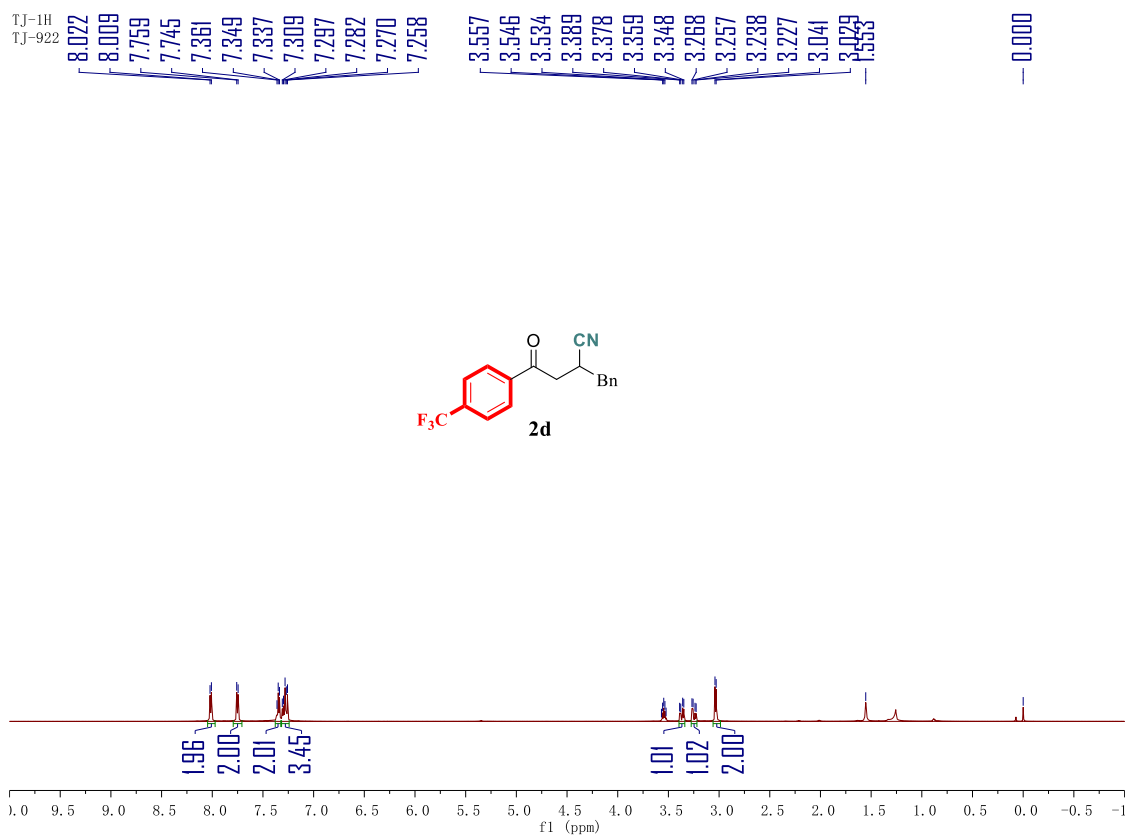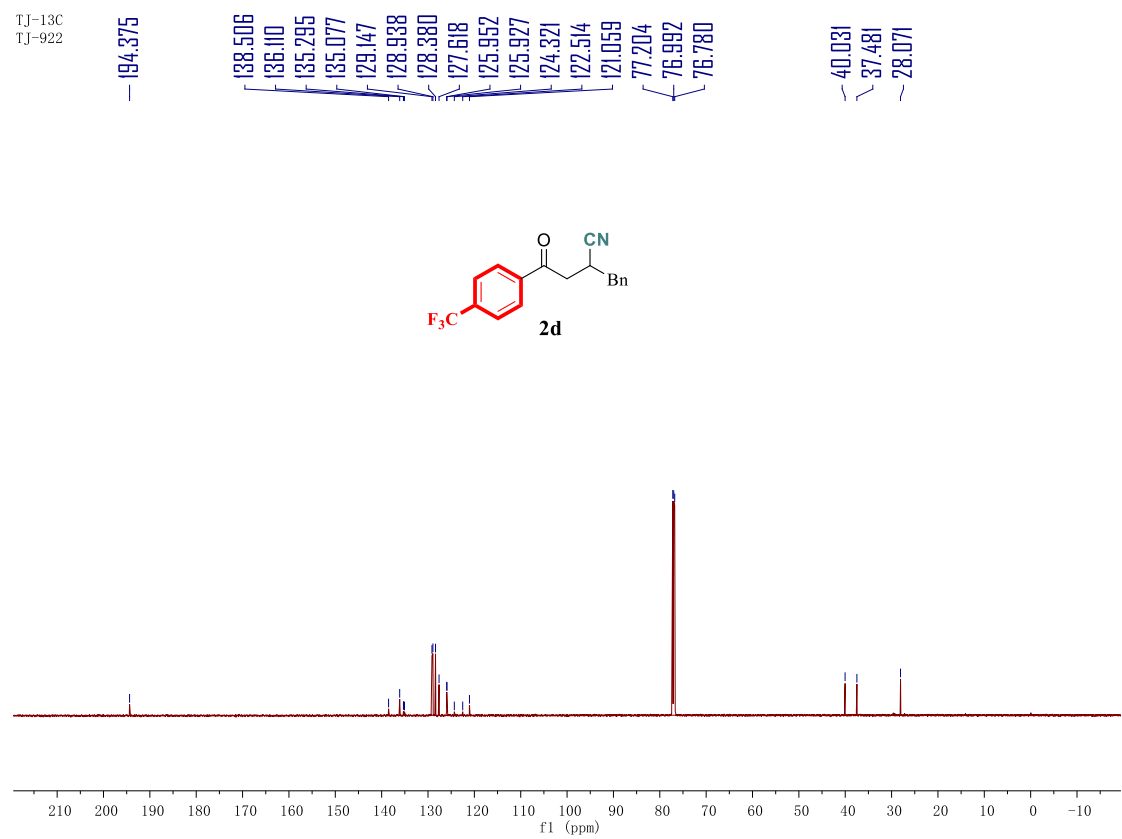

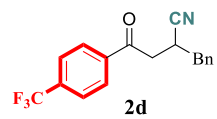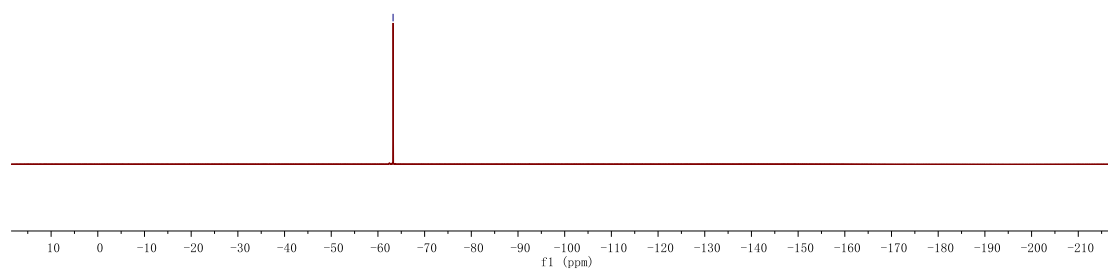



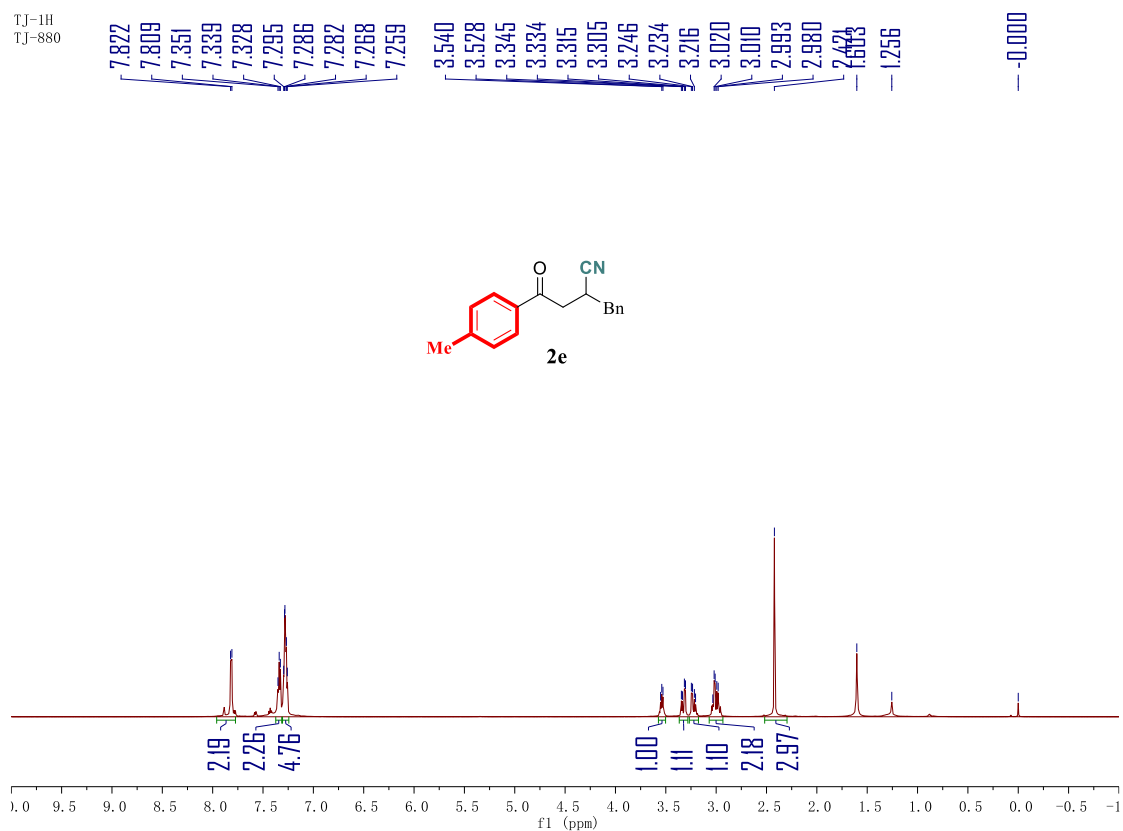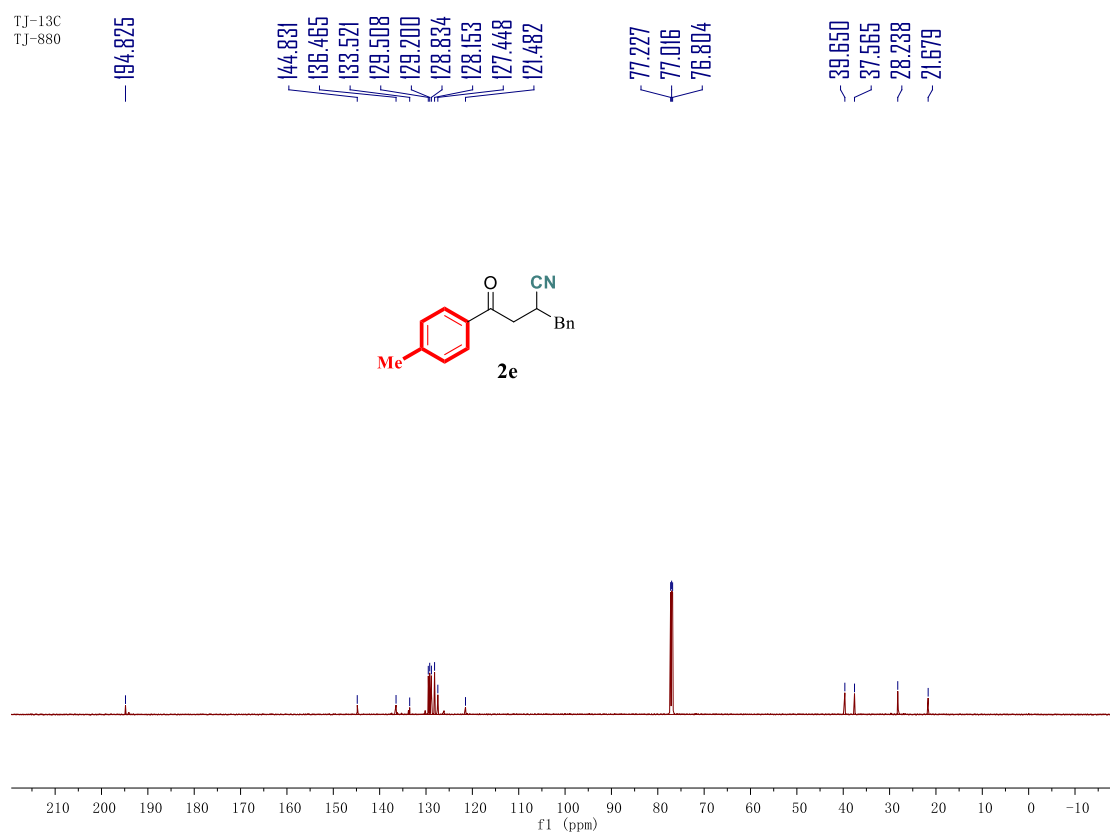

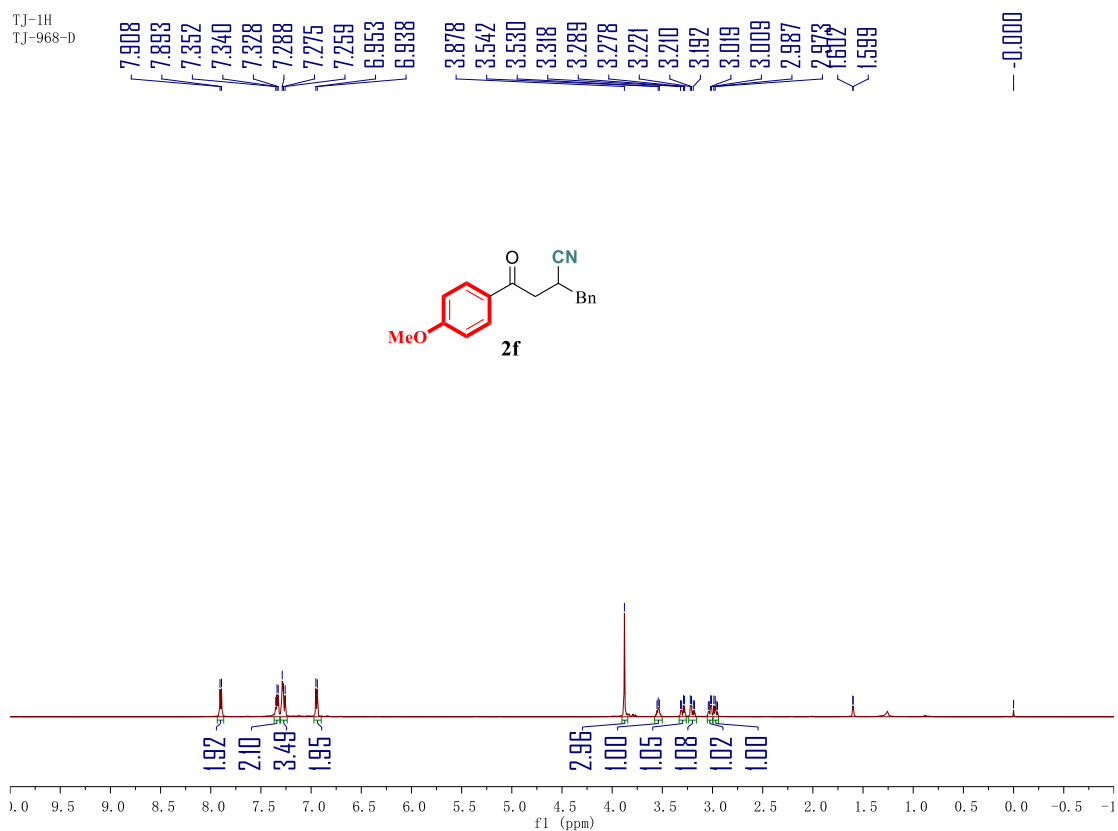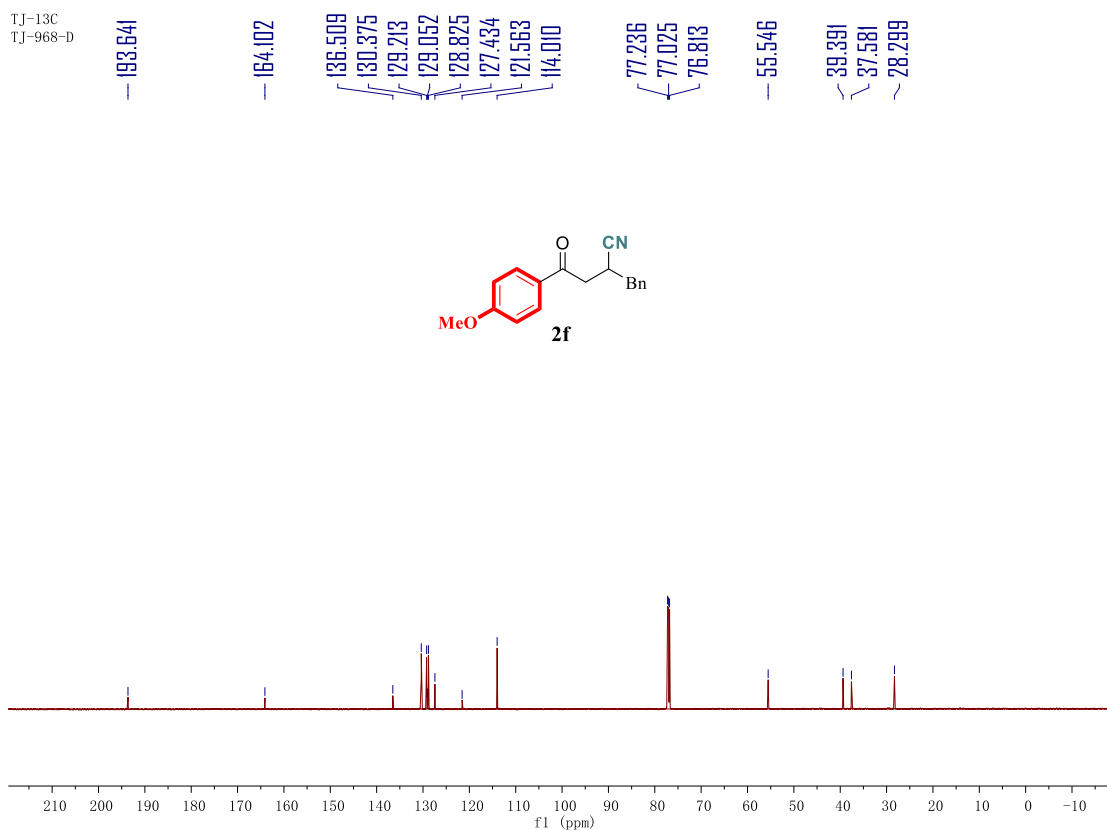

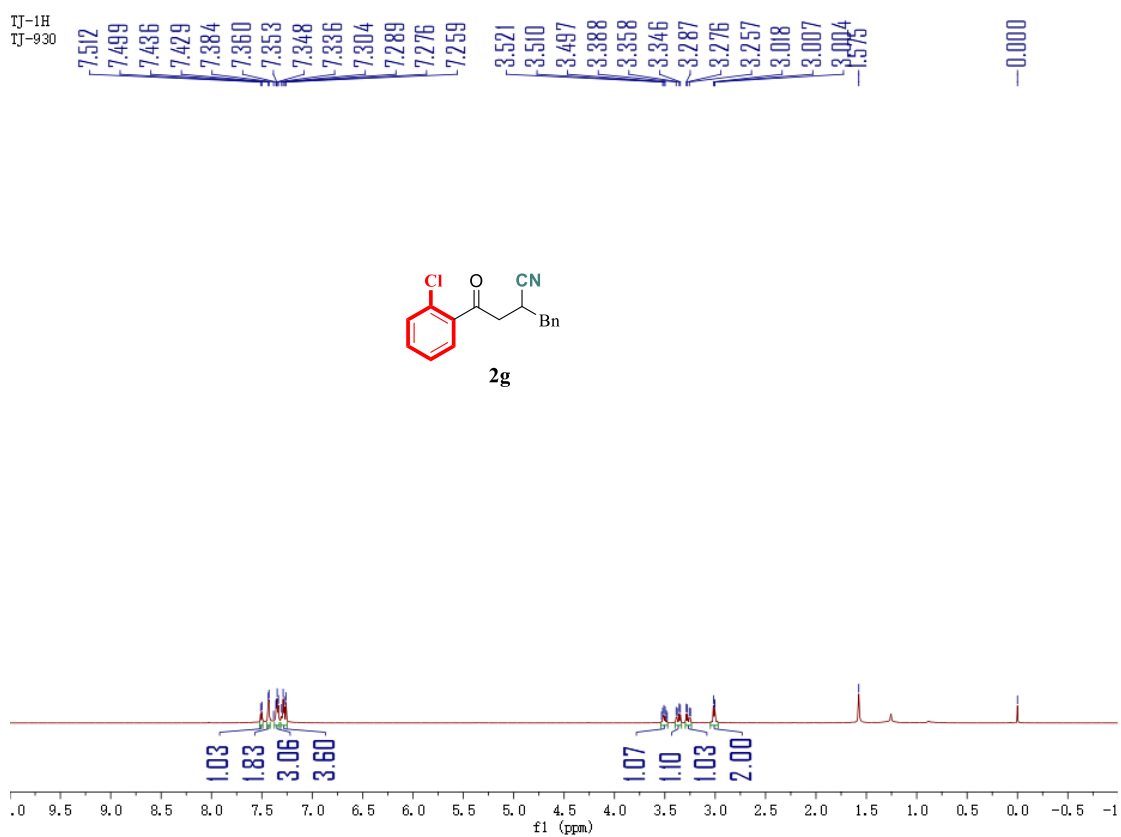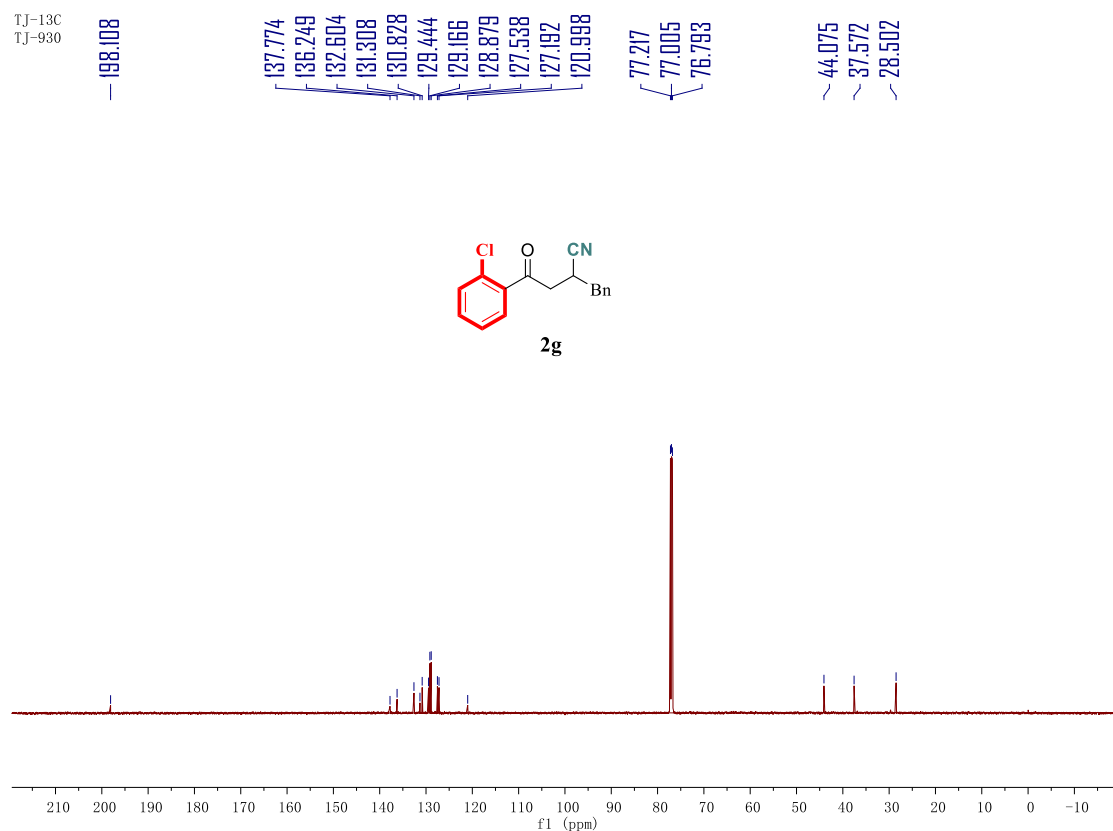

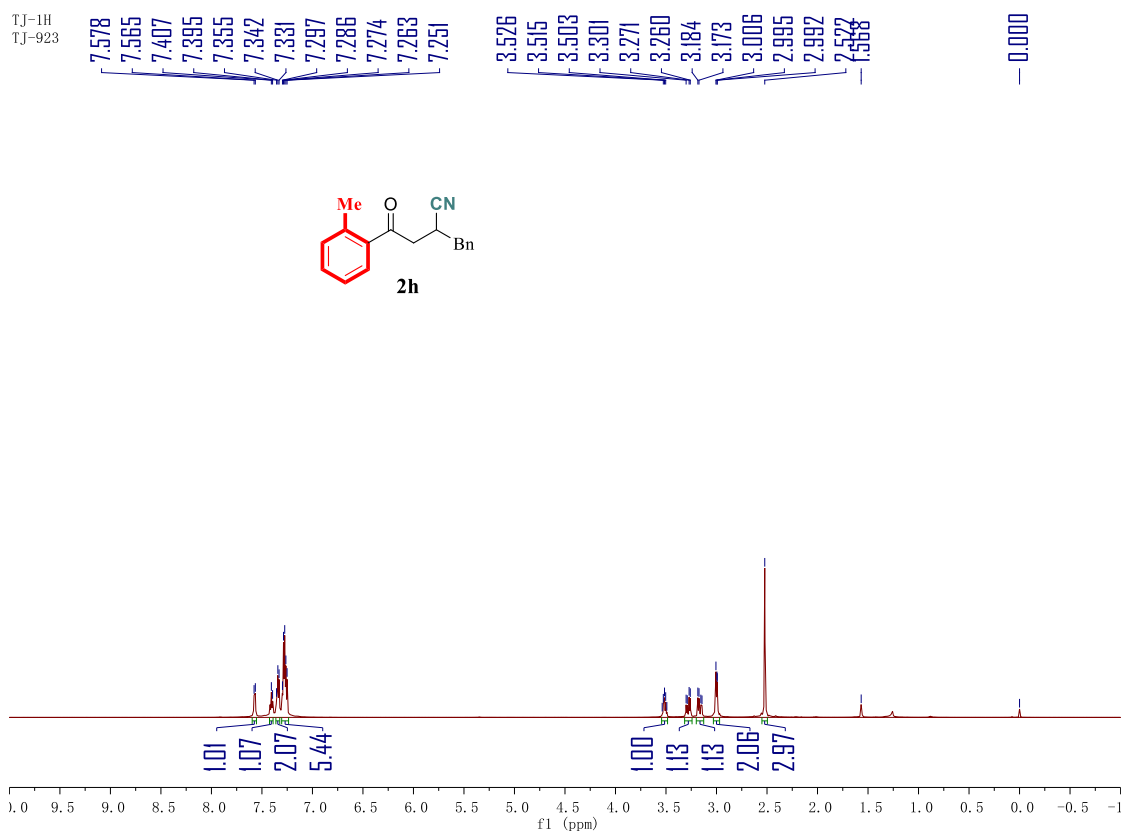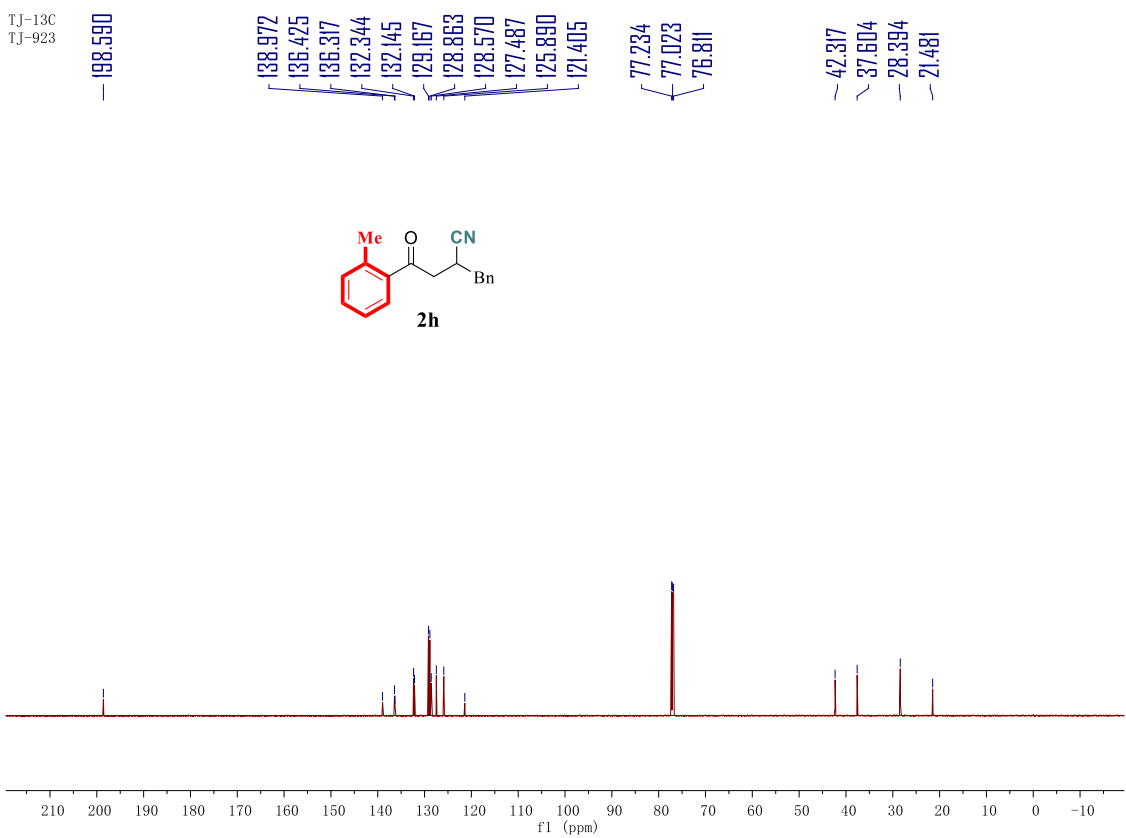

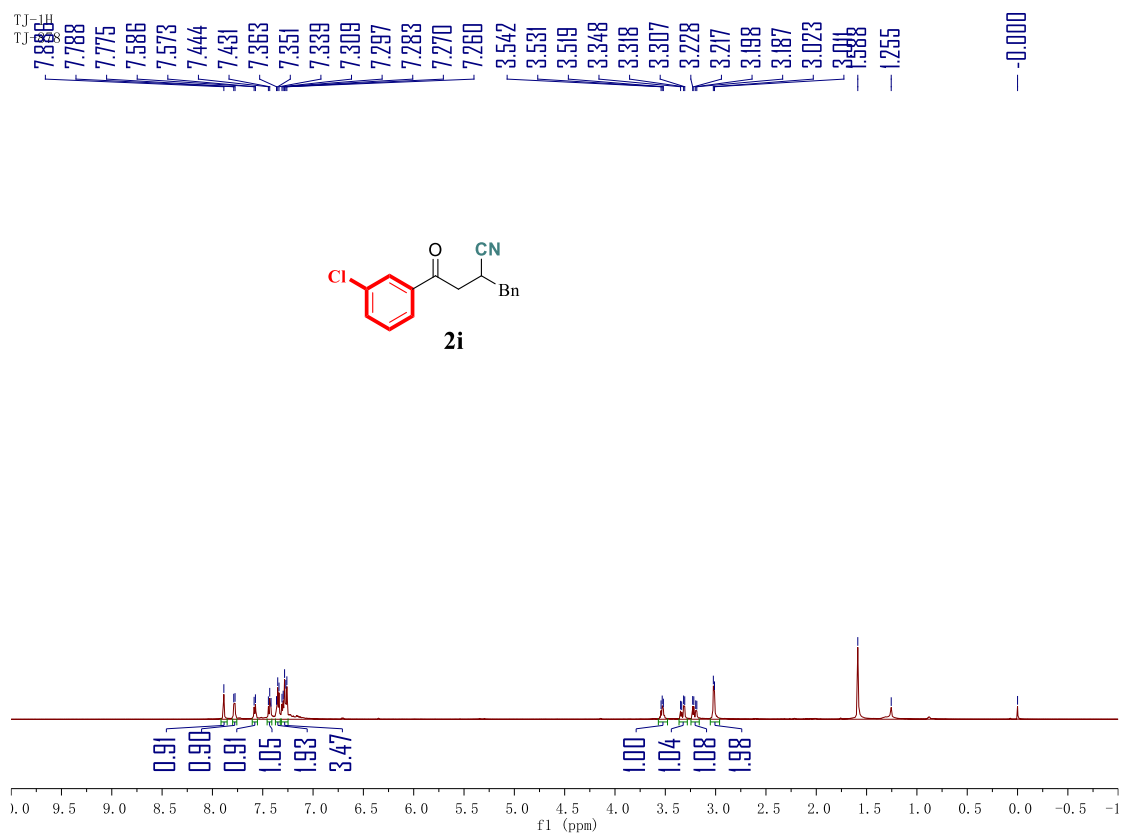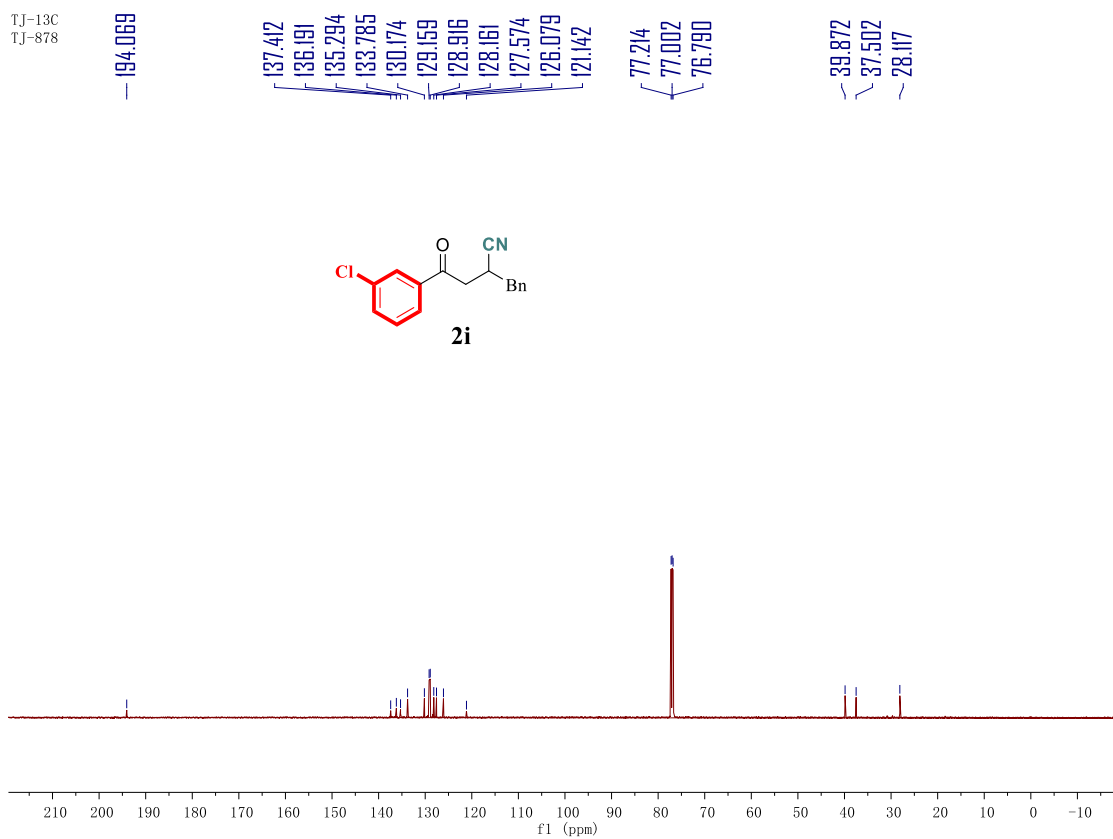

TJ-1H  
TJ-879

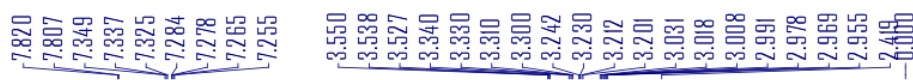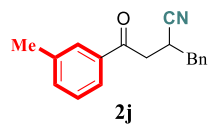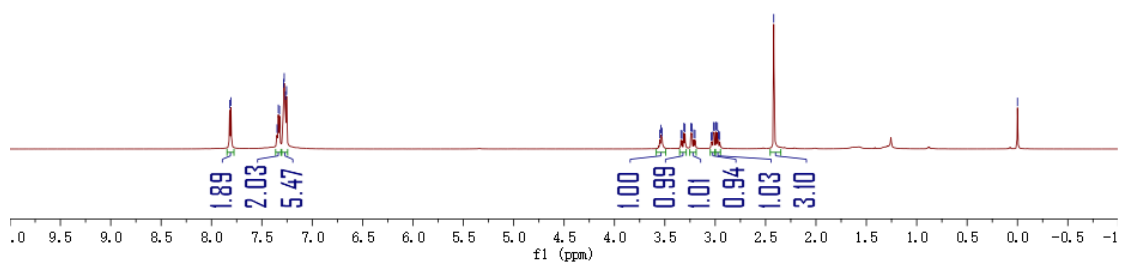

TJ-13C  
TJ-879

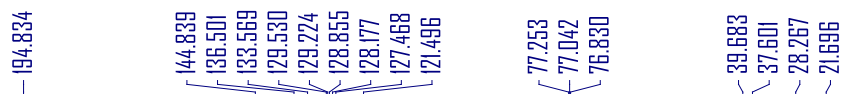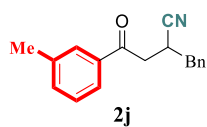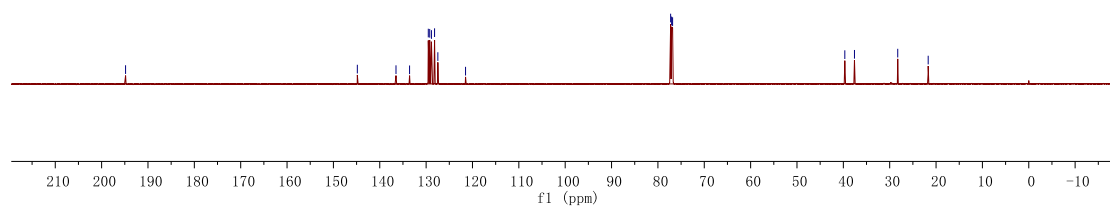

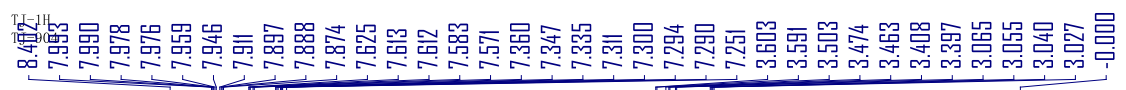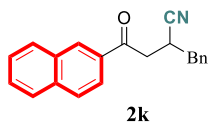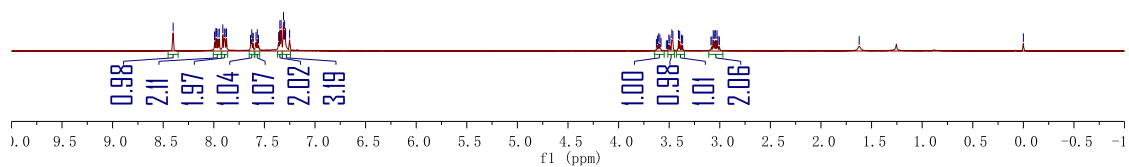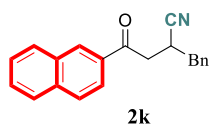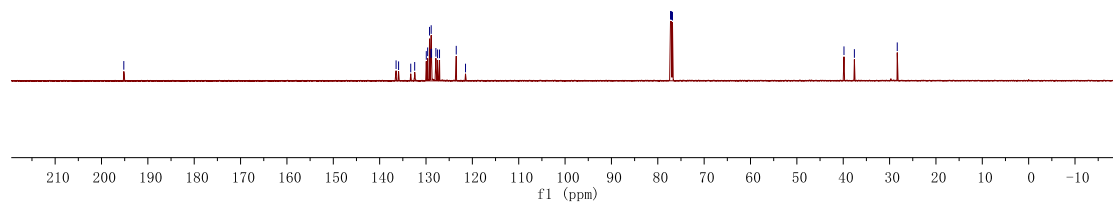

TJ-1H  
TJ-962

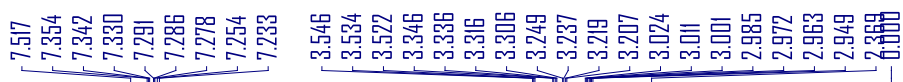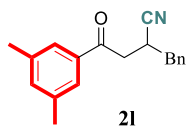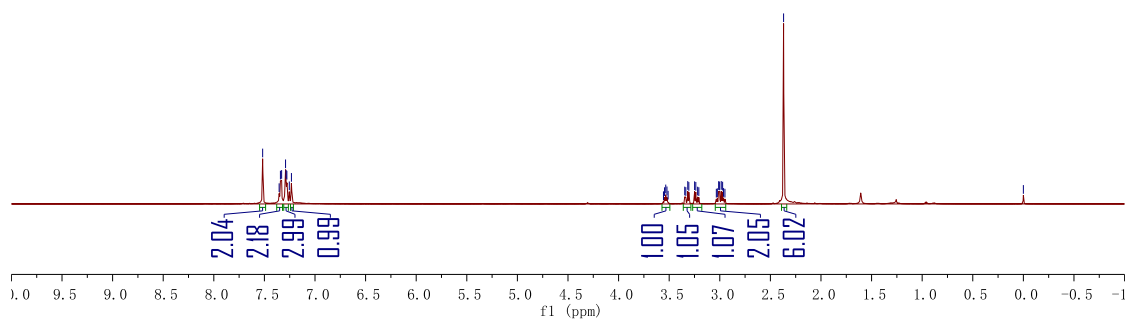

TJ-13C  
TJ-962

195.614

138.542  
136.506  
135.091  
135.480  
129.207  
128.831  
127.435  
125.835  
121.467

77.238  
77.026  
76.815

39.881  
37.566  
28.292  
21.196

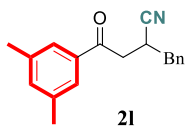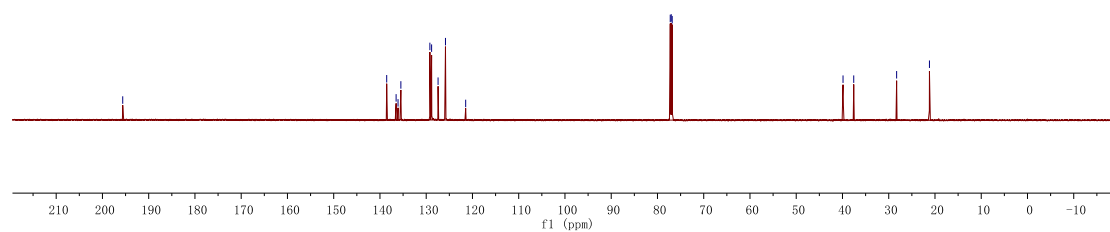



TJ-1H  
TJ-989

7.355 7.344 7.331 7.301 7.289 7.276 7.260 7.244 7.232 3.333 3.321 3.310 3.298 3.286 2.917 2.906 2.833 2.822 2.803 2.791 2.698 2.687 2.668 2.657 2.174 1.594 0.000

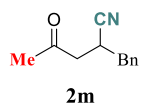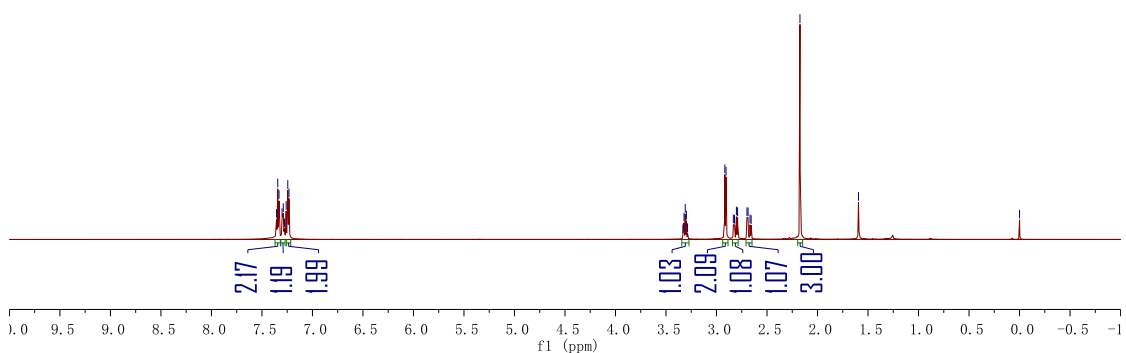

TJ-13C  
TJ-989

203.553 136.260 129.116 128.855 127.501 121.152 77.235 77.023 76.811 44.288 37.369 29.942 27.765

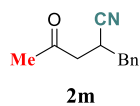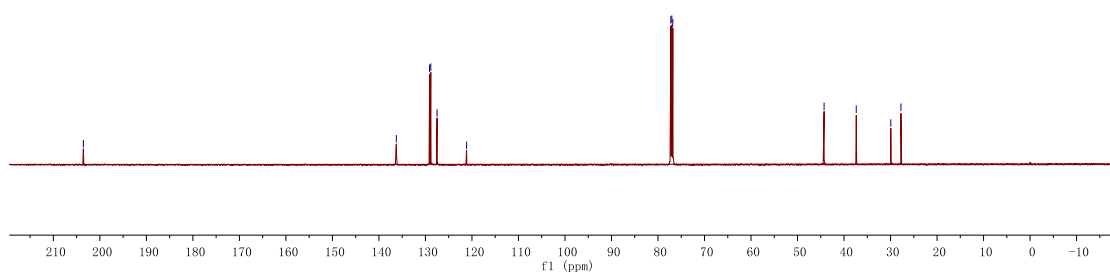

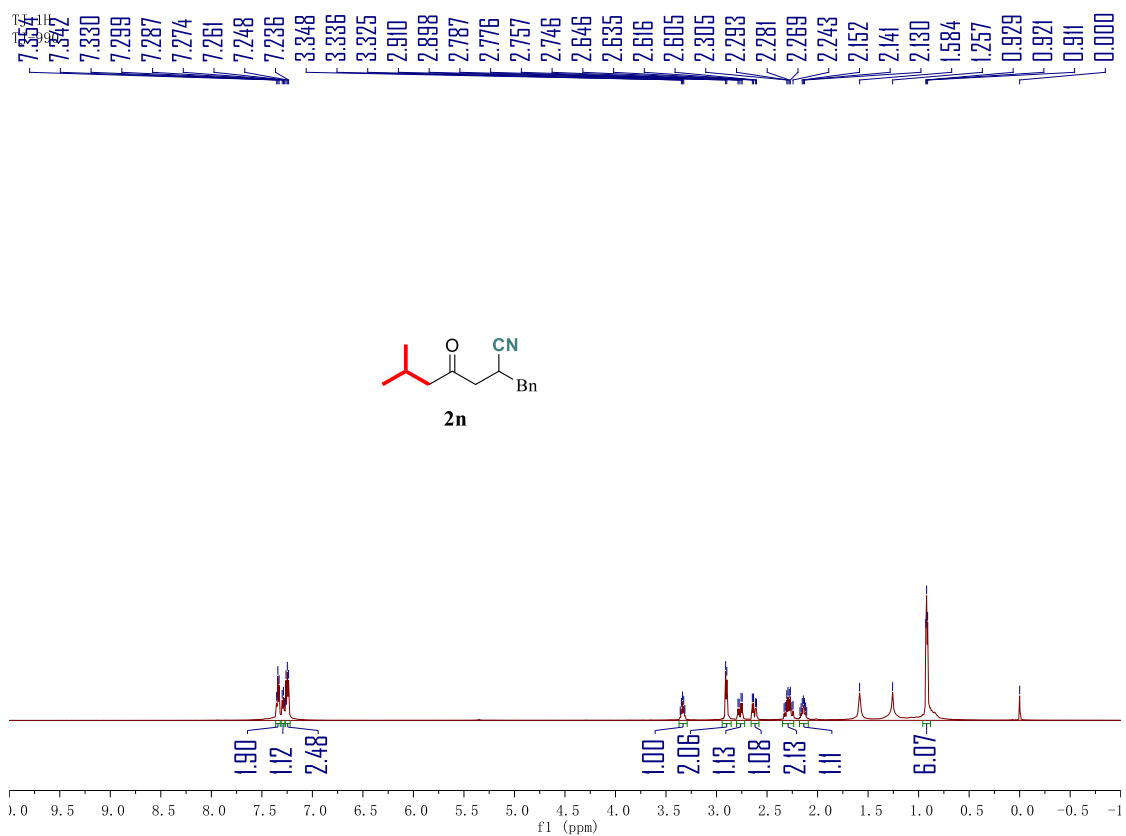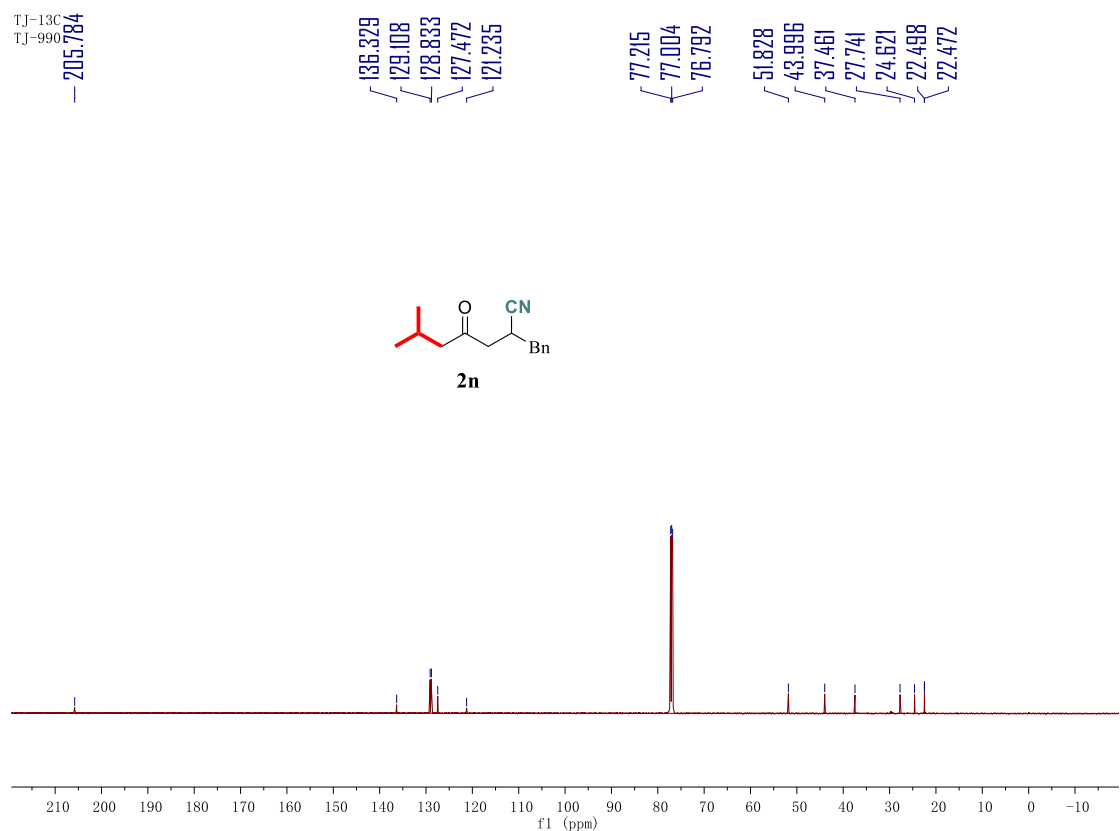

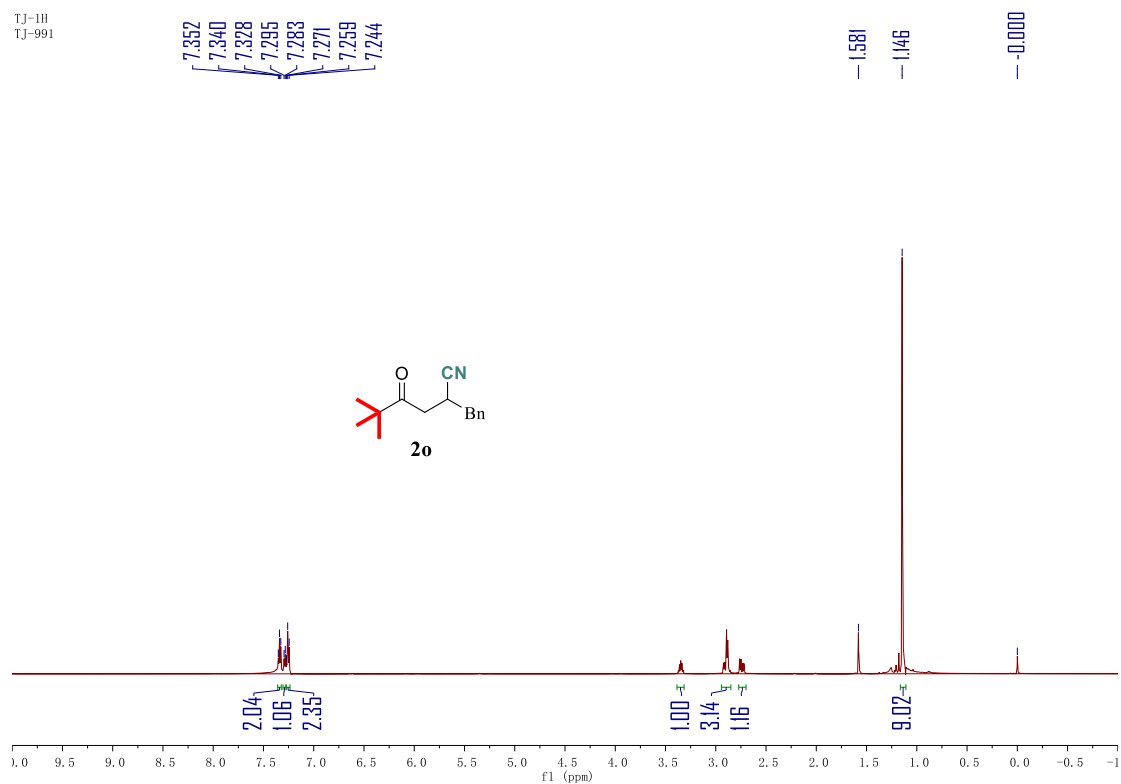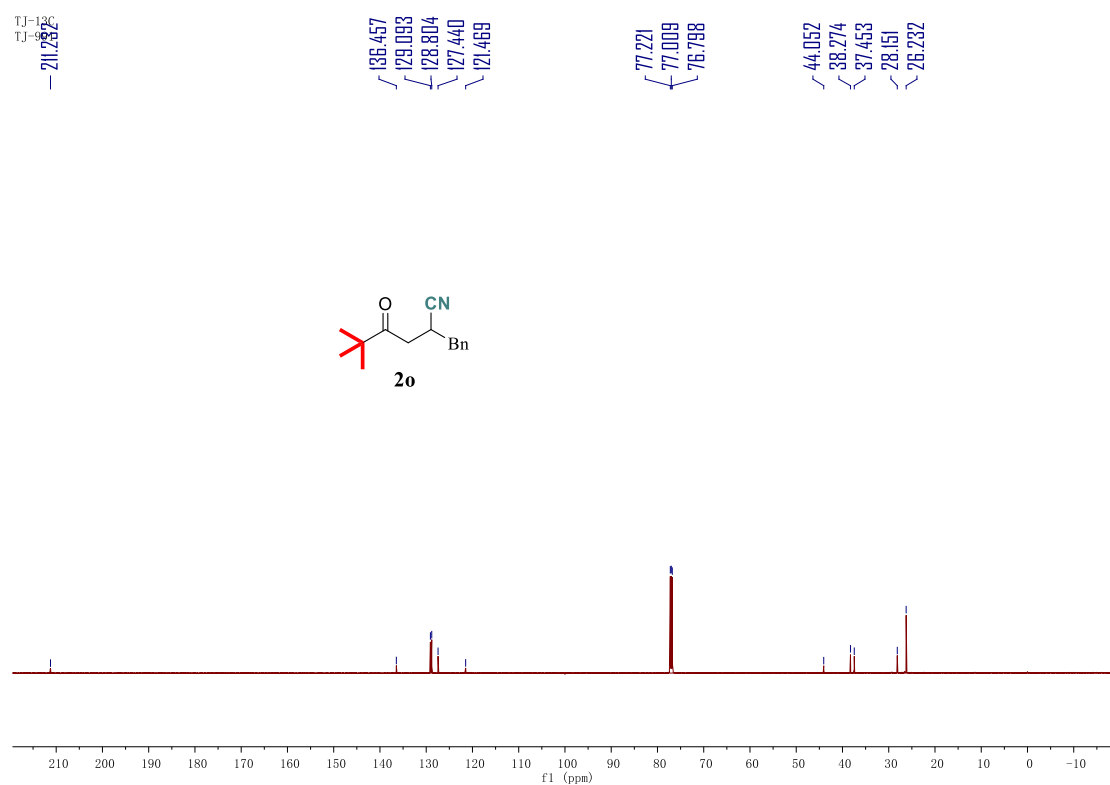

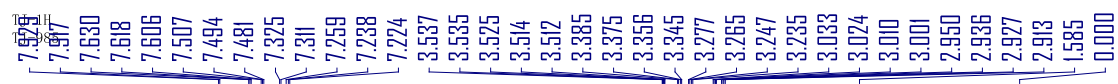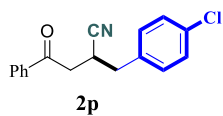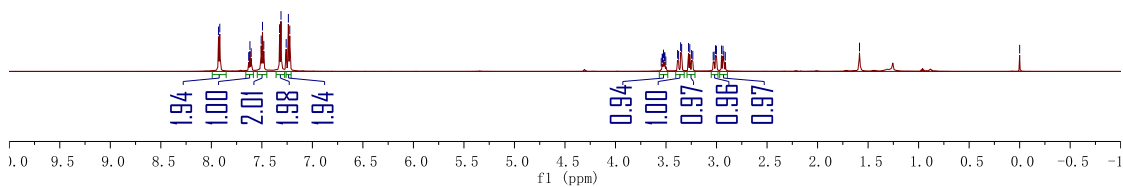

TJ-13C  
TJ-985

195.045

135.833  
134.883  
133.967  
133.523  
130.541  
129.046  
128.895  
128.026  
121.119

77.227  
77.015  
76.803

39.729  
36.888  
28.198

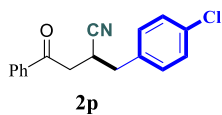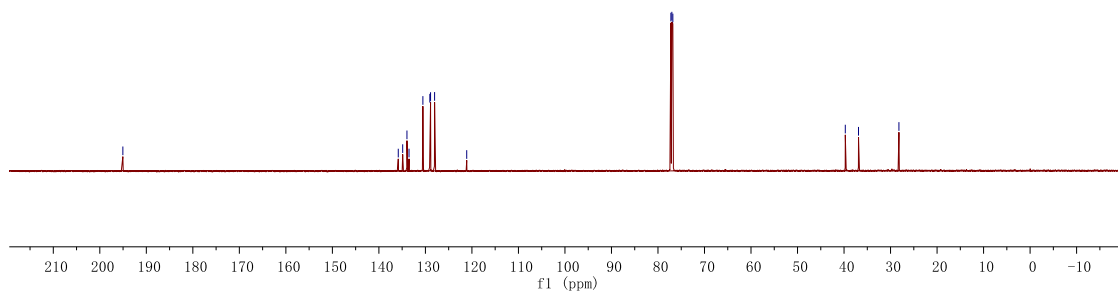

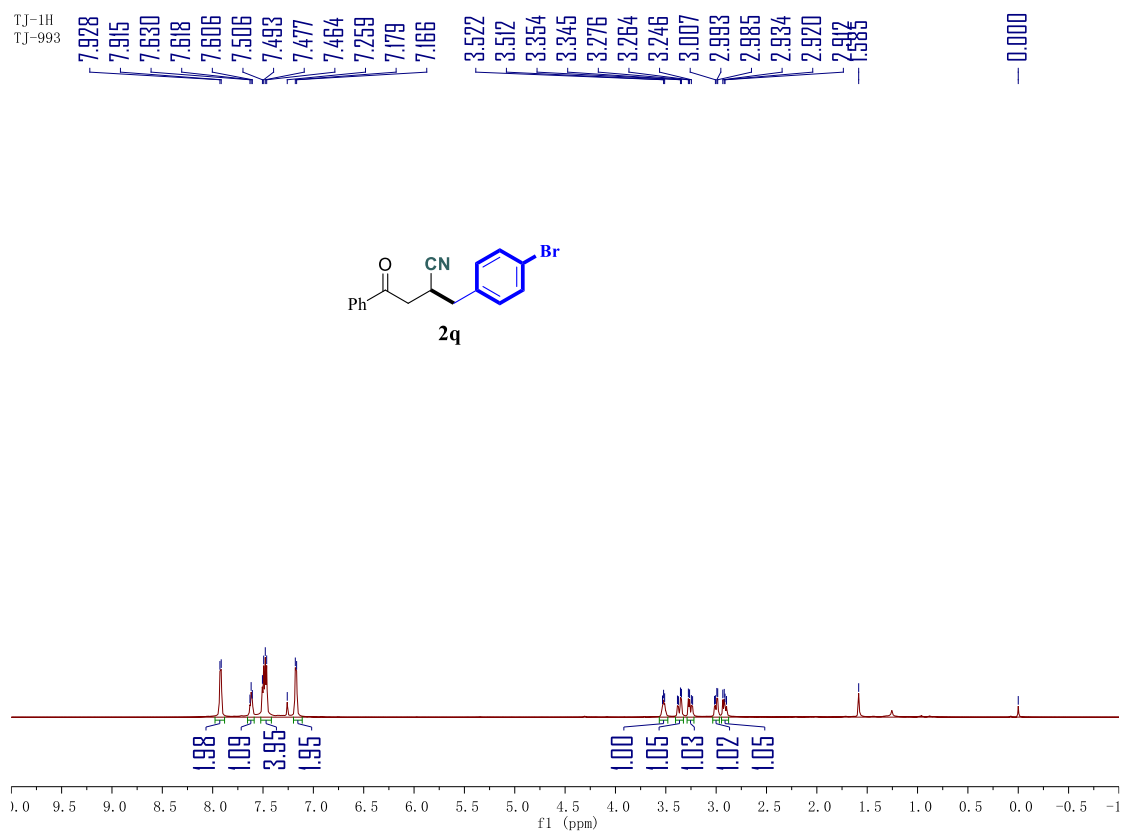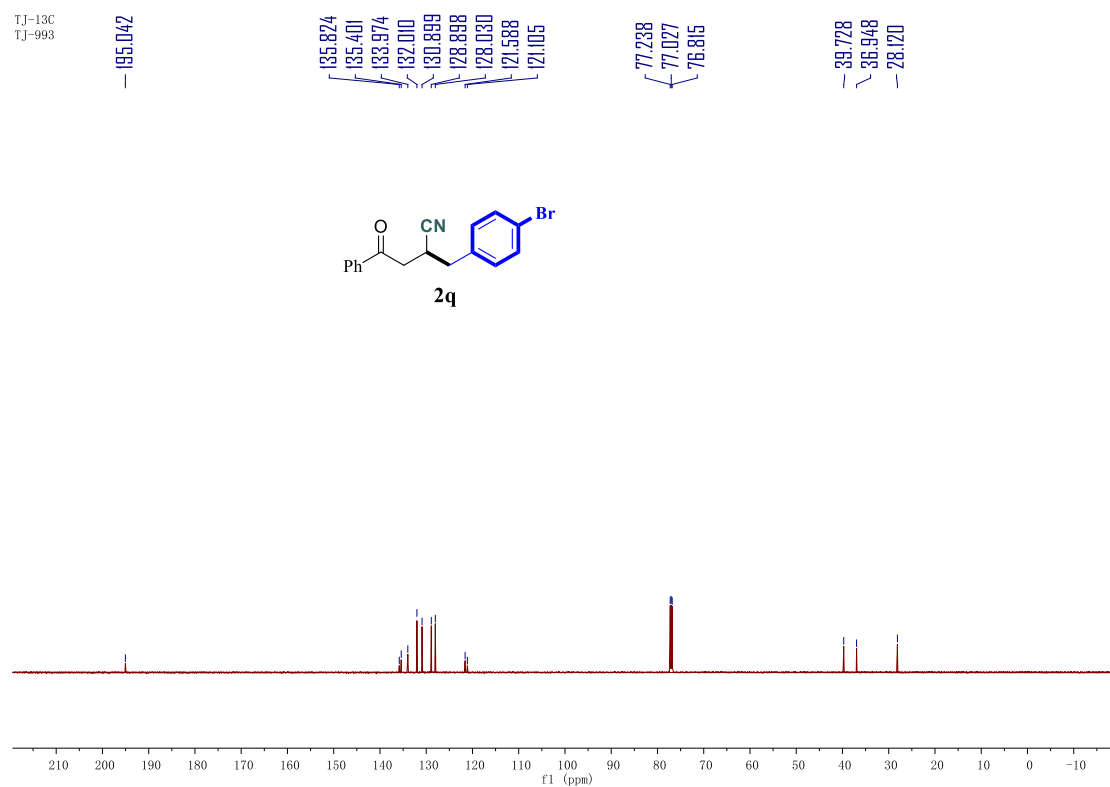

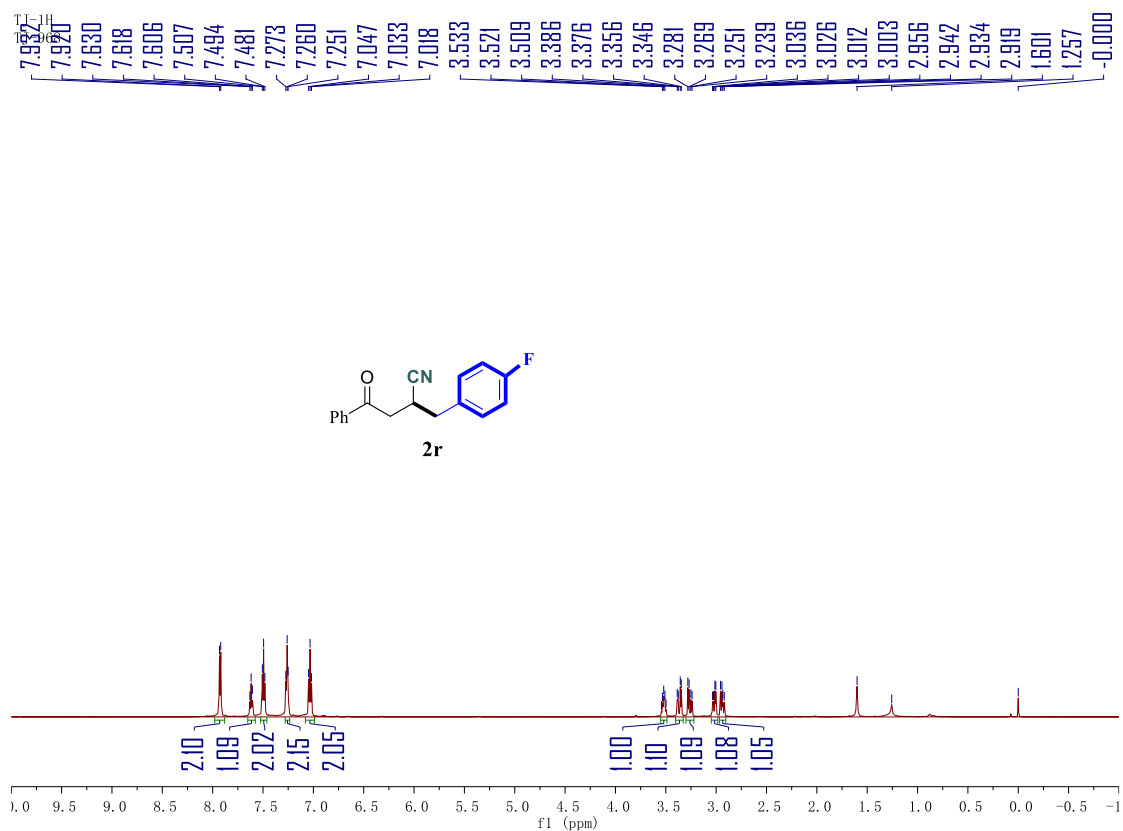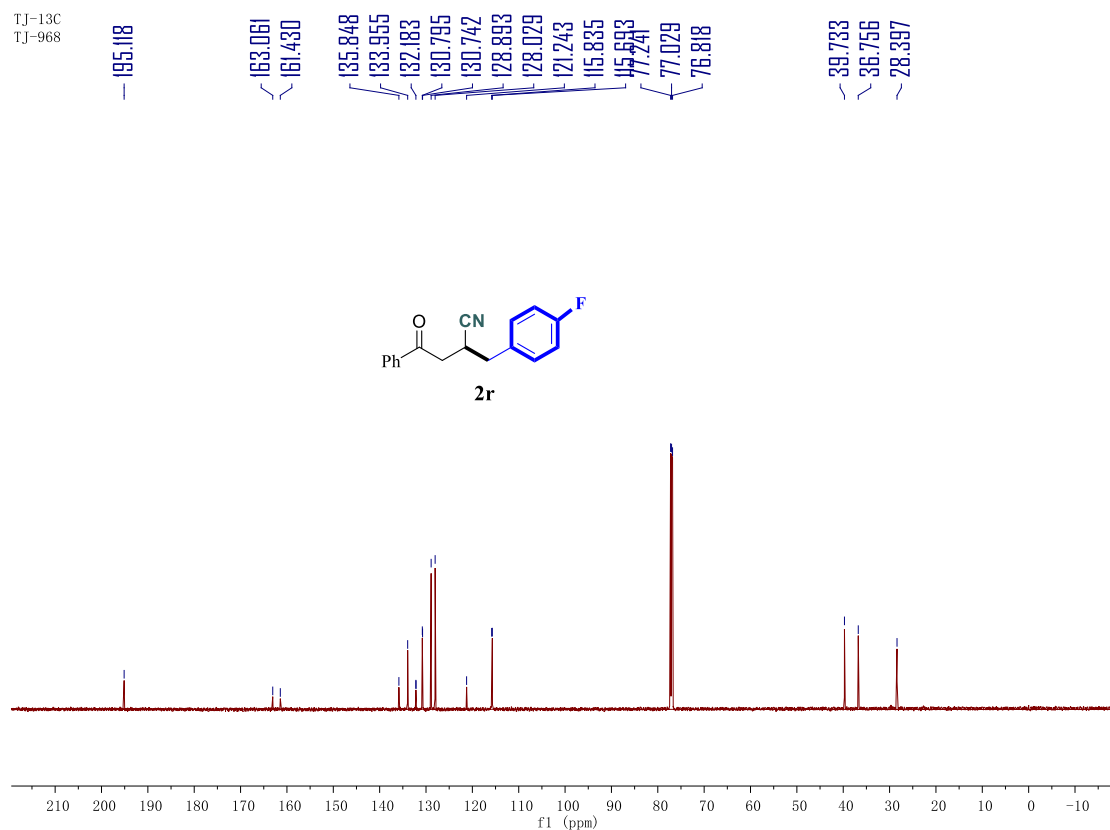

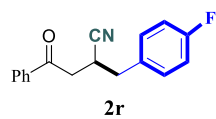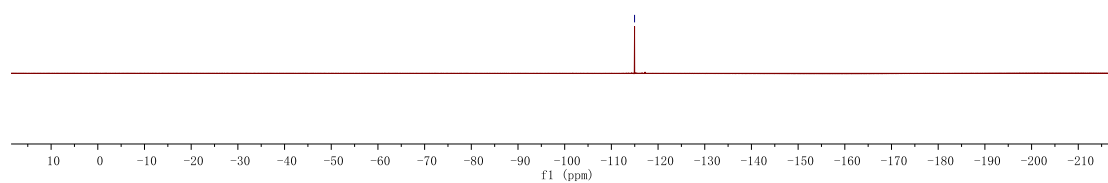

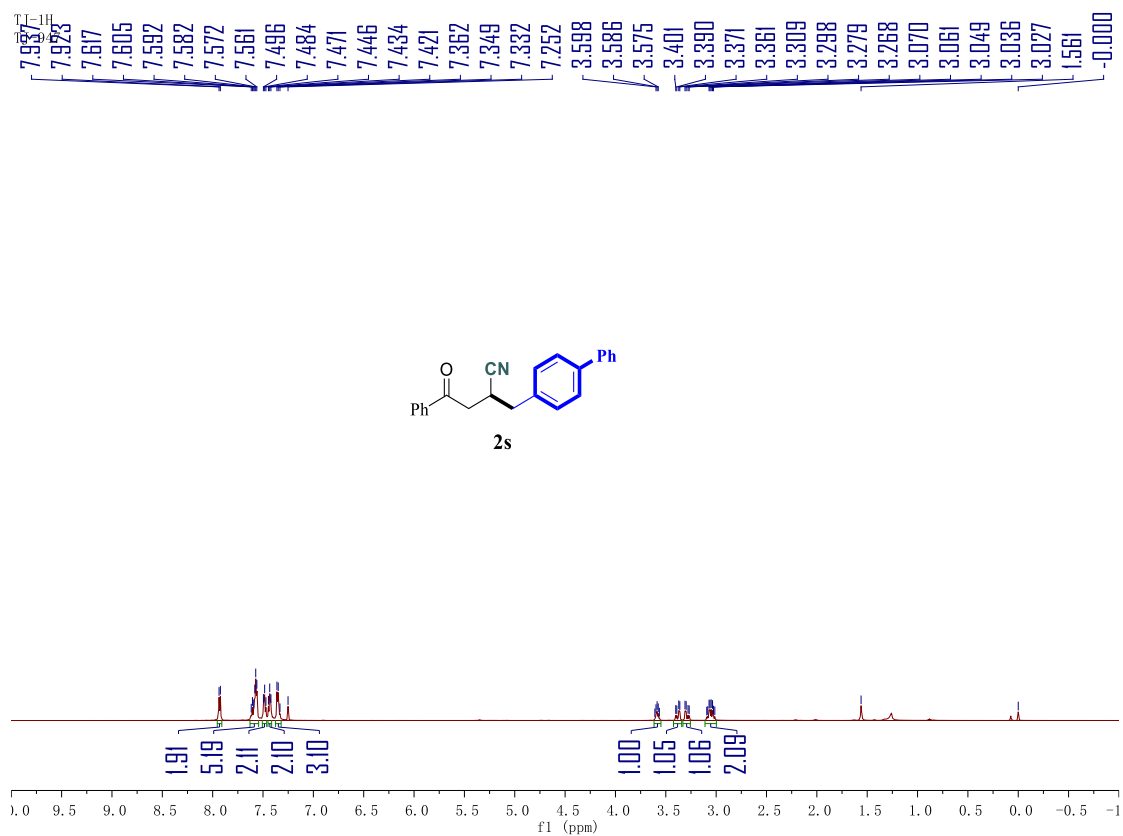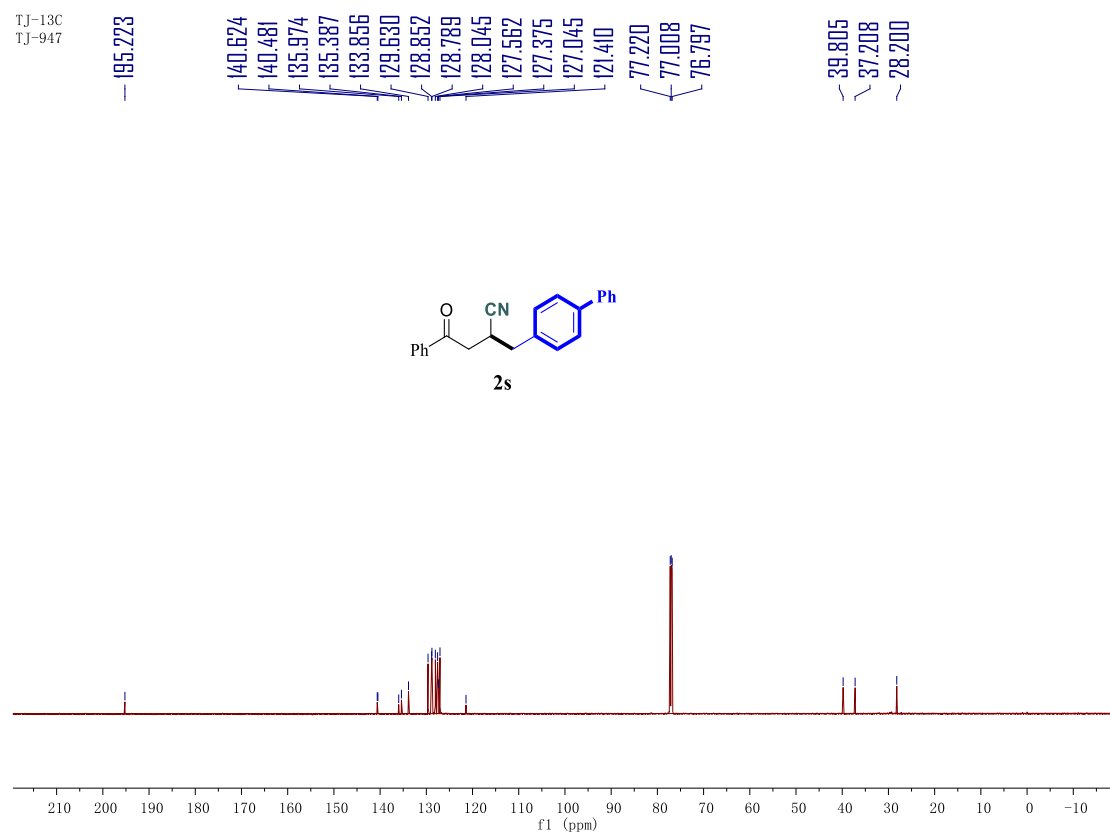



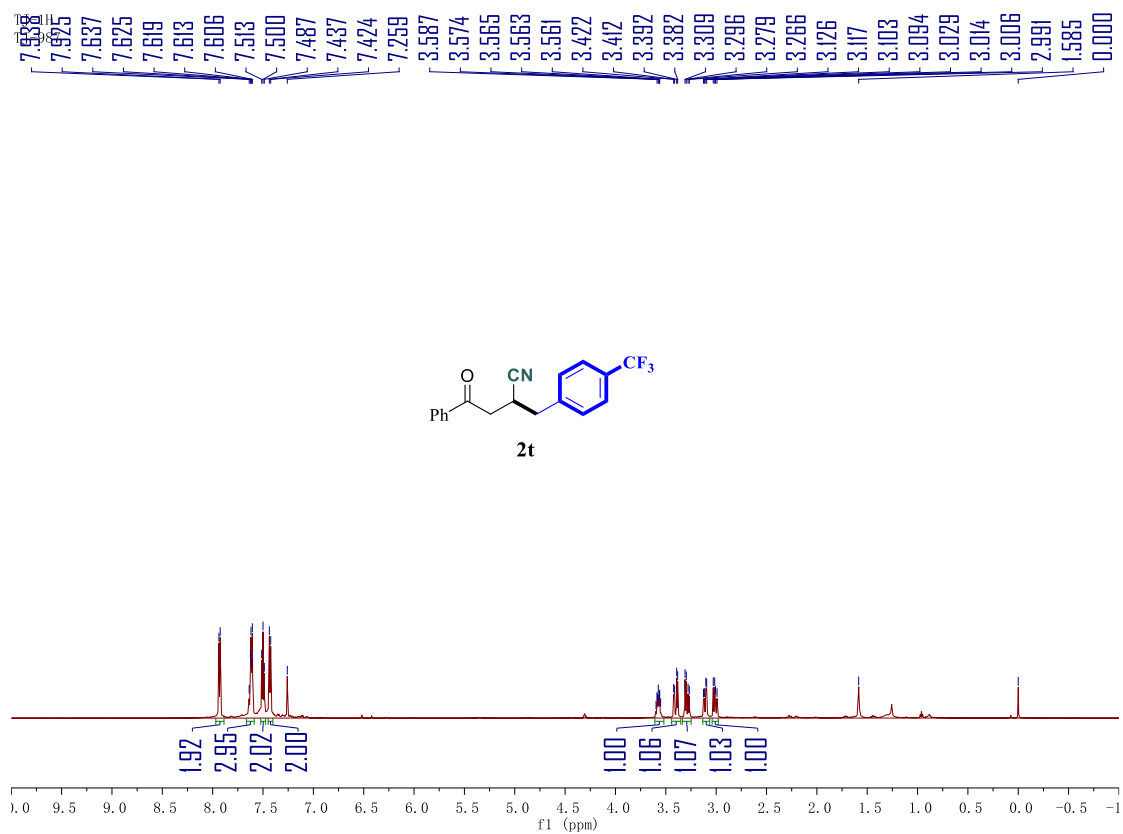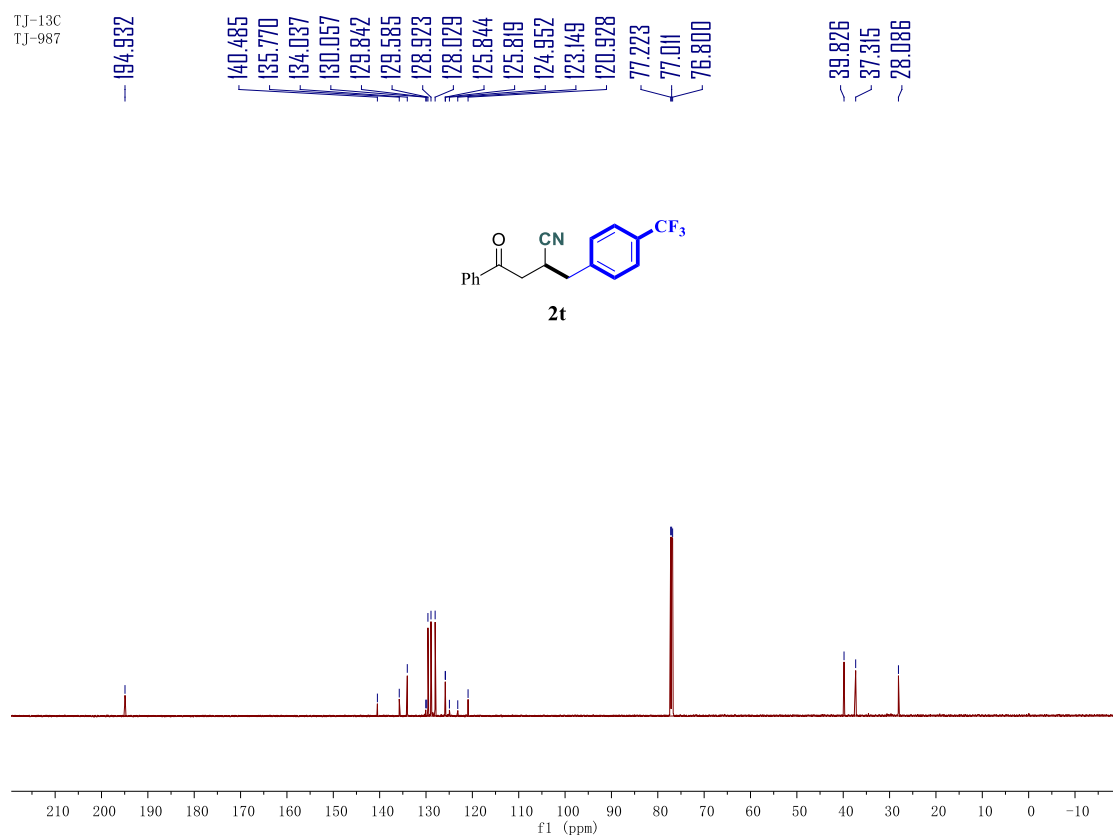

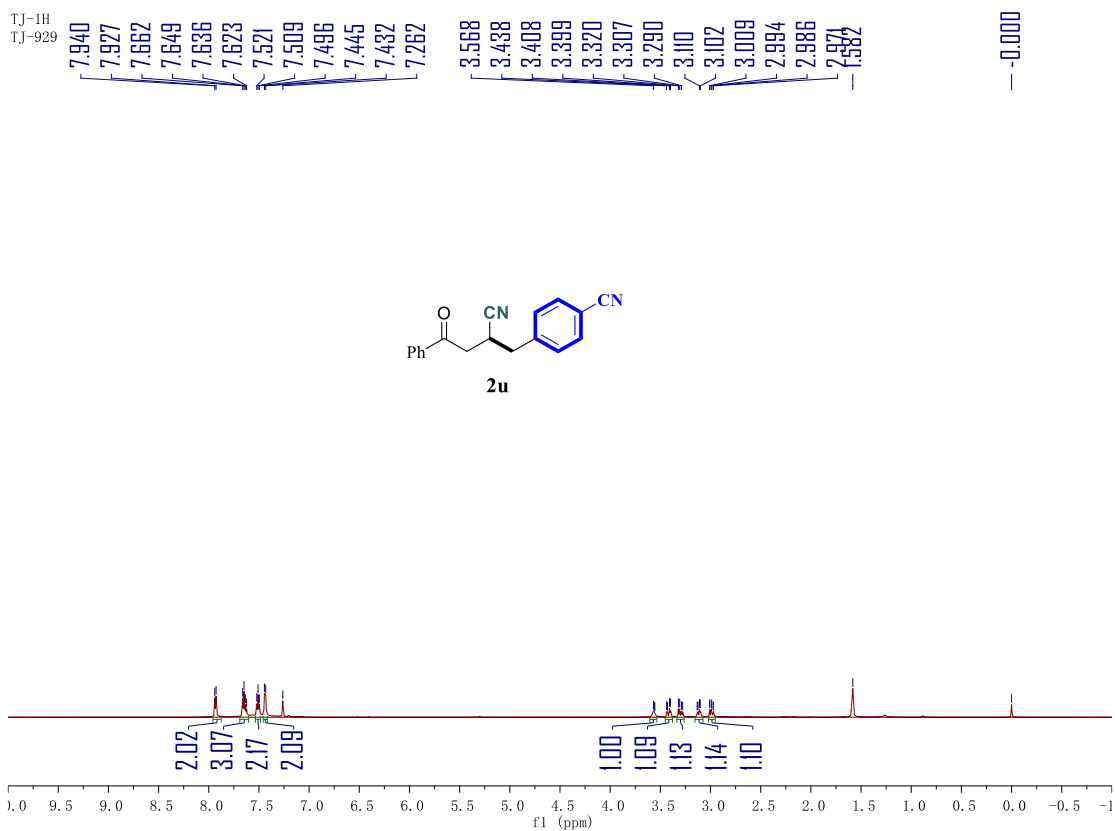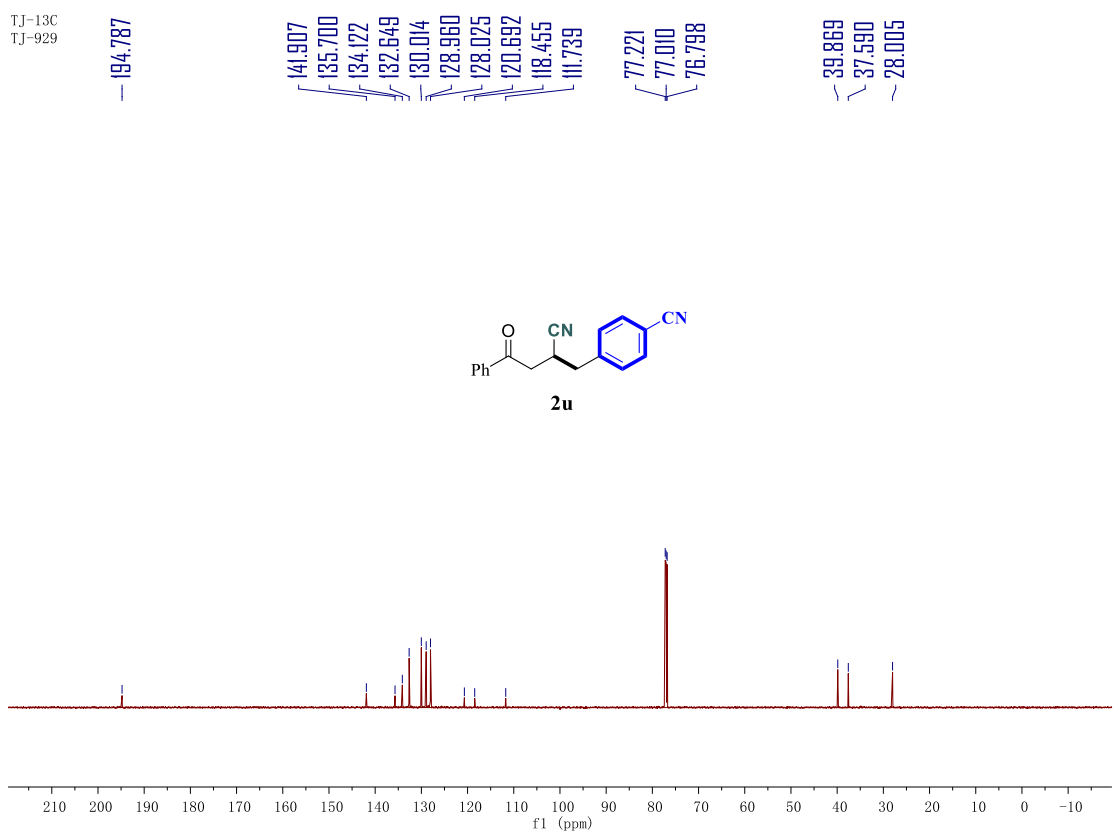

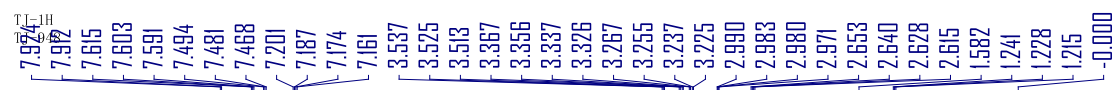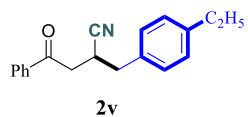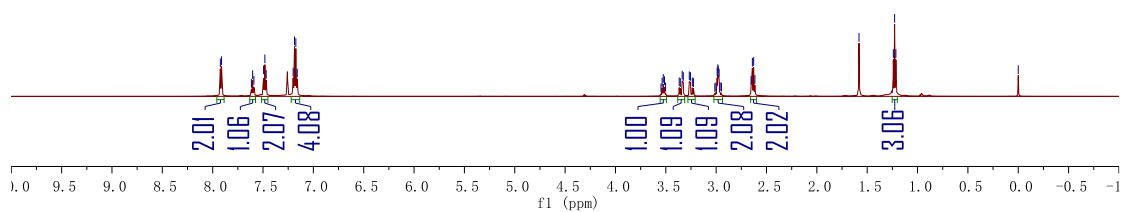

TJ-13C  
TJ-948

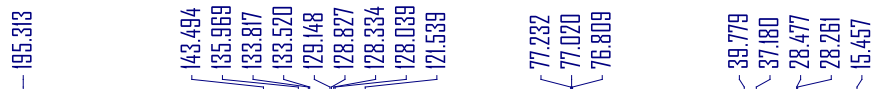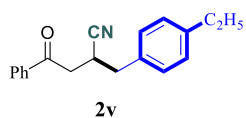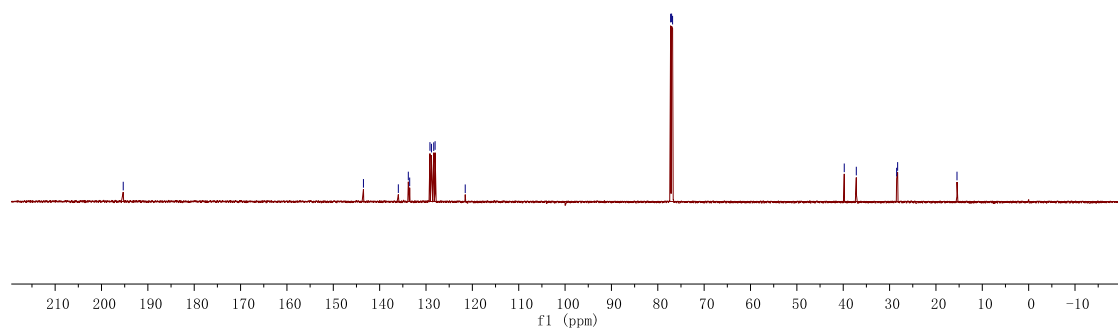

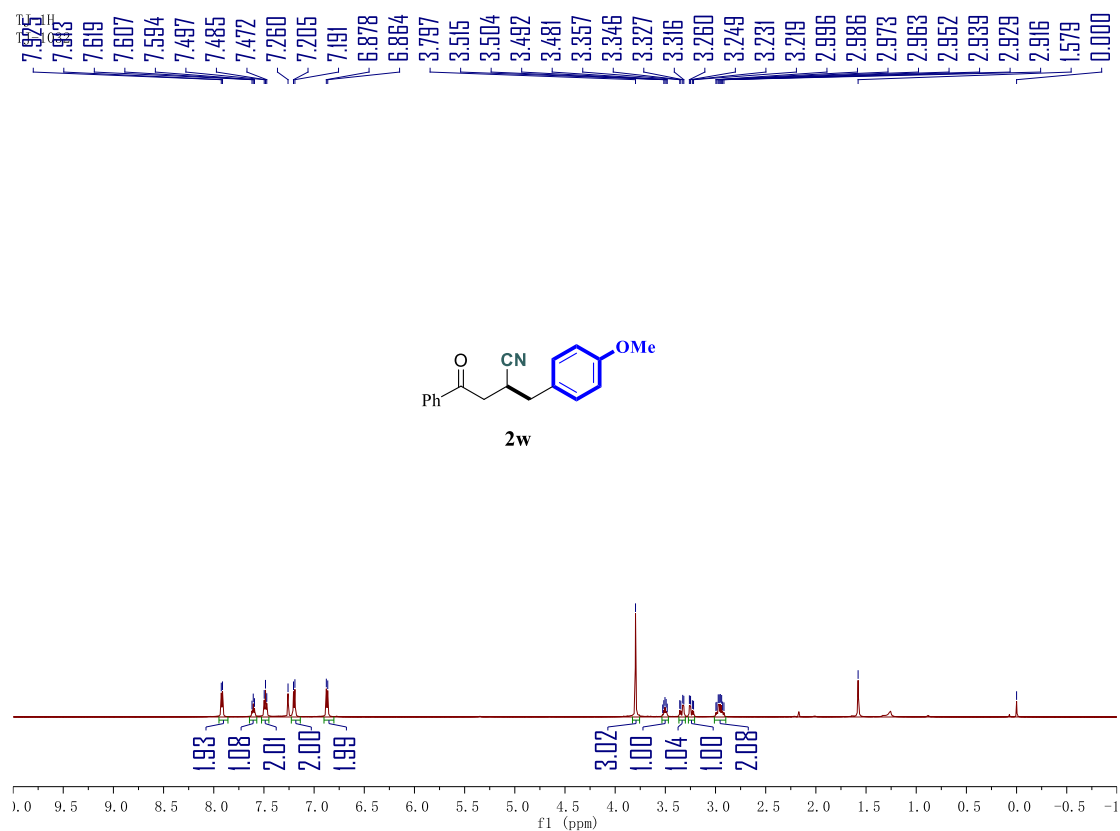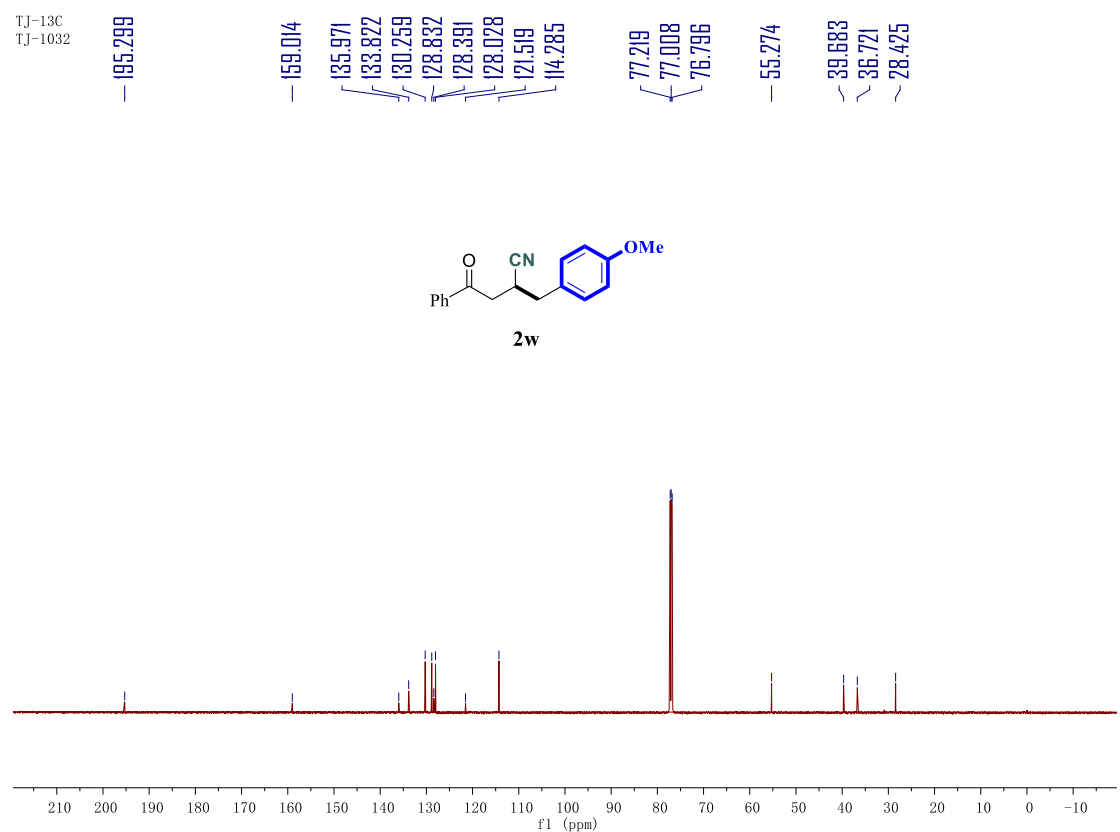

TJ-1H  
TJ-927

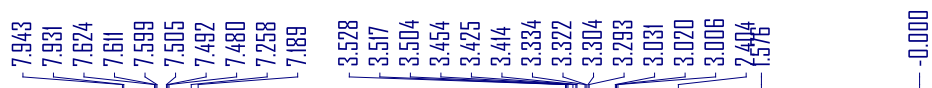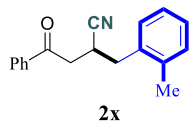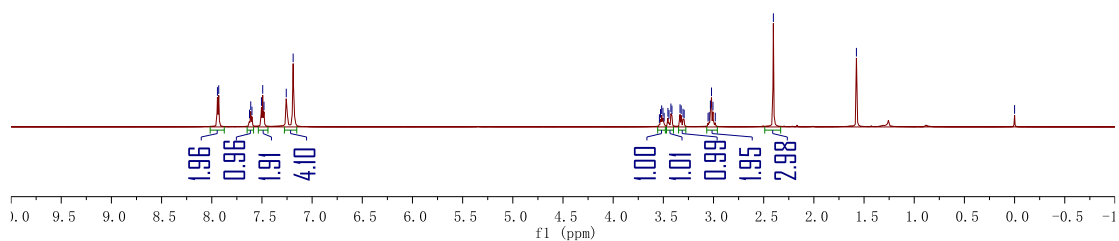

TJ-13C  
TJ-927

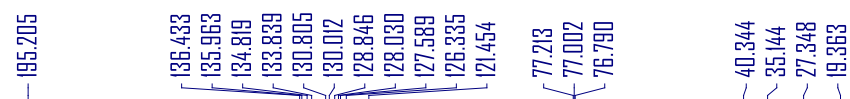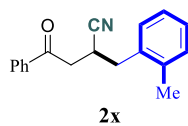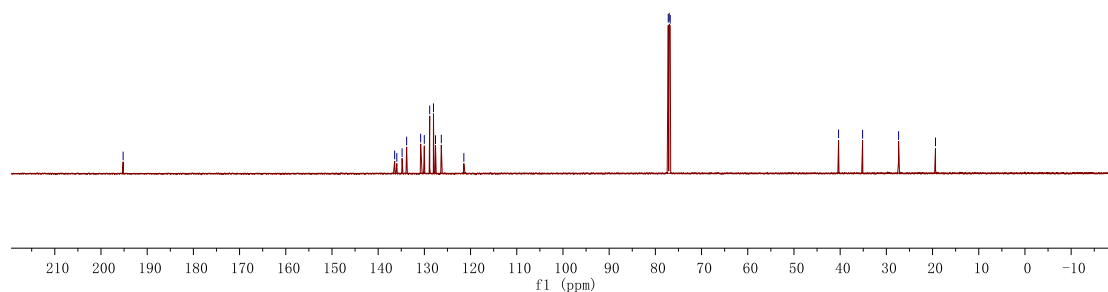

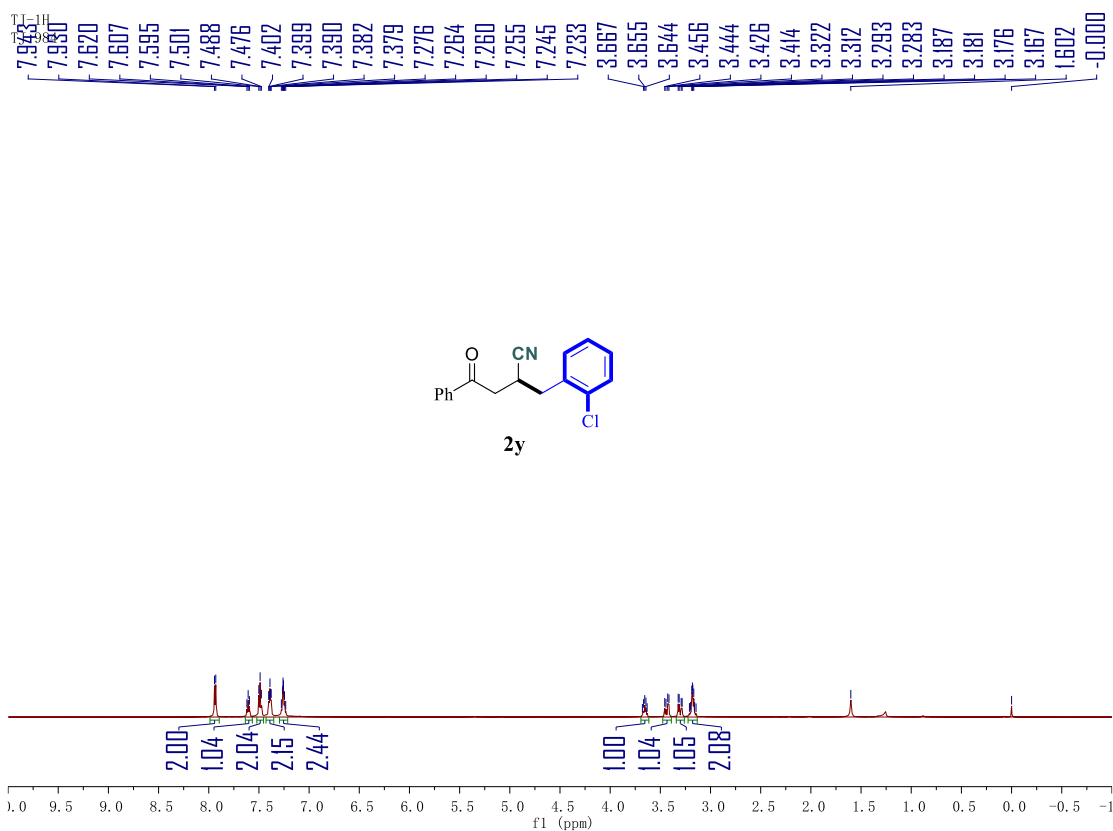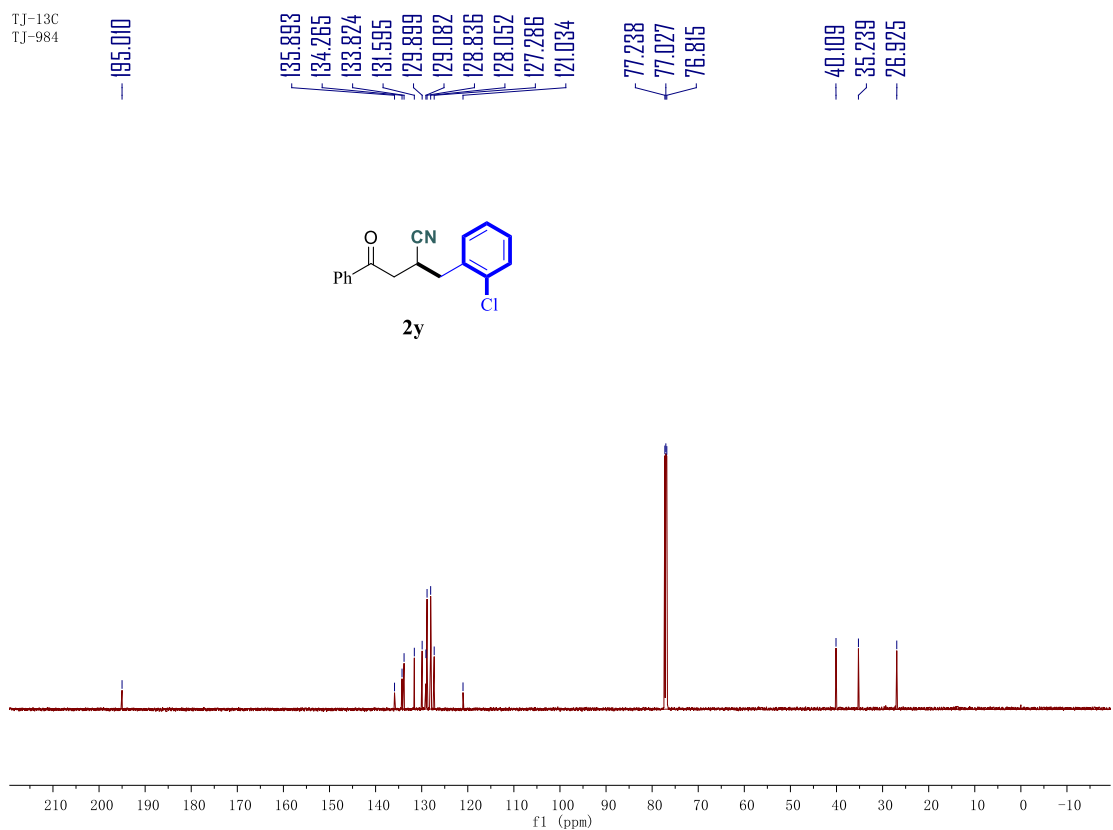

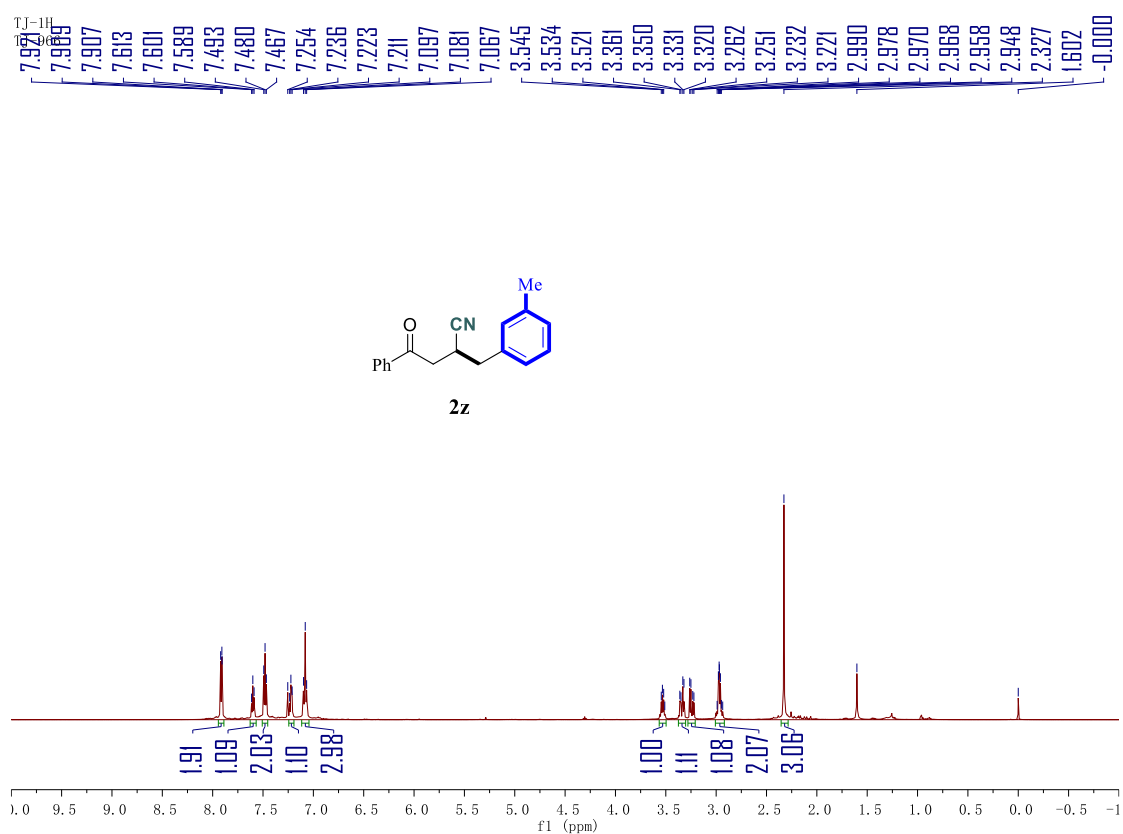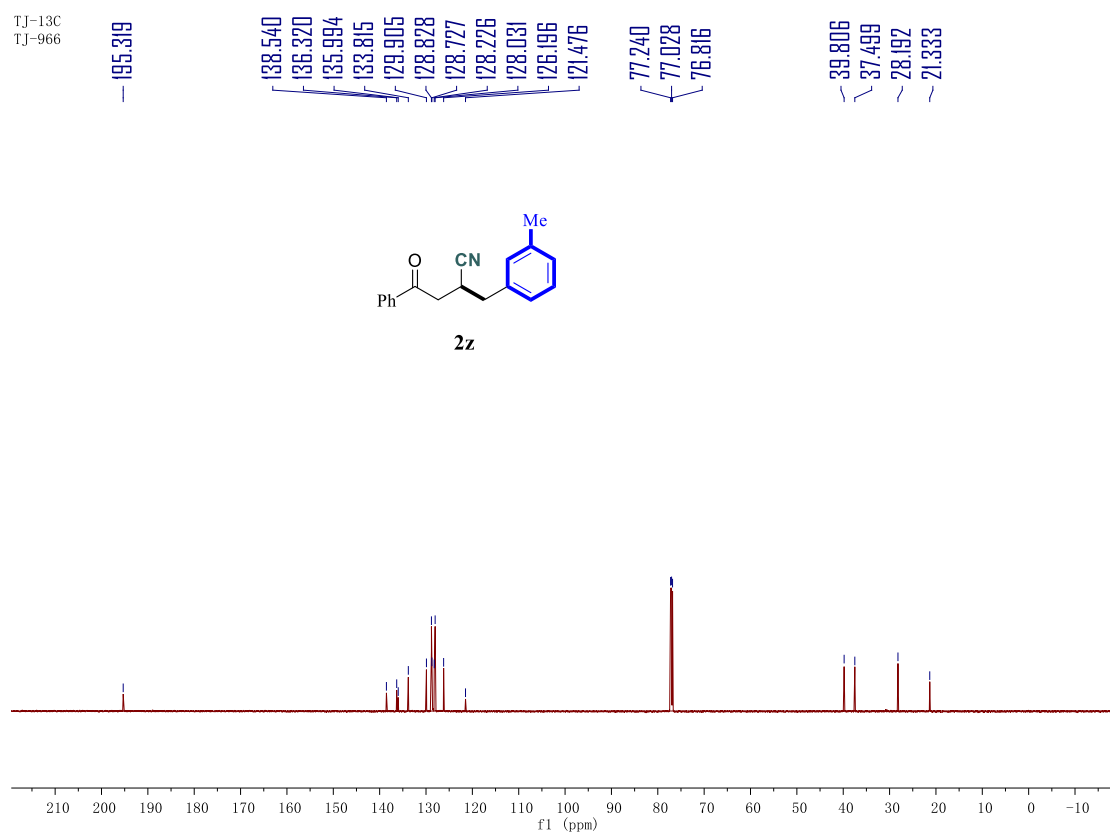

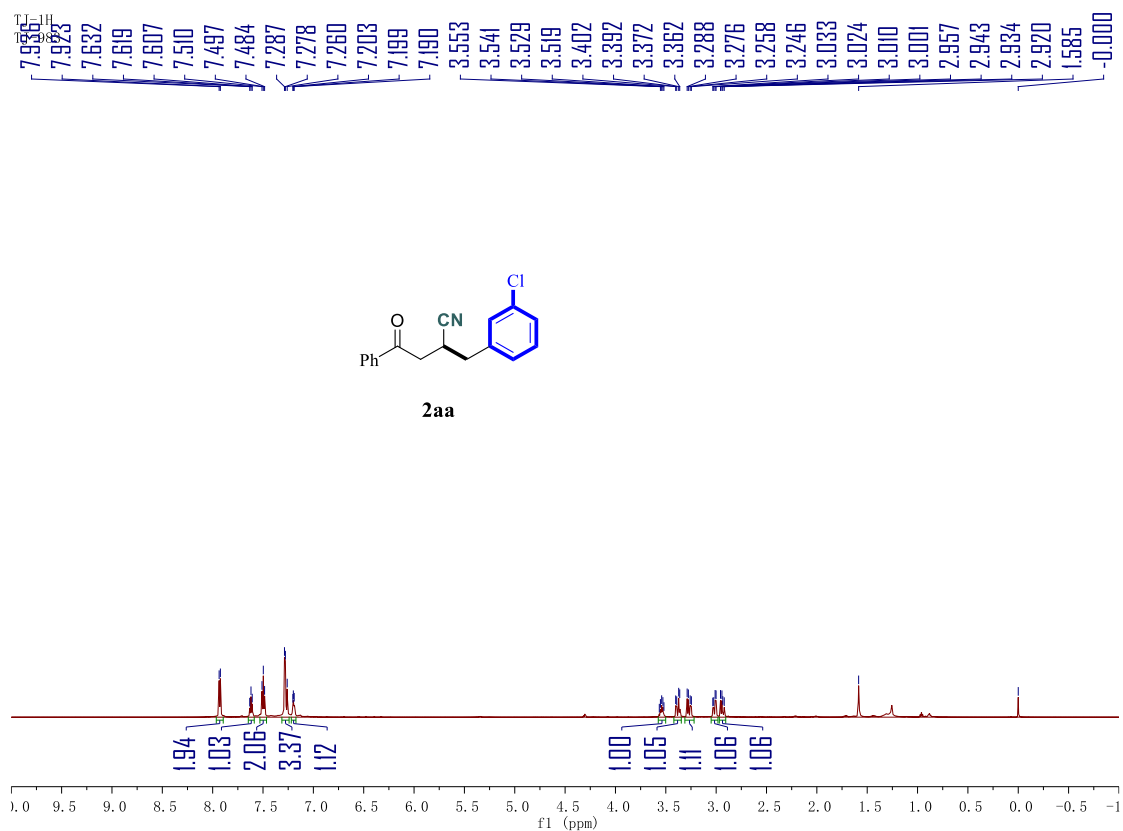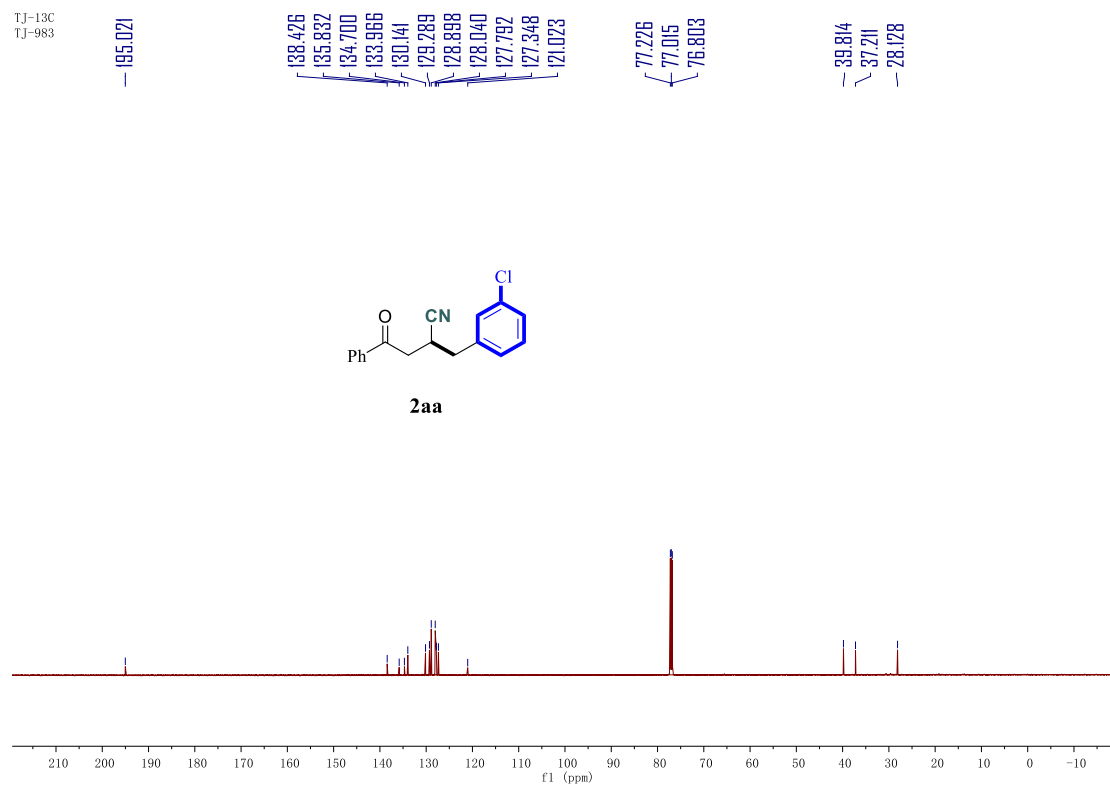



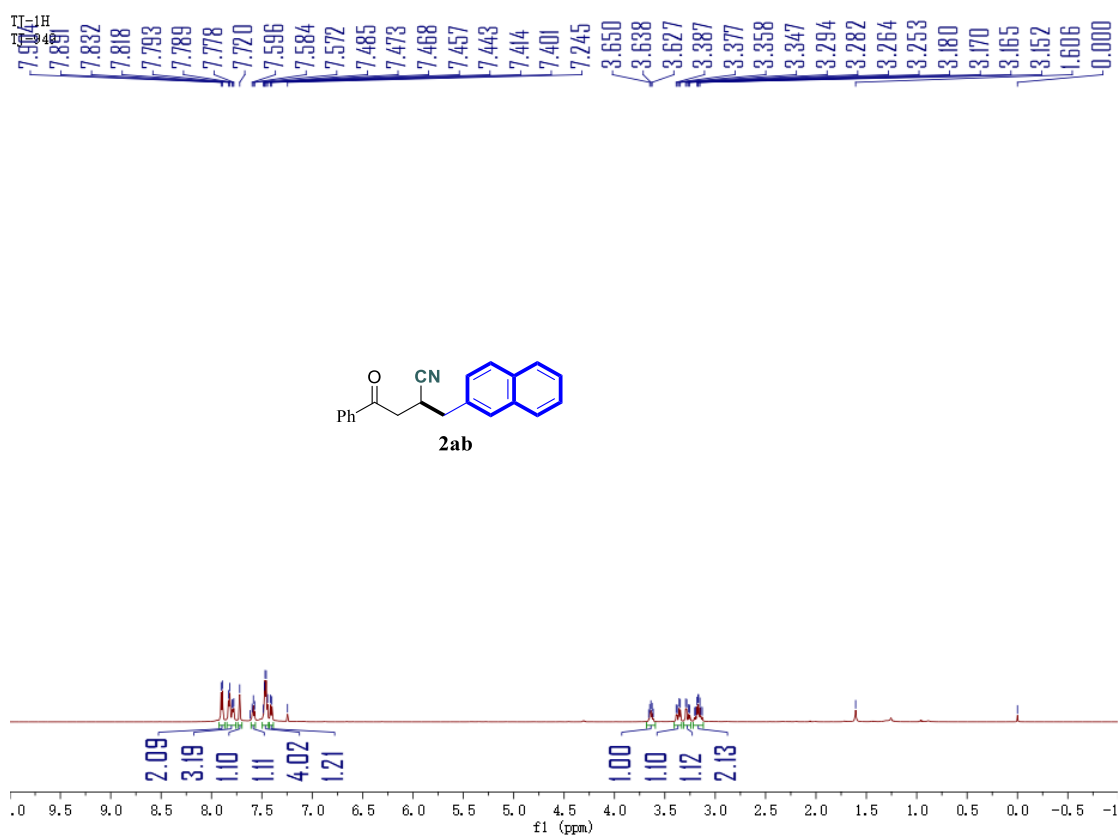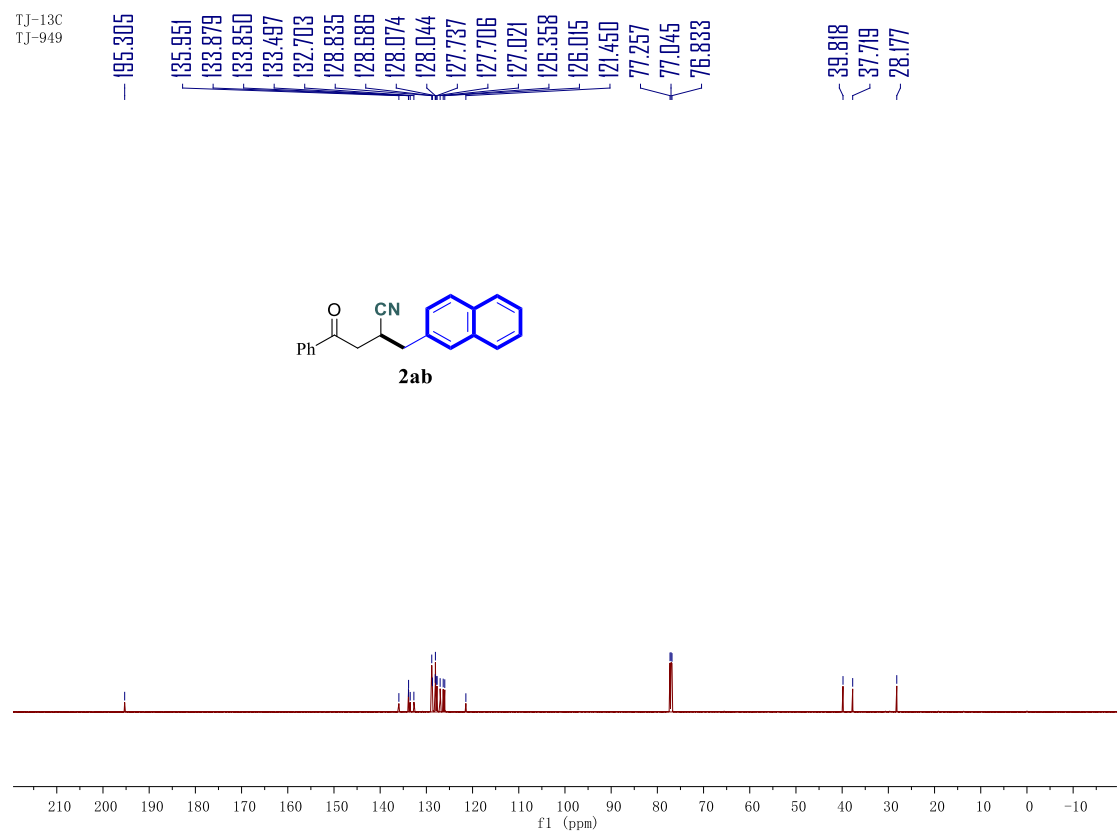

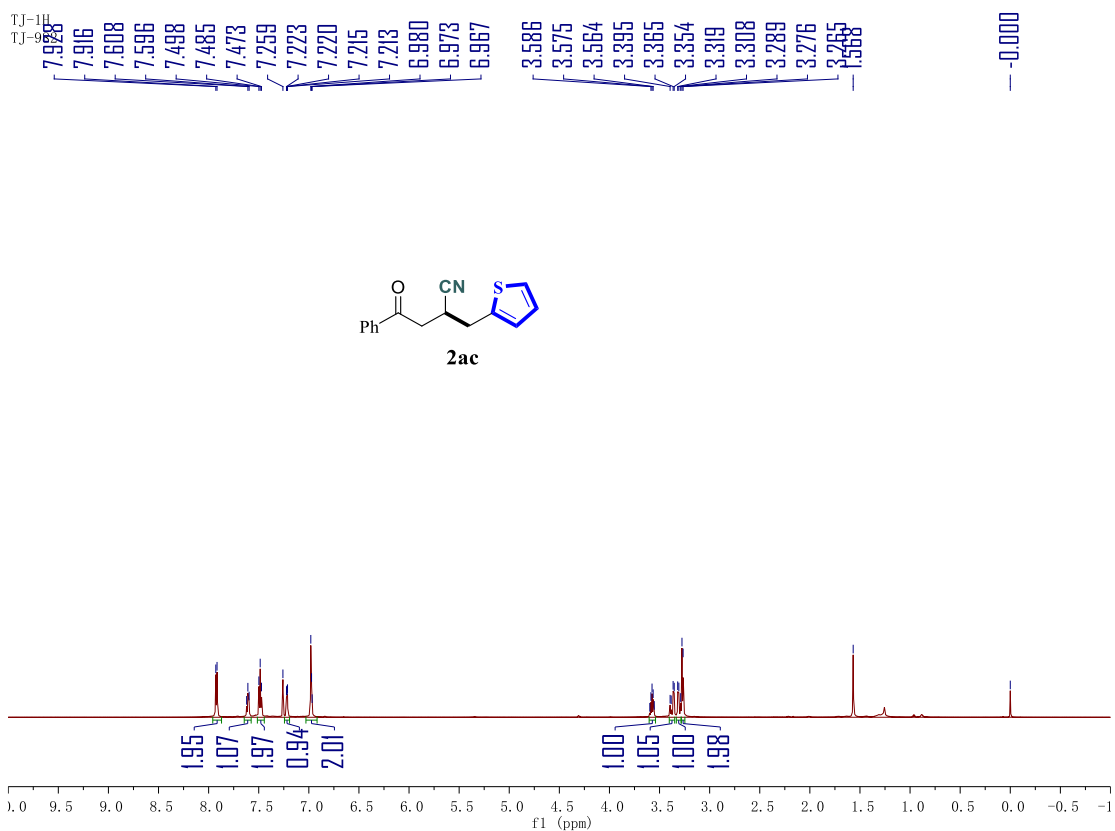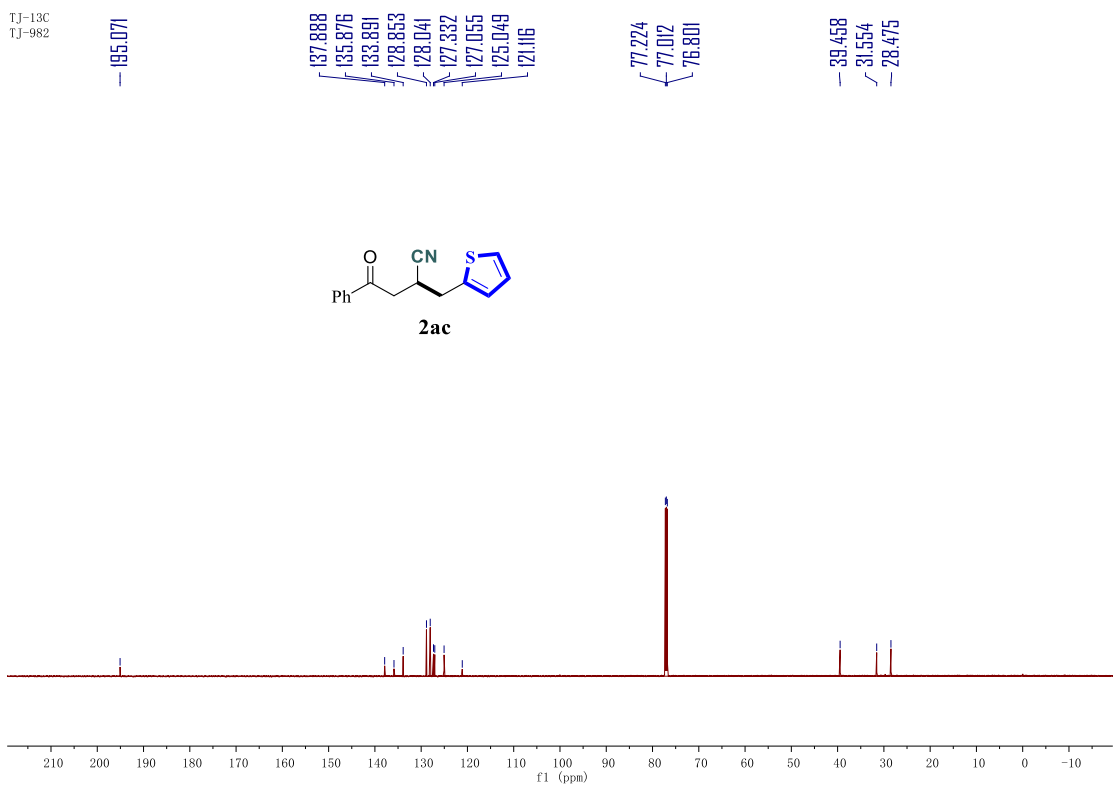

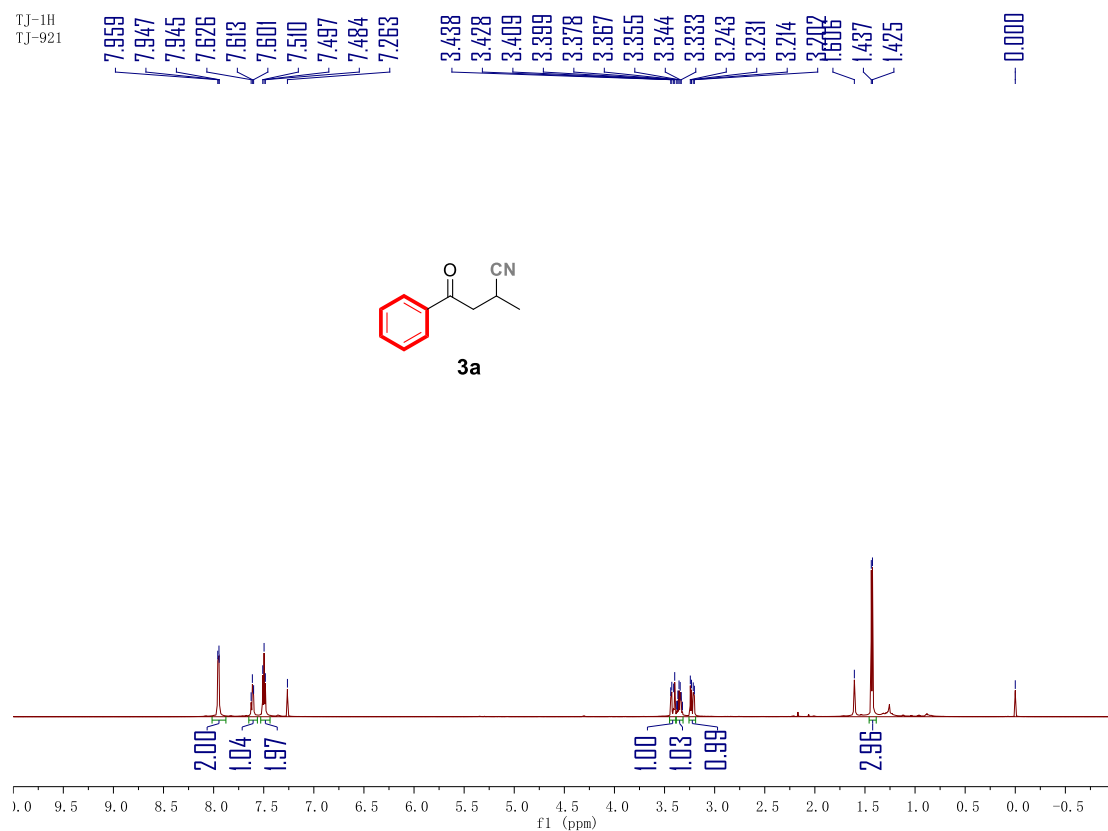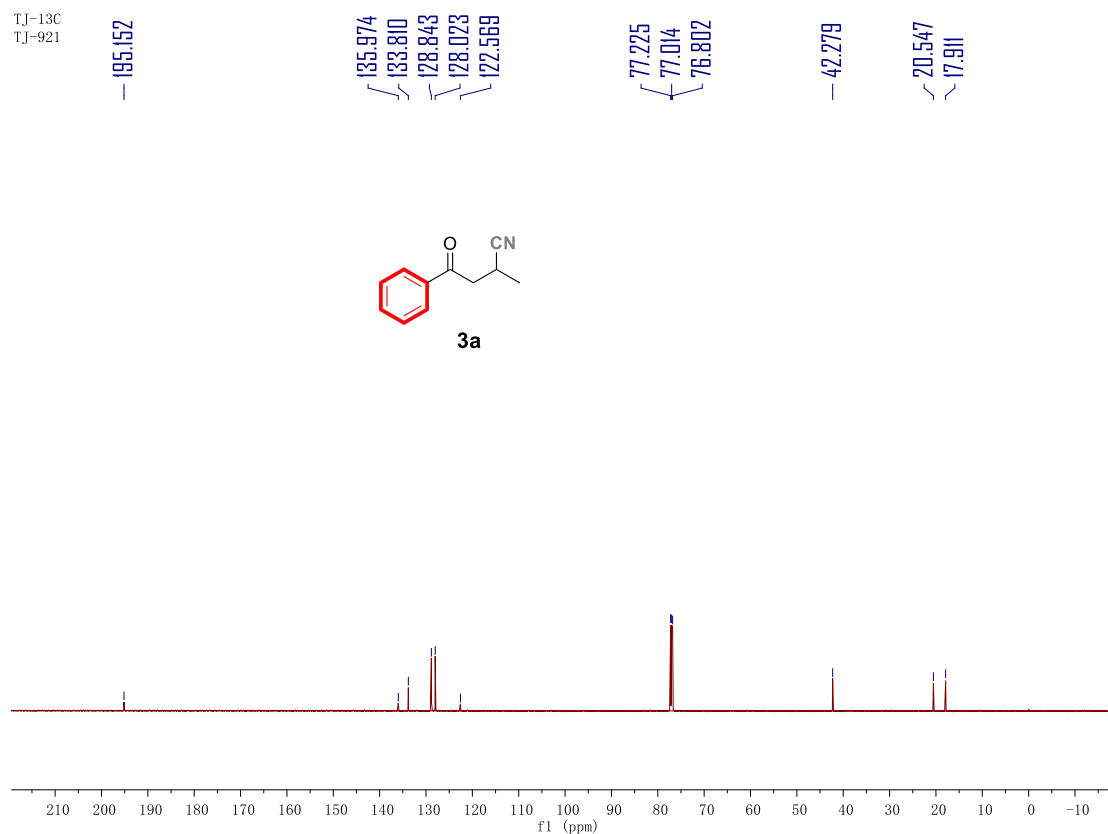

TJ-1H  
TJ-945

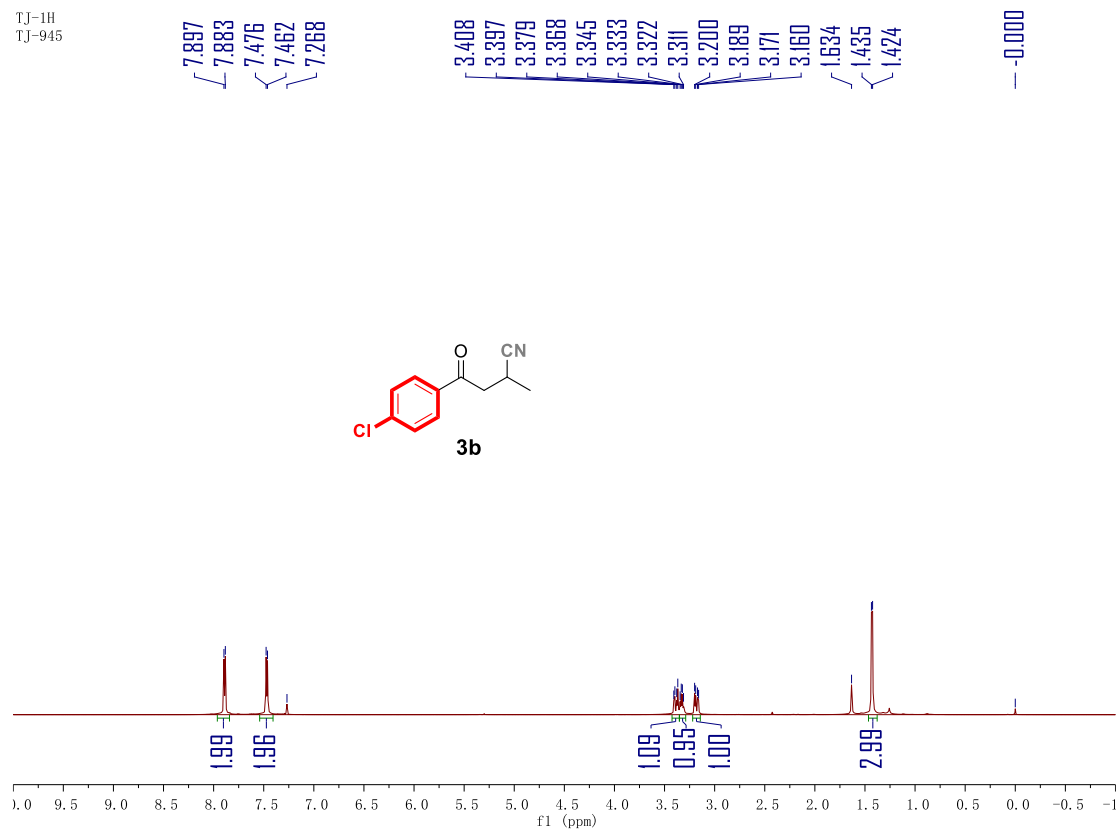

TJ-13C  
TJ-945

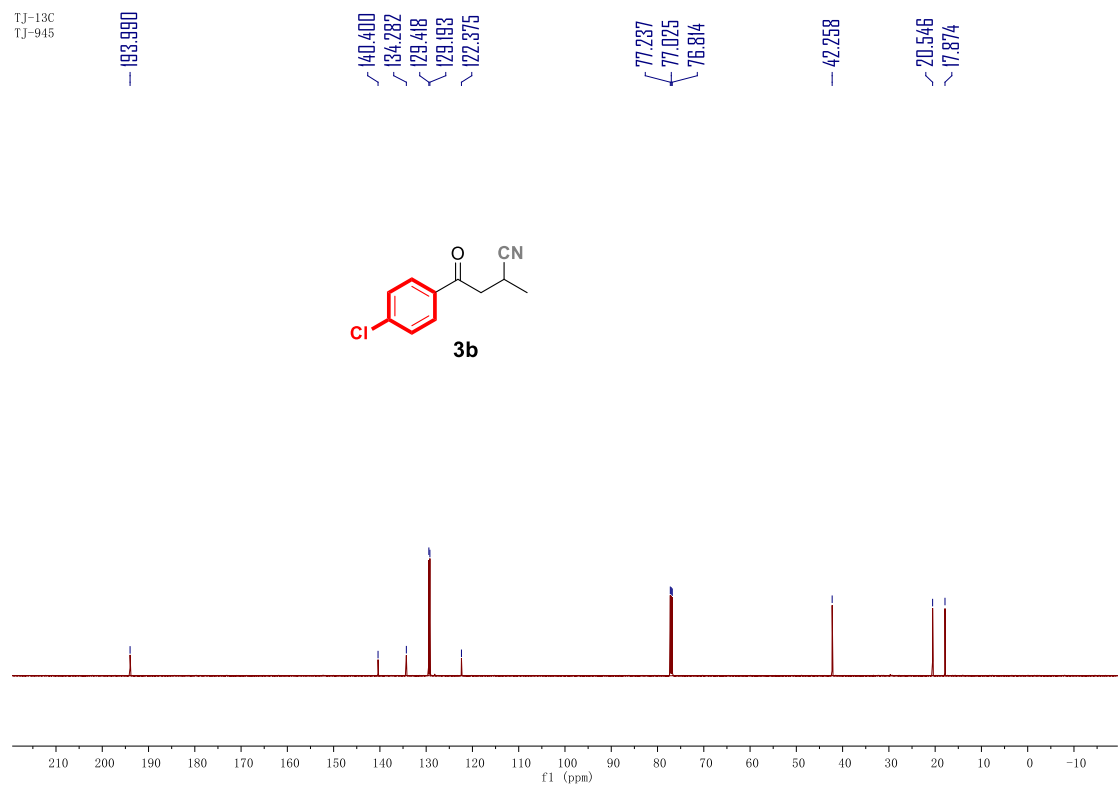

TJ-1H  
TJ-959

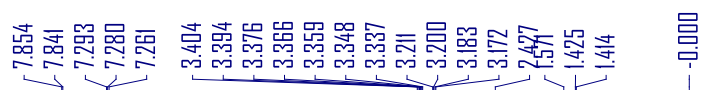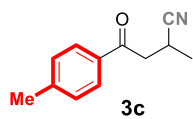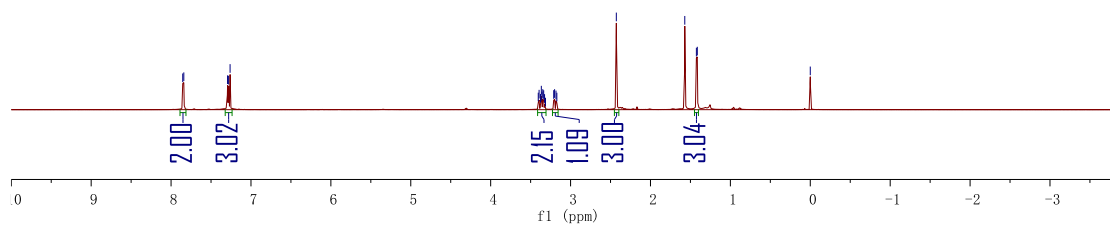

TJ-13C  
TJ-959

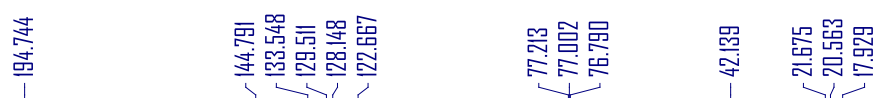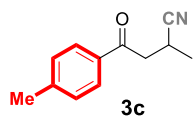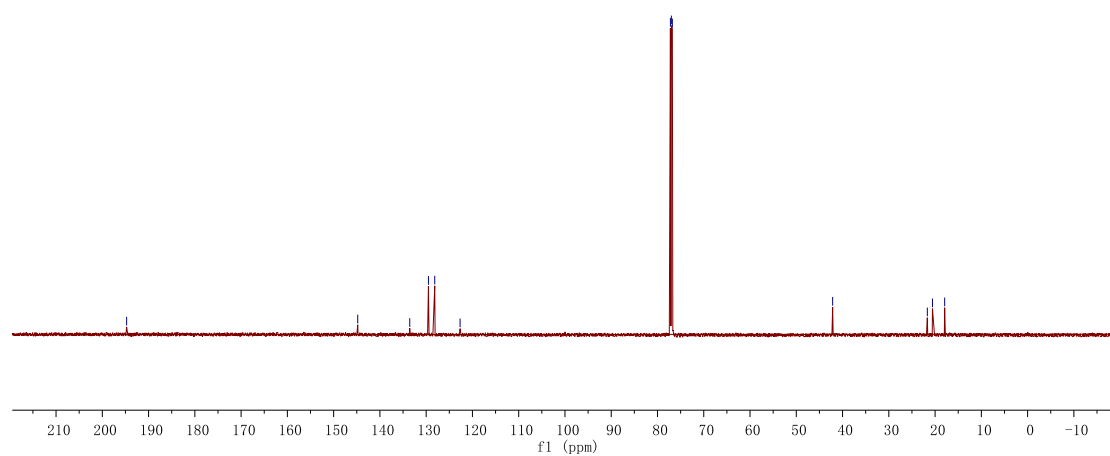

TJ-1H  
TJ-951

7.937  
7.923  
7.266  
6.984  
6.950

3.885  
3.378  
3.367  
3.343  
3.333  
3.322  
3.175  
3.158

1.623  
1.421  
1.410

-0.000

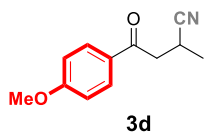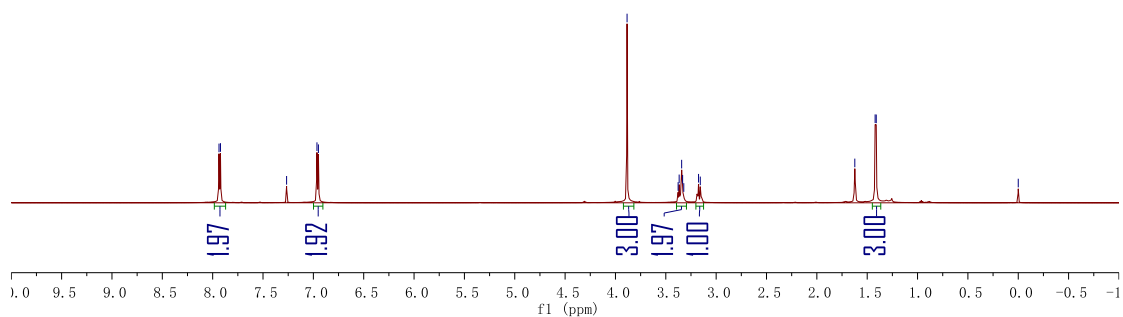

TJ-13C  
TJ-951

193.597

164.075

130.352  
129.103  
122.734  
114.008

77.226  
77.015  
76.803

55.535

41.885

20.625  
17.941

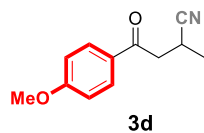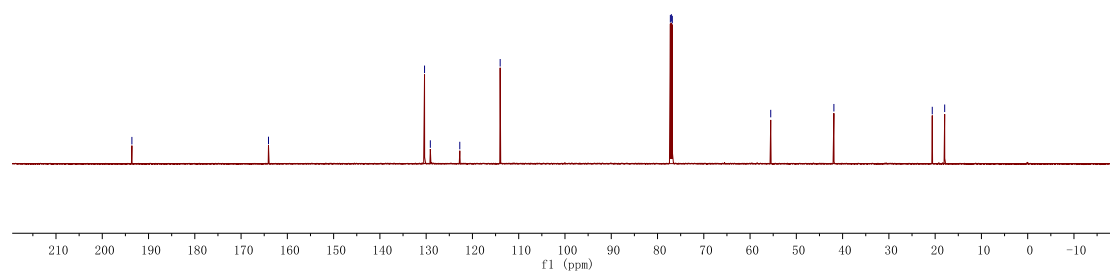

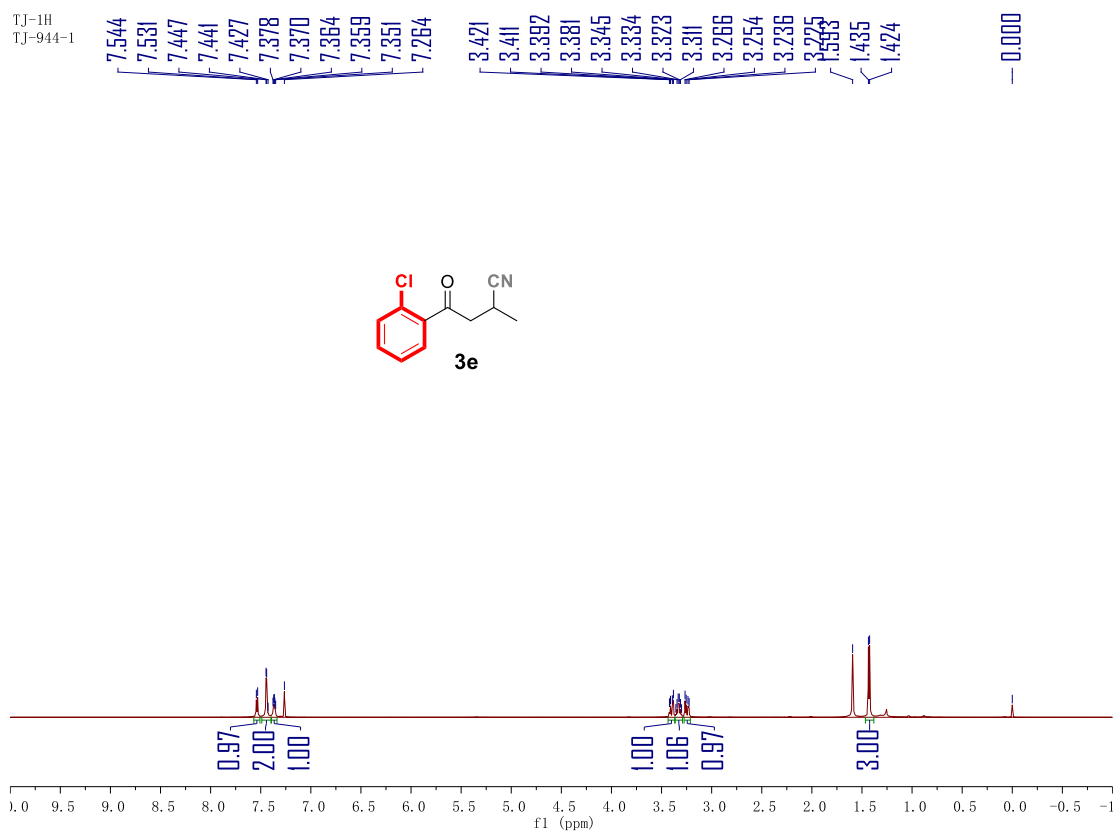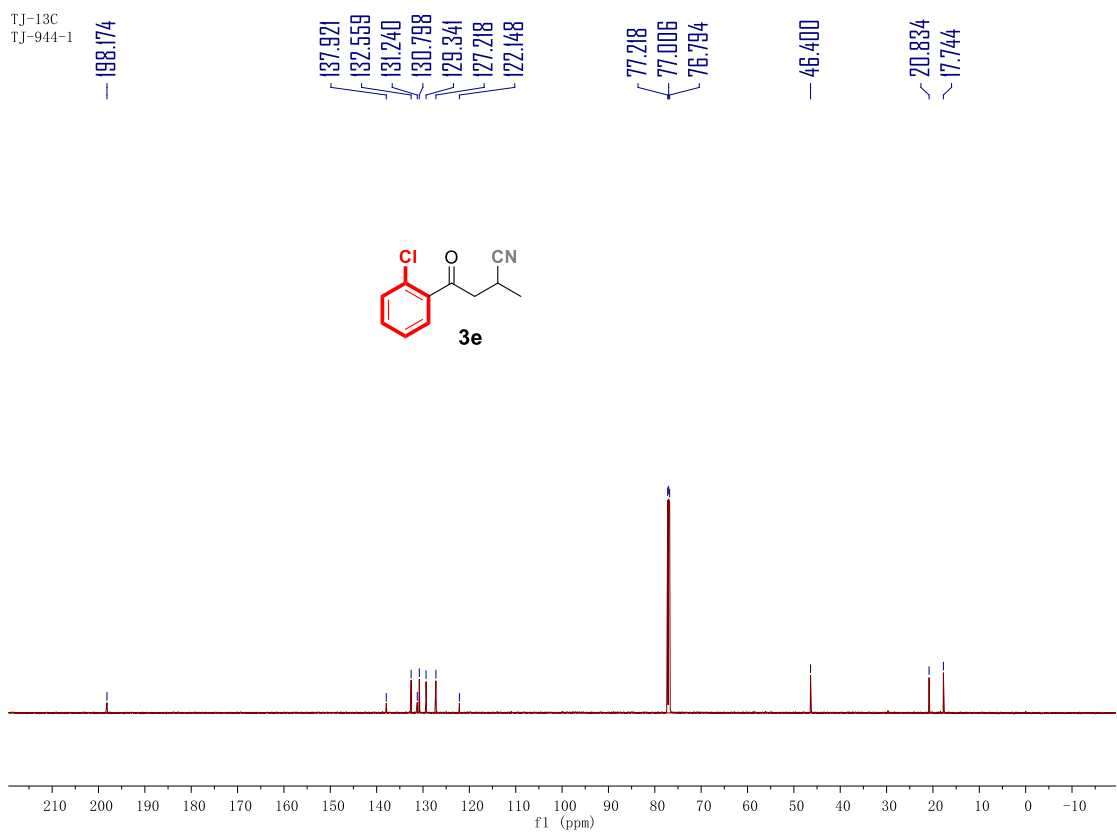

TJ-1H  
TJ-943

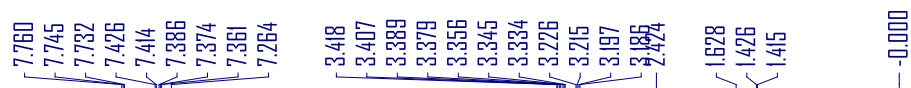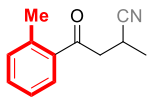

3f

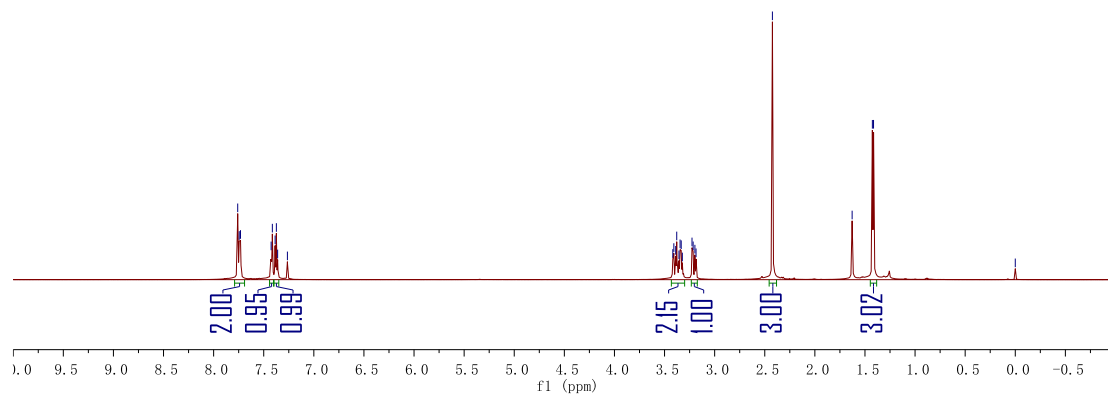

TJ-13C  
TJ-943

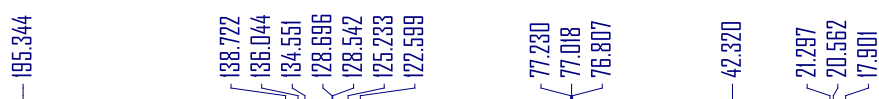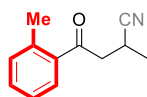

3f

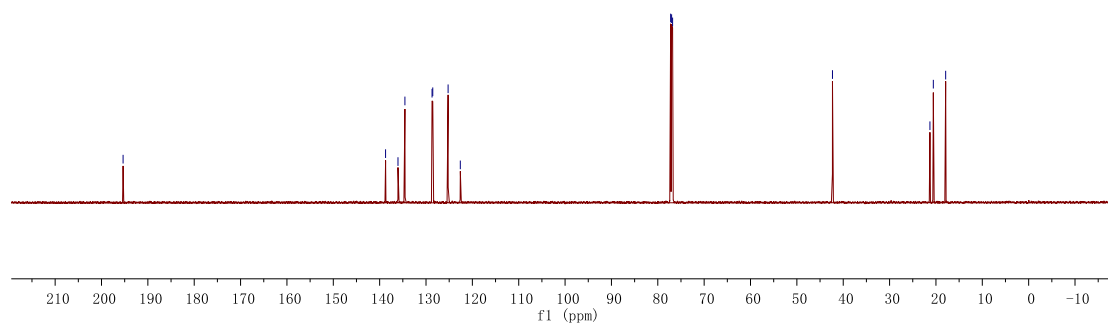



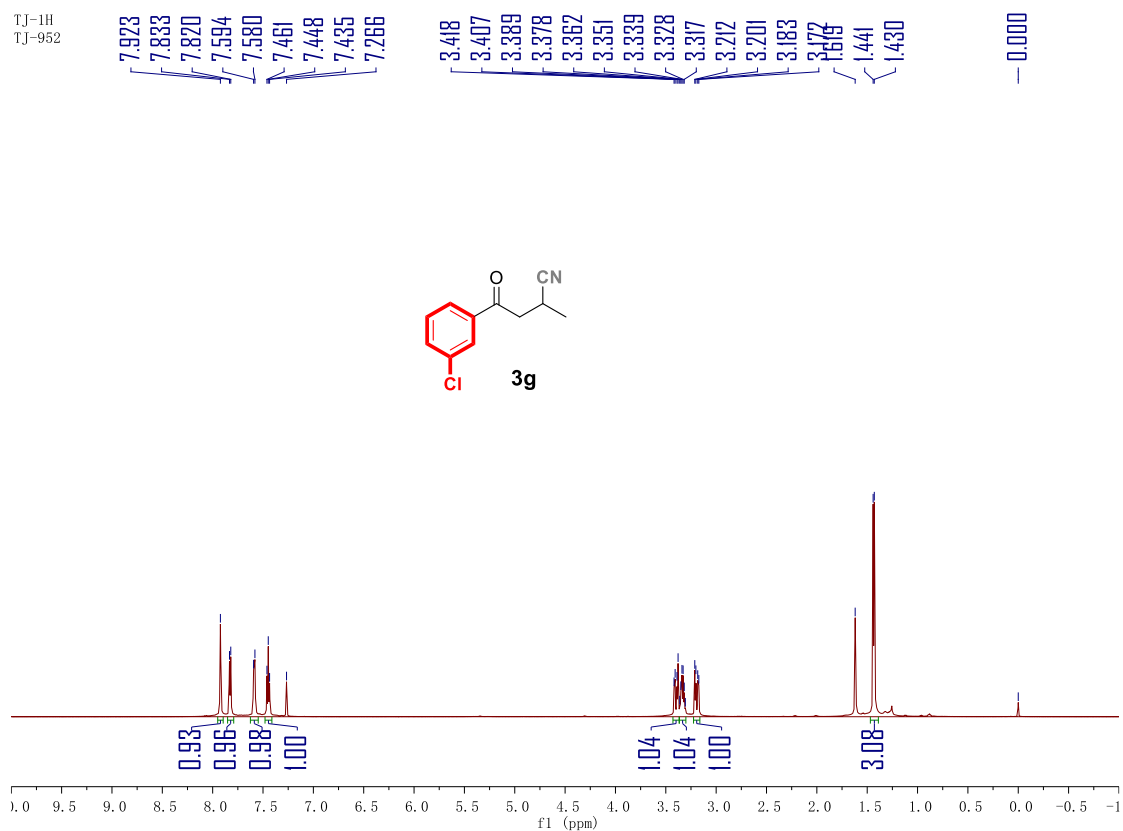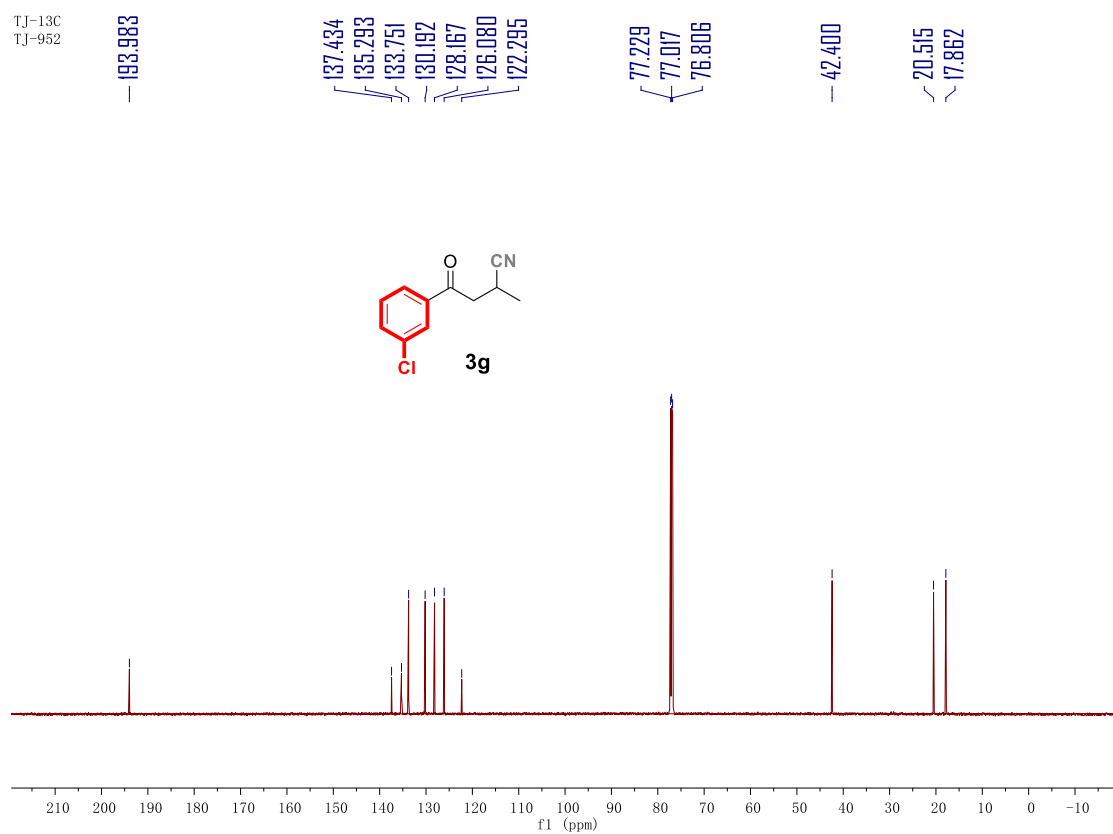

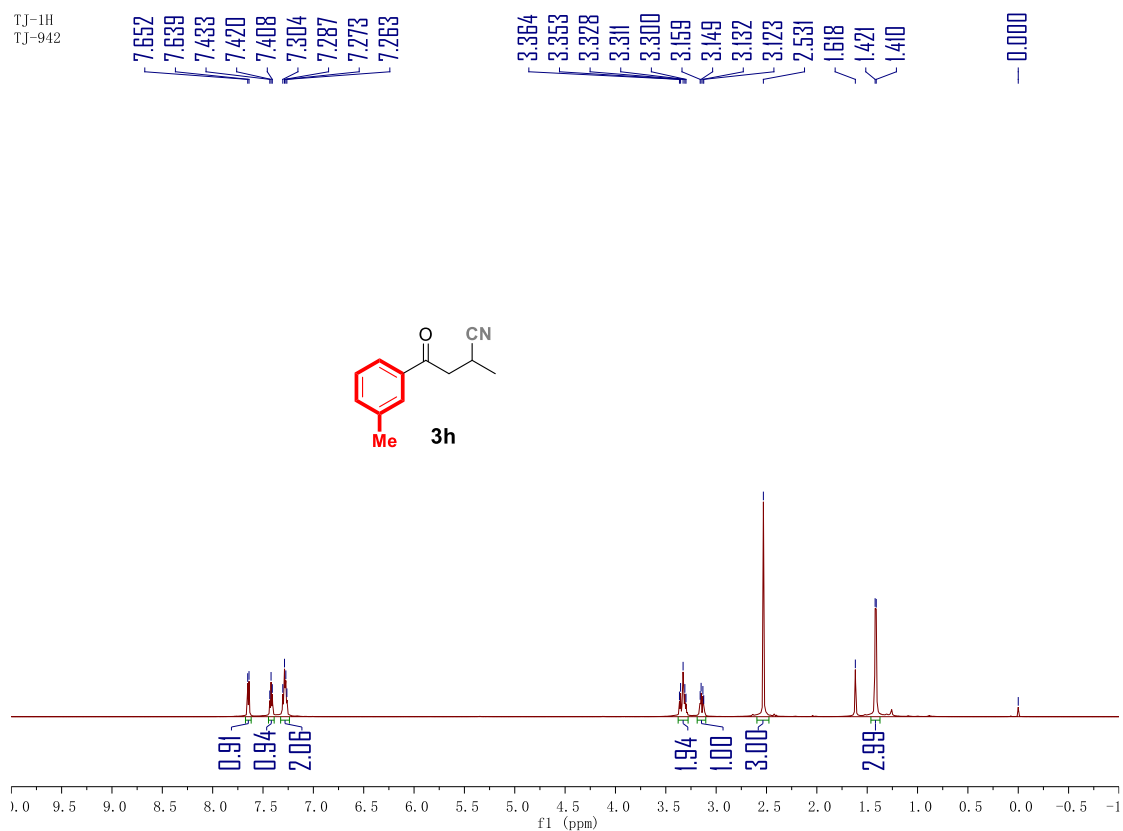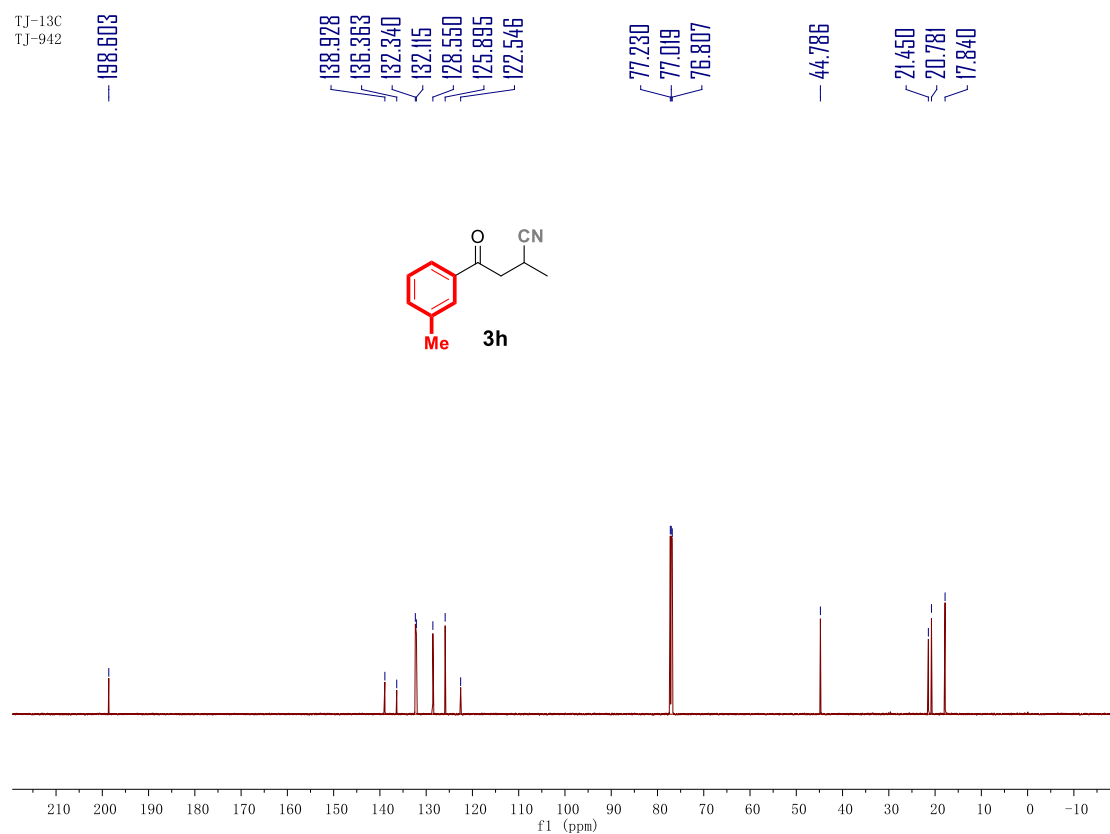

TJ-1H  
TJ-950

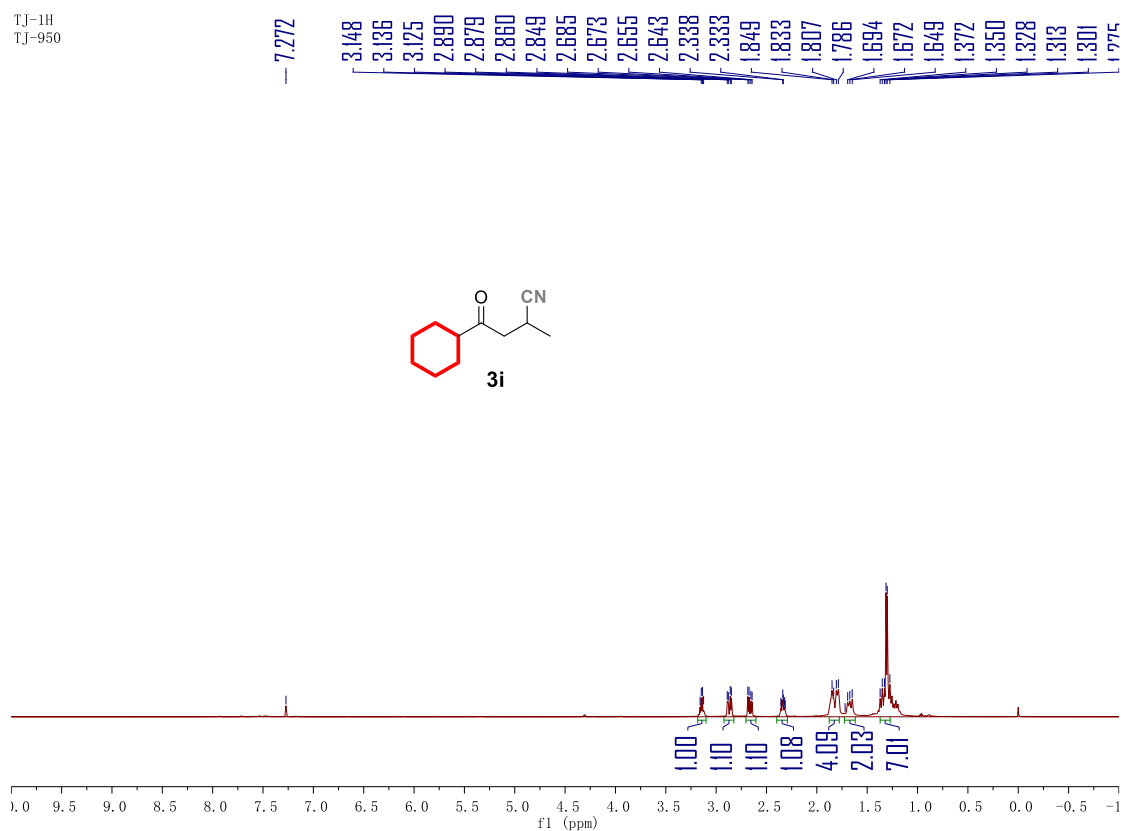

TJ-13C  
TJ-950

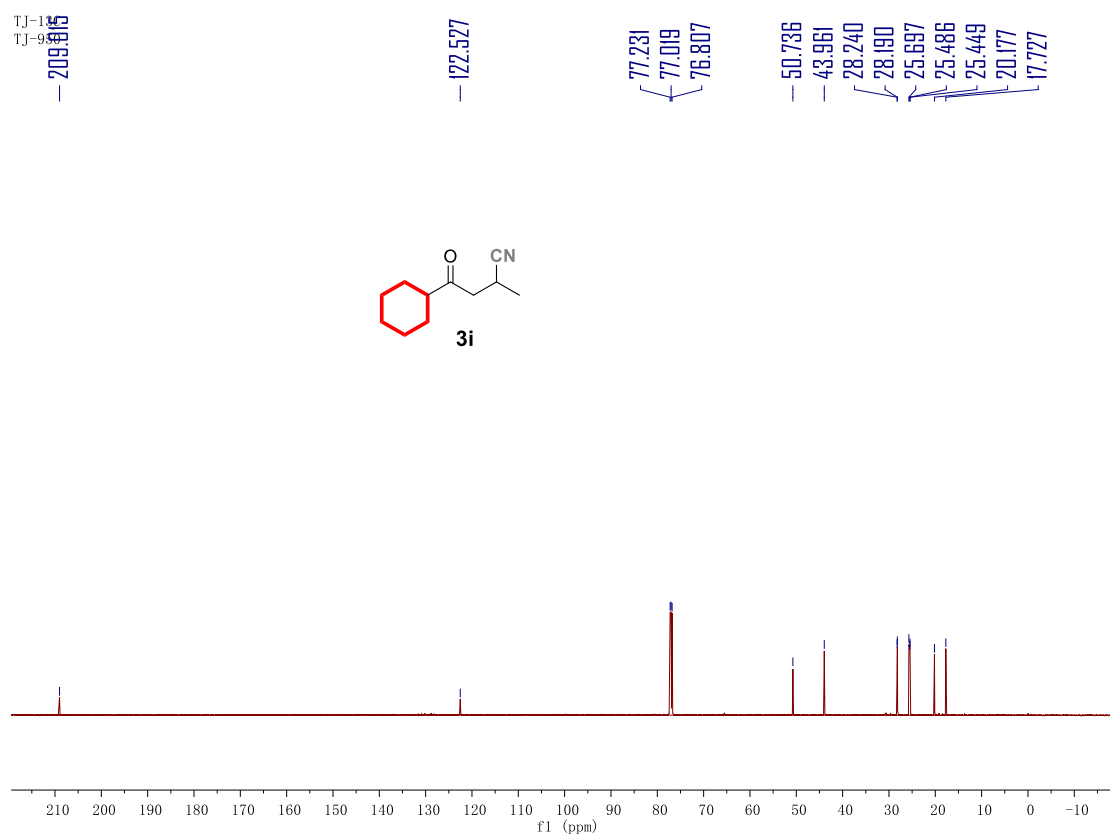

TJ-1H  
TJ-994

7.366 7.354 7.341 7.310 7.298 7.286 7.260 7.206 7.194 3.714 3.107 3.095 3.084 3.072 2.870 2.860 2.840 2.829 2.671 2.659 2.640 2.628 1.591 1.255 1.243 -0.000

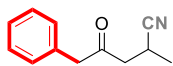

3j

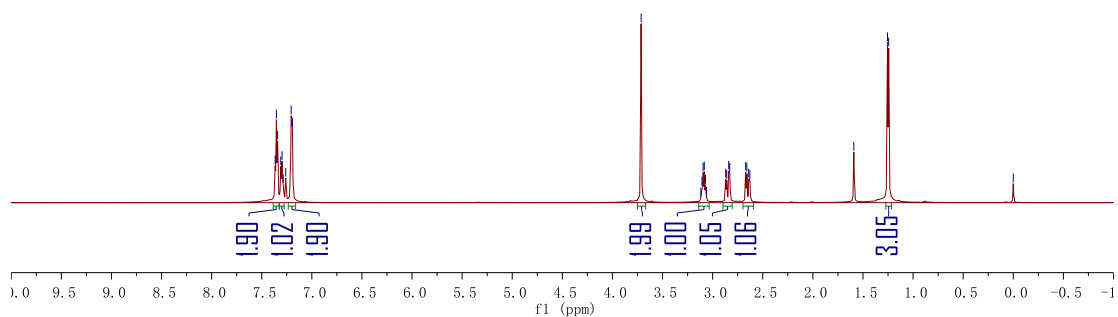

TJ-13C  
TJ-994

203.528

133.157 129.343 129.018 127.490 122.230

77.239 77.027 76.815

50.190 44.963

20.201 17.562

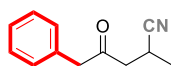

3j

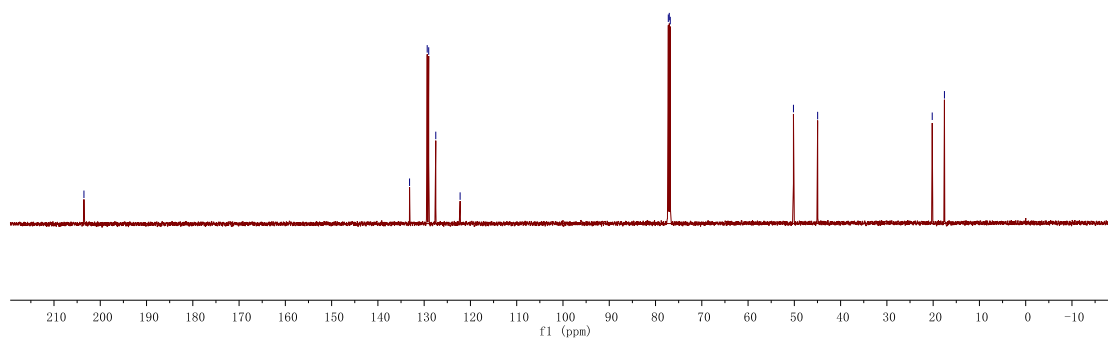

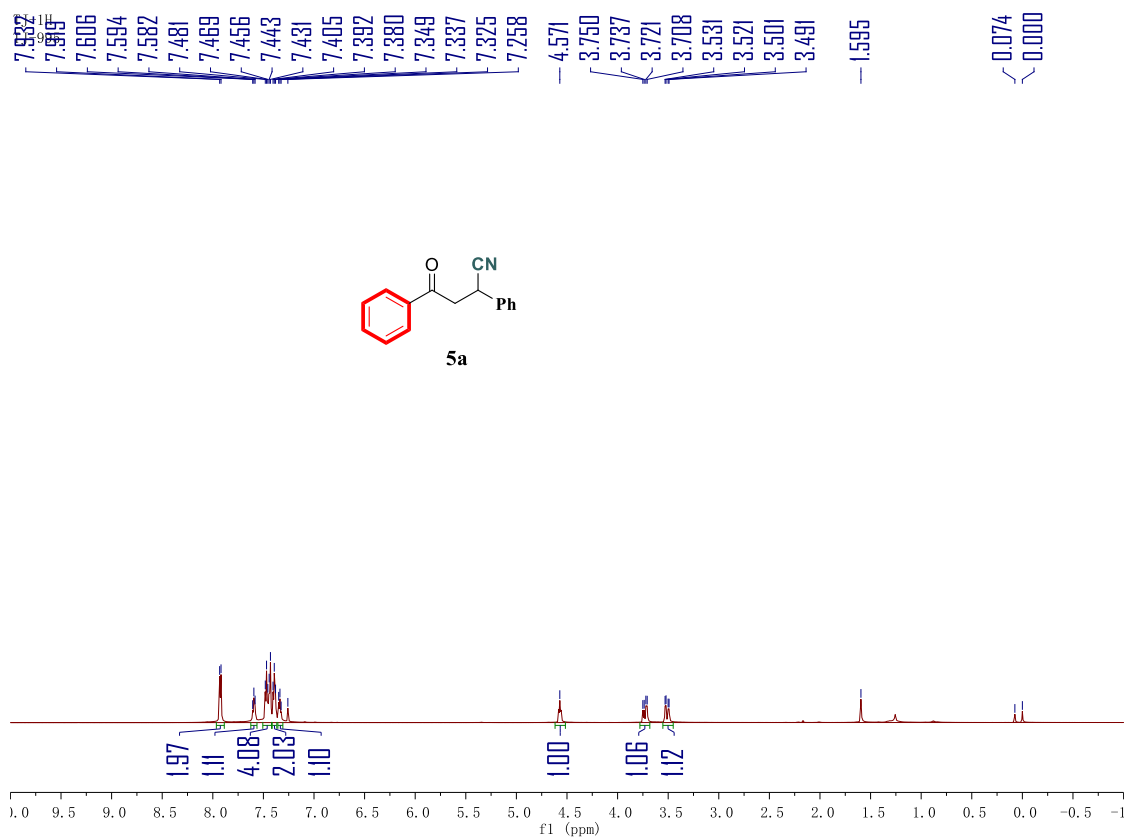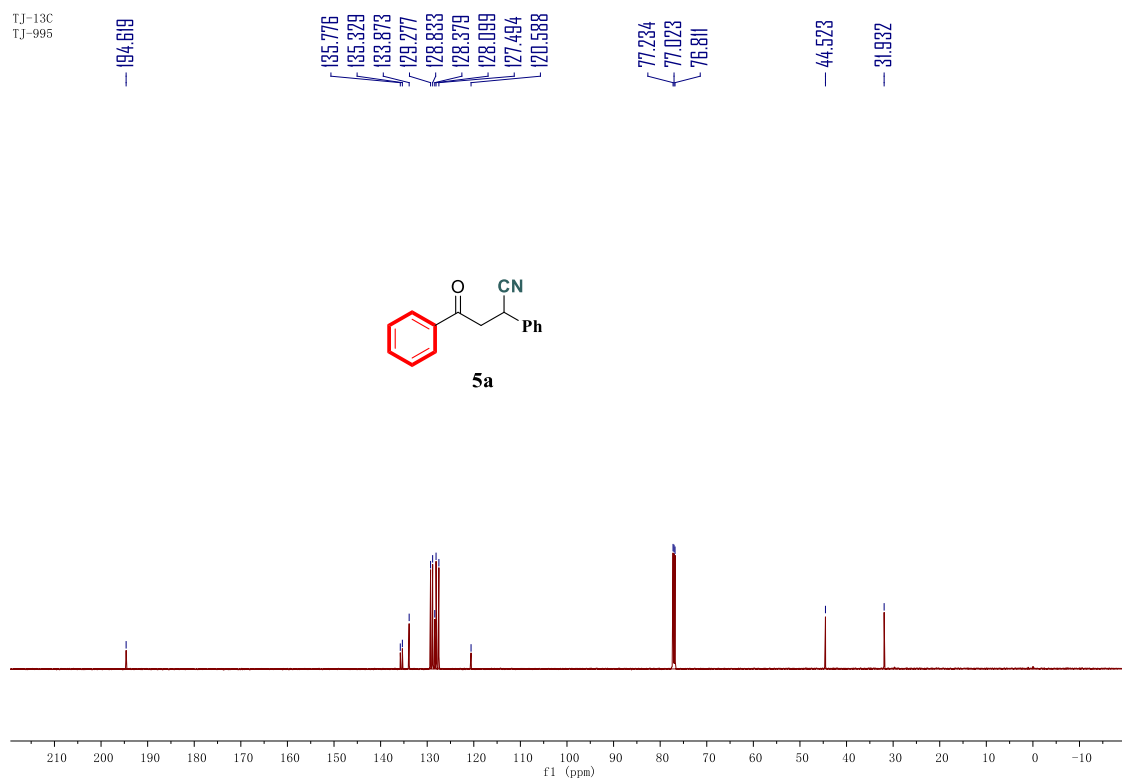

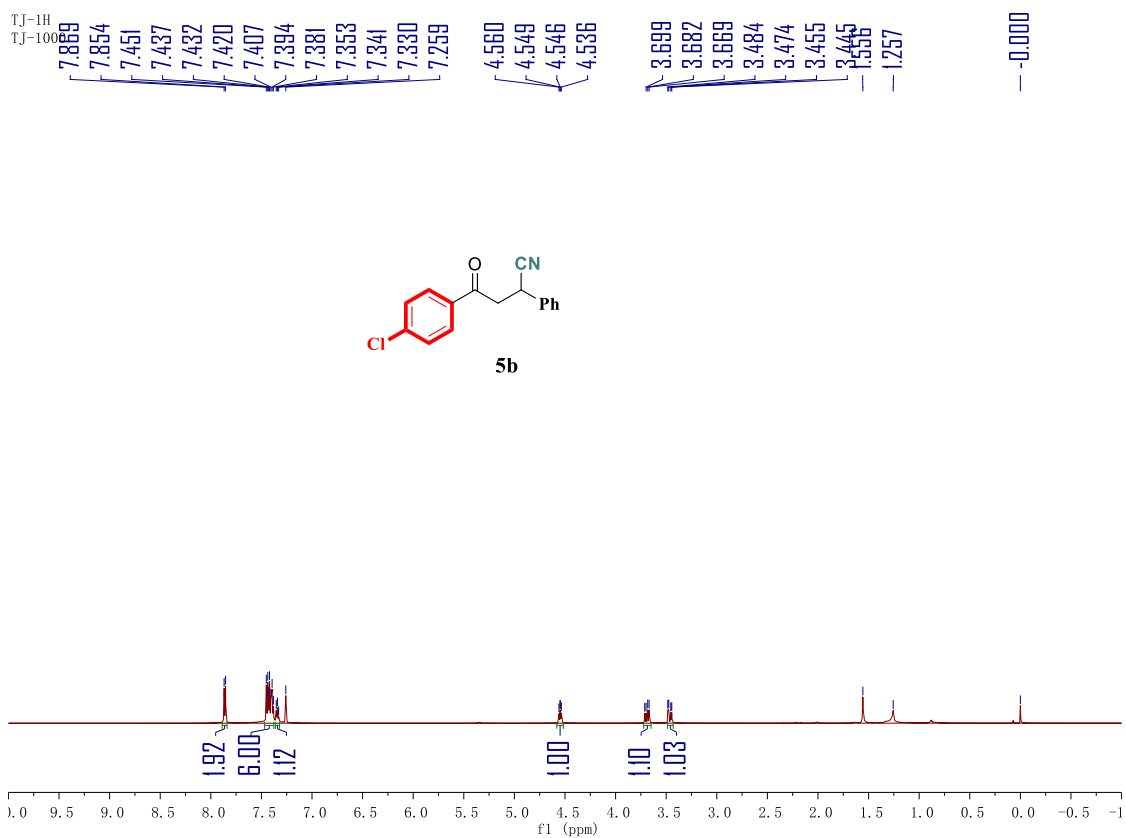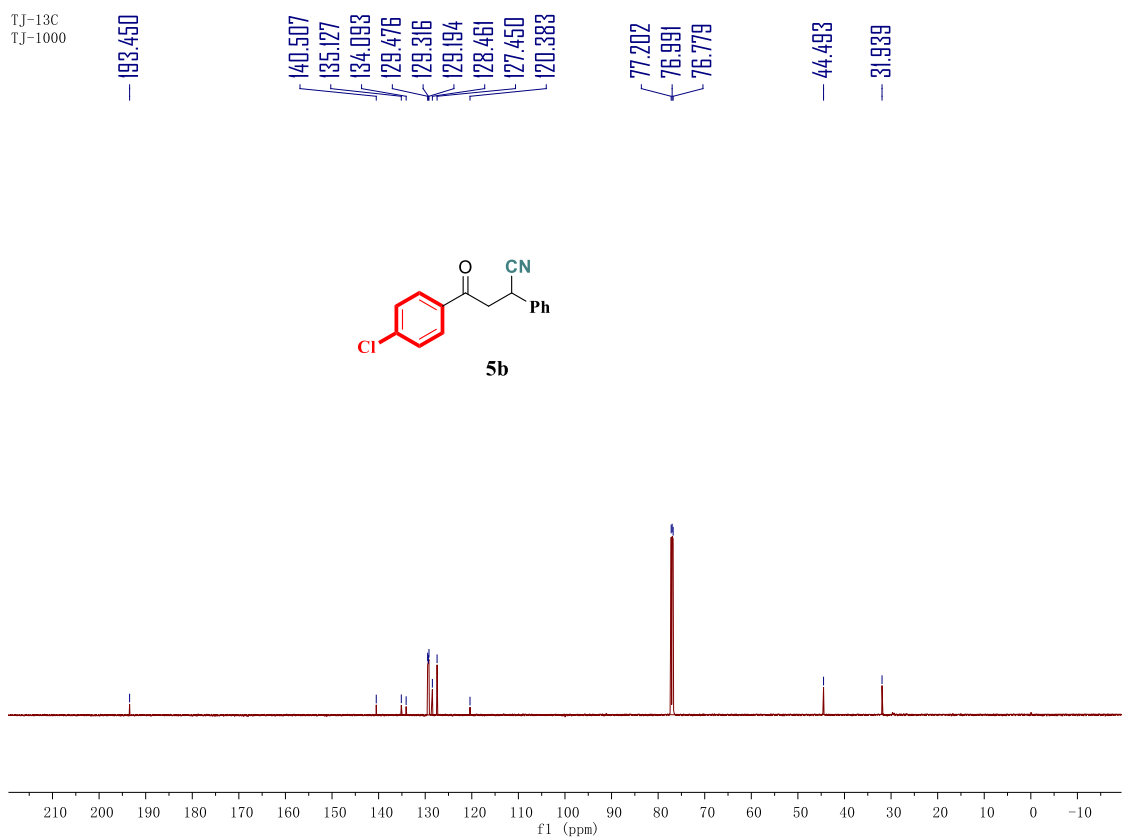

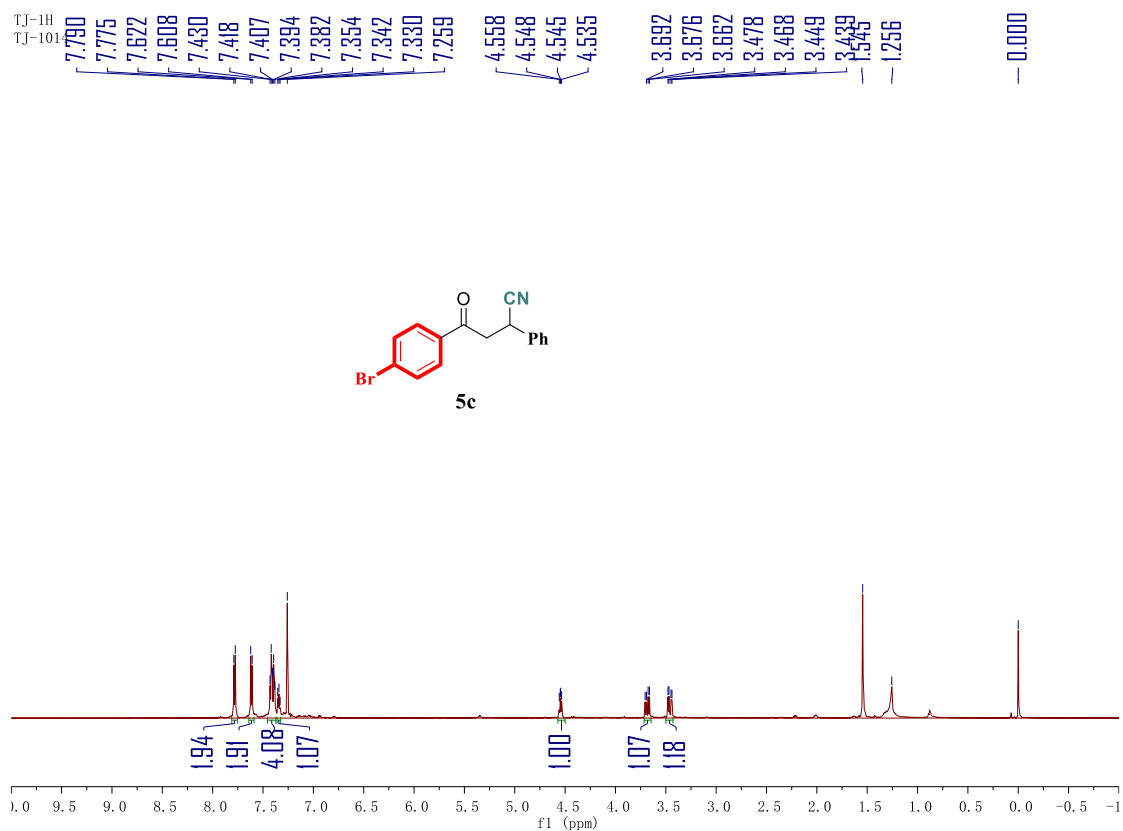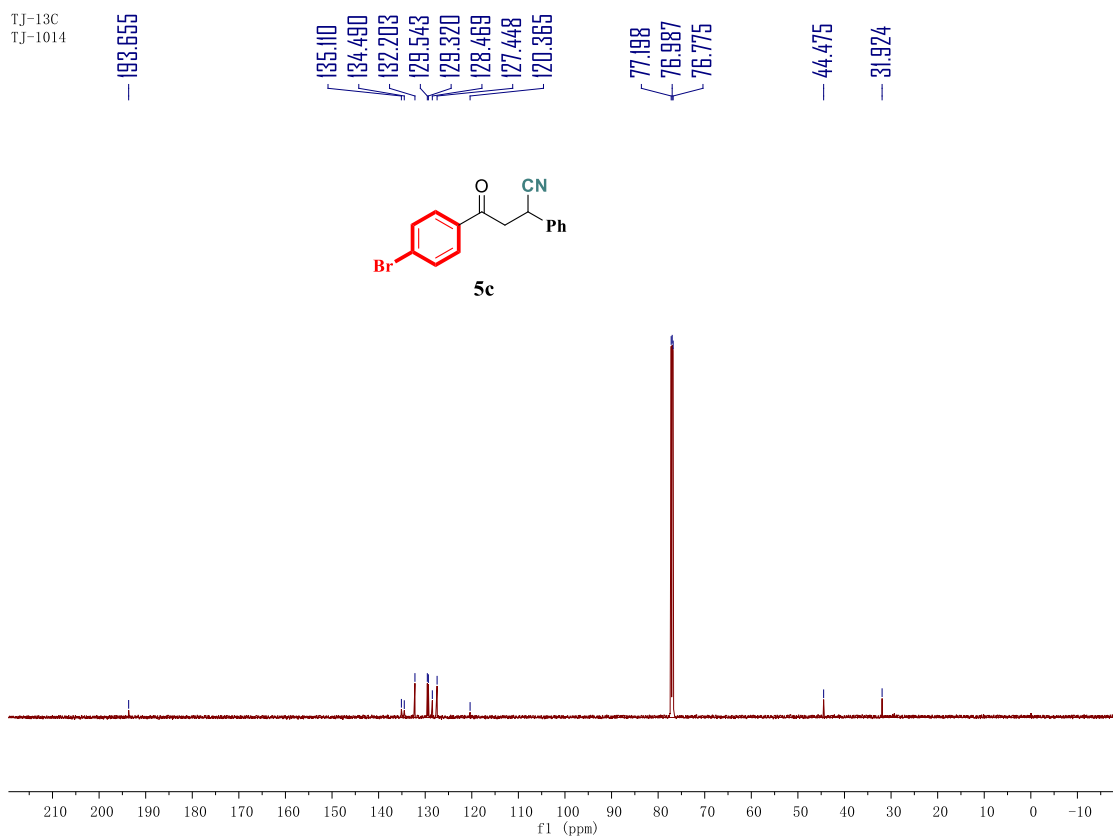

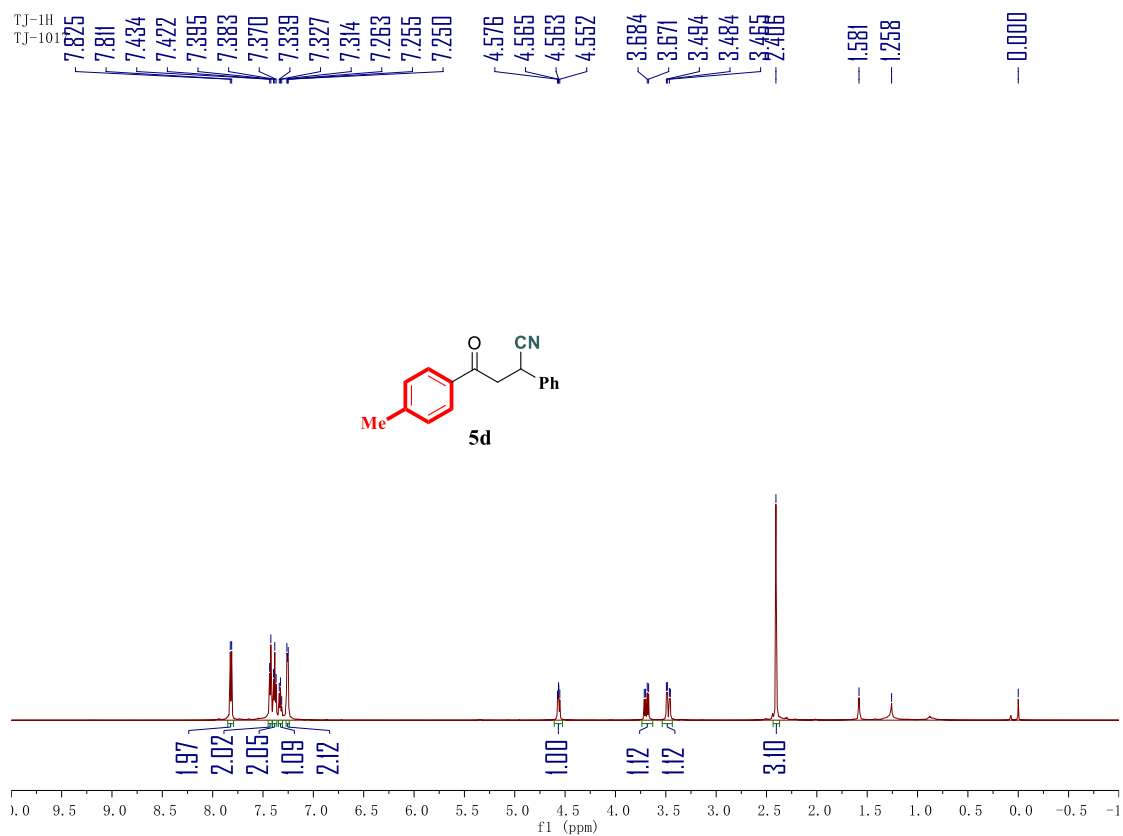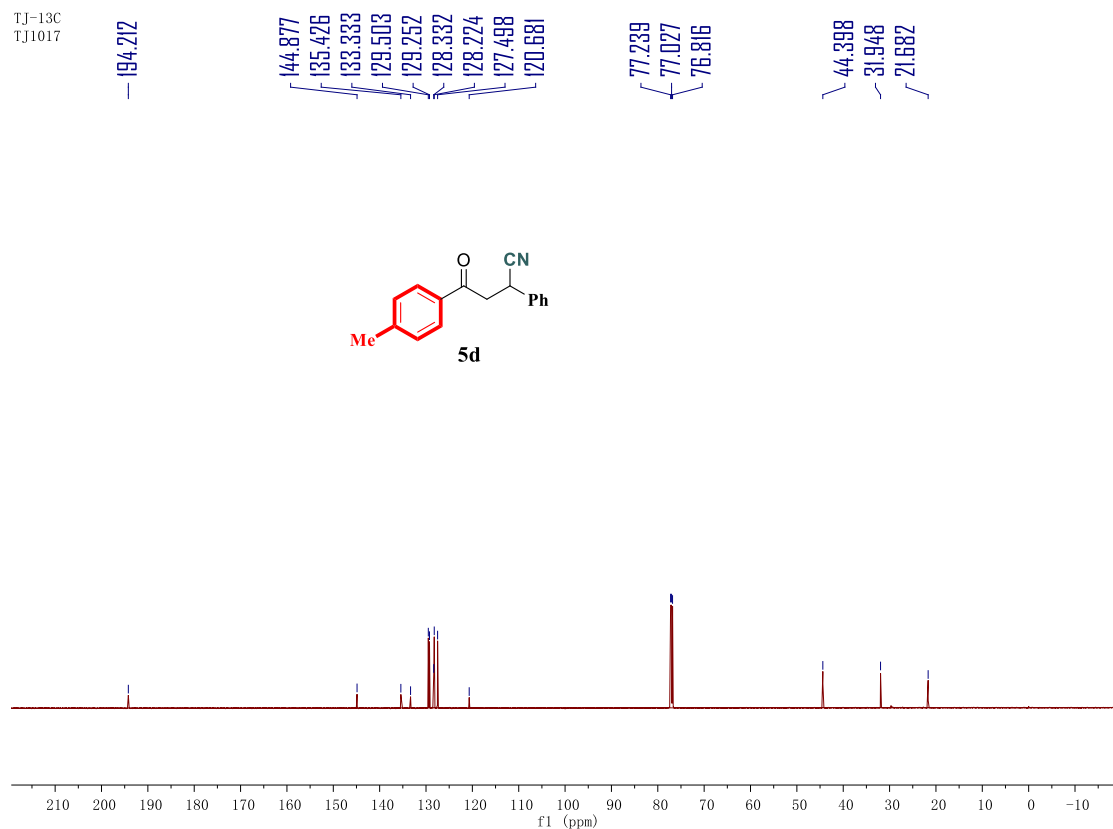



TJ-1H  
TJ-1022

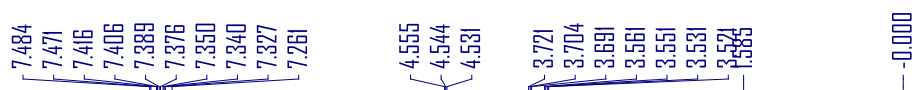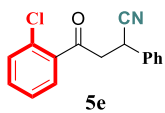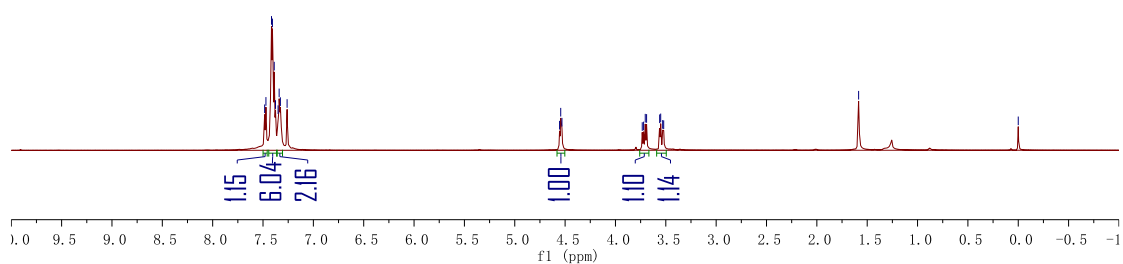

TJ-13C  
TJ-1022

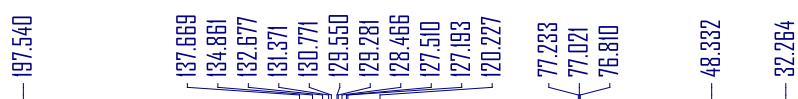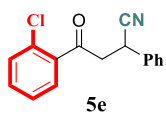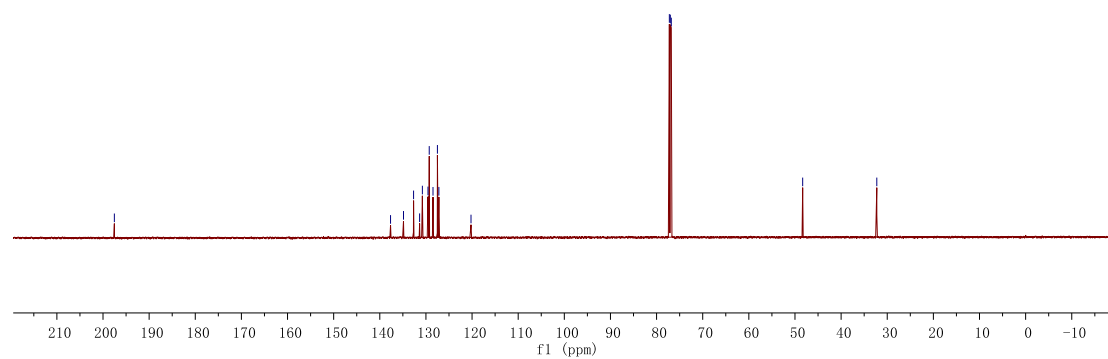

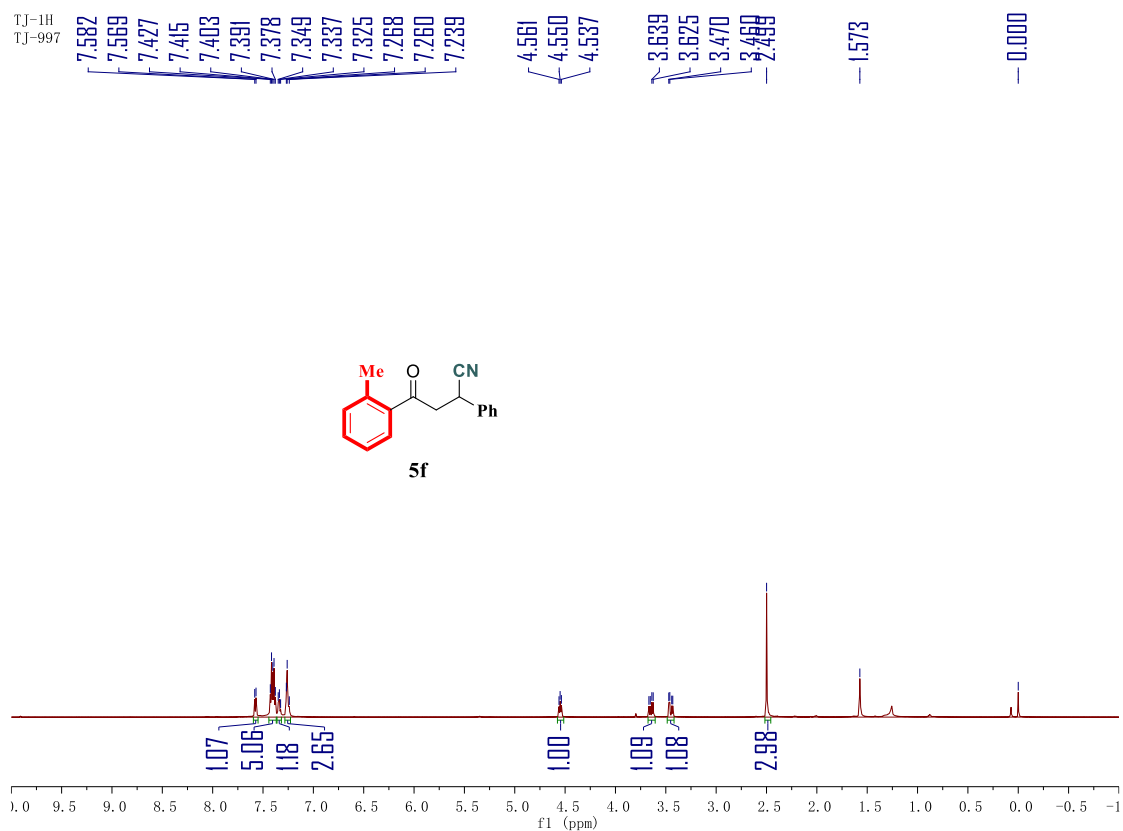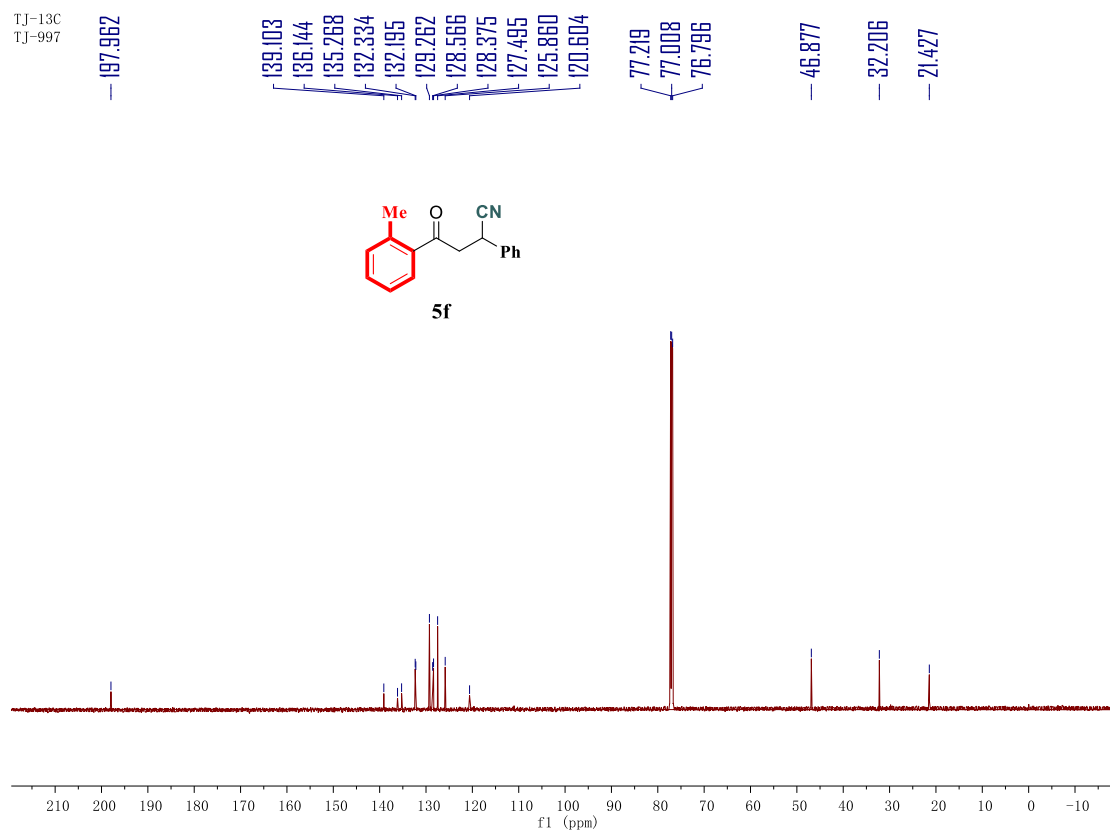

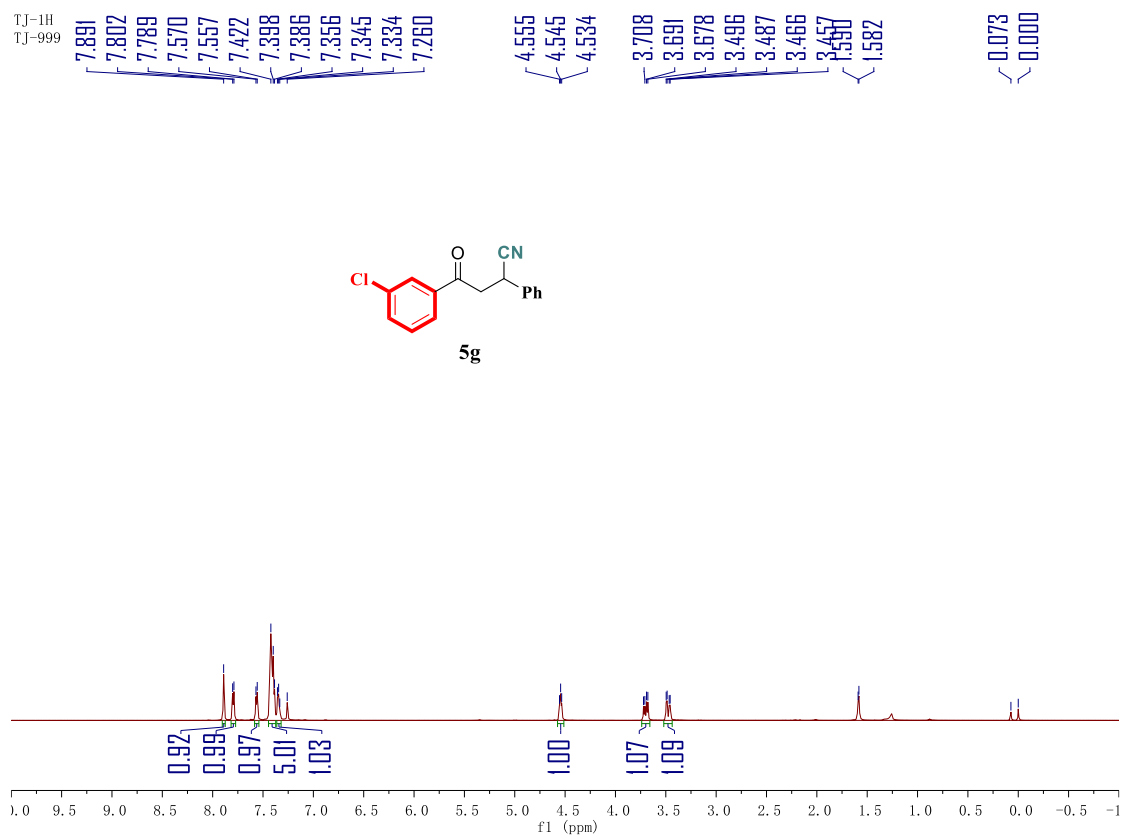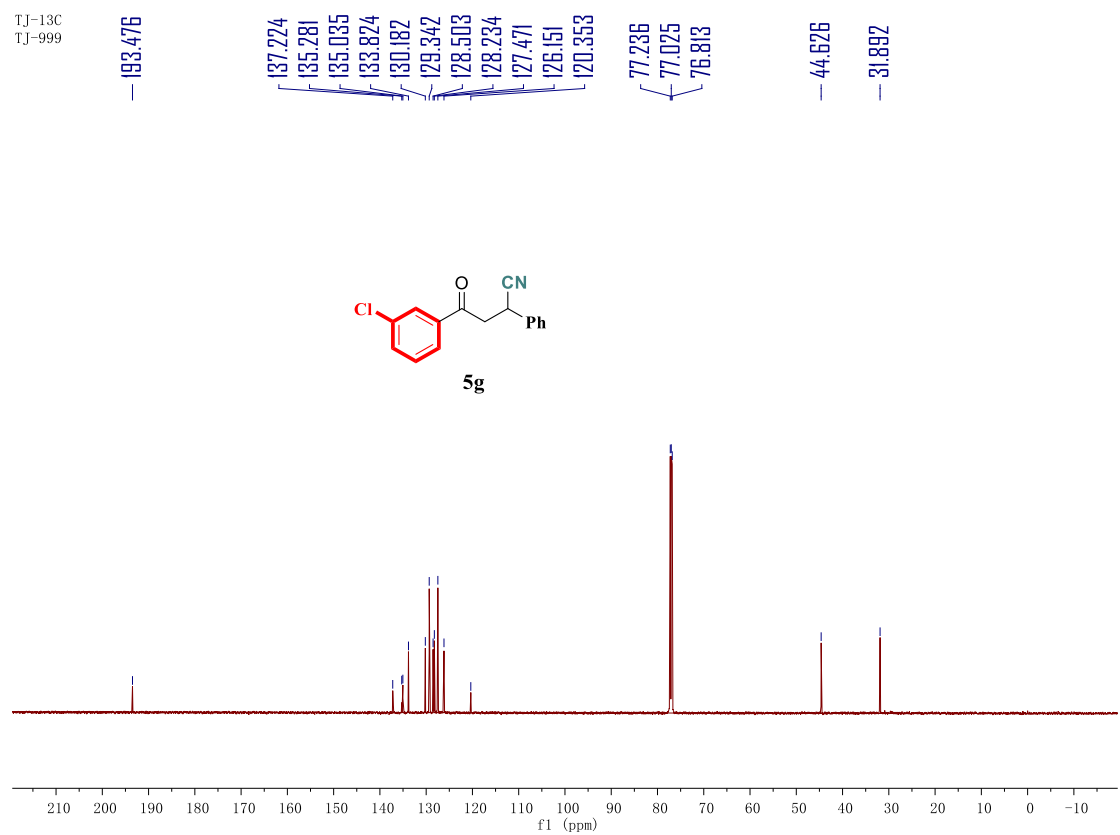

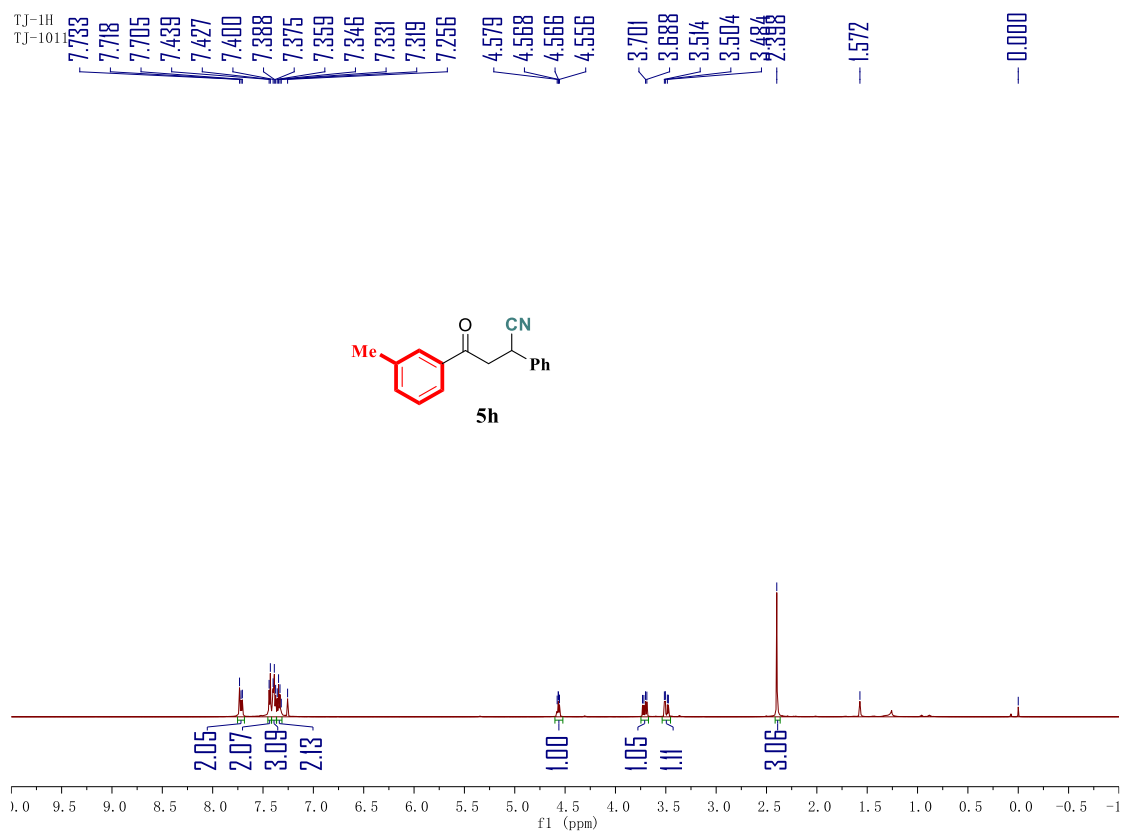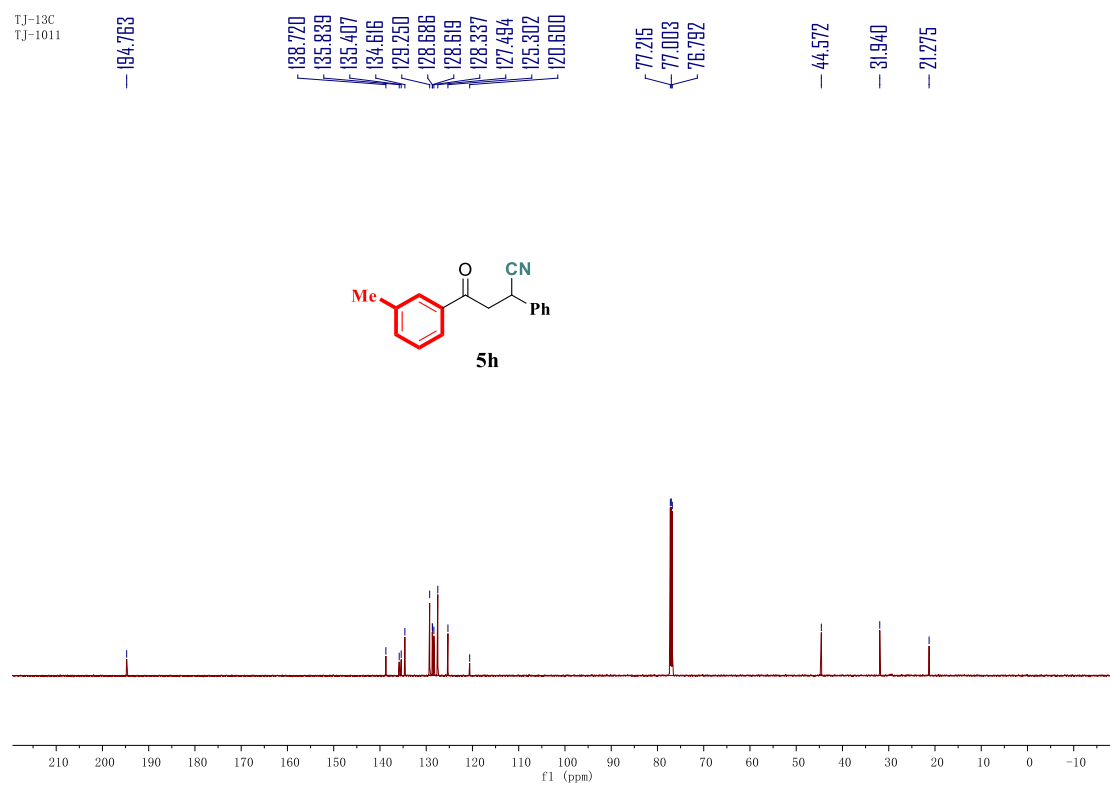

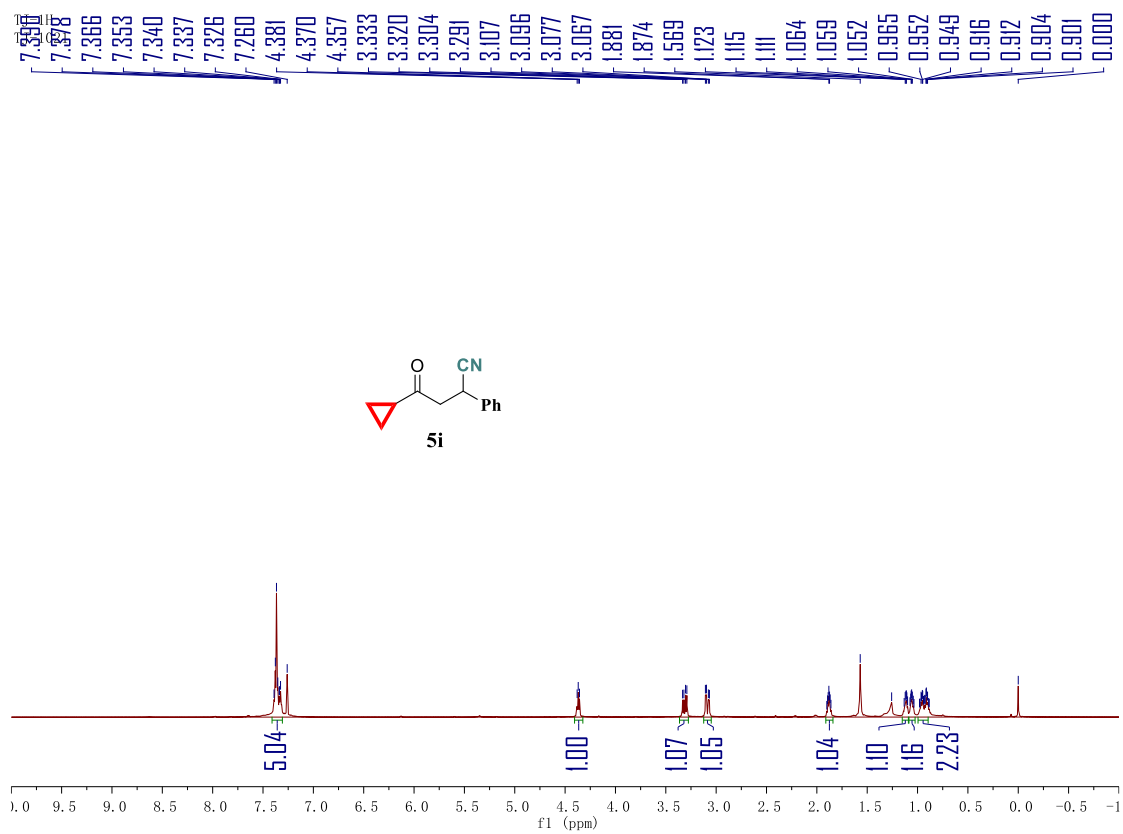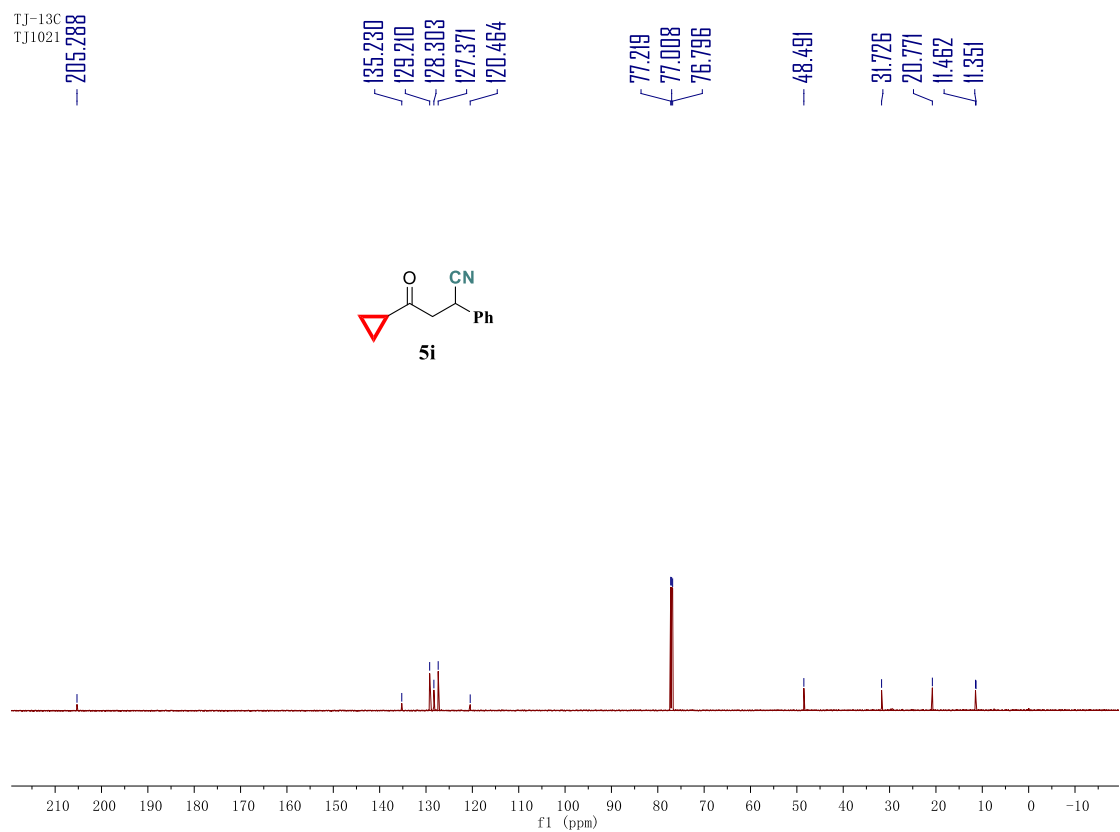

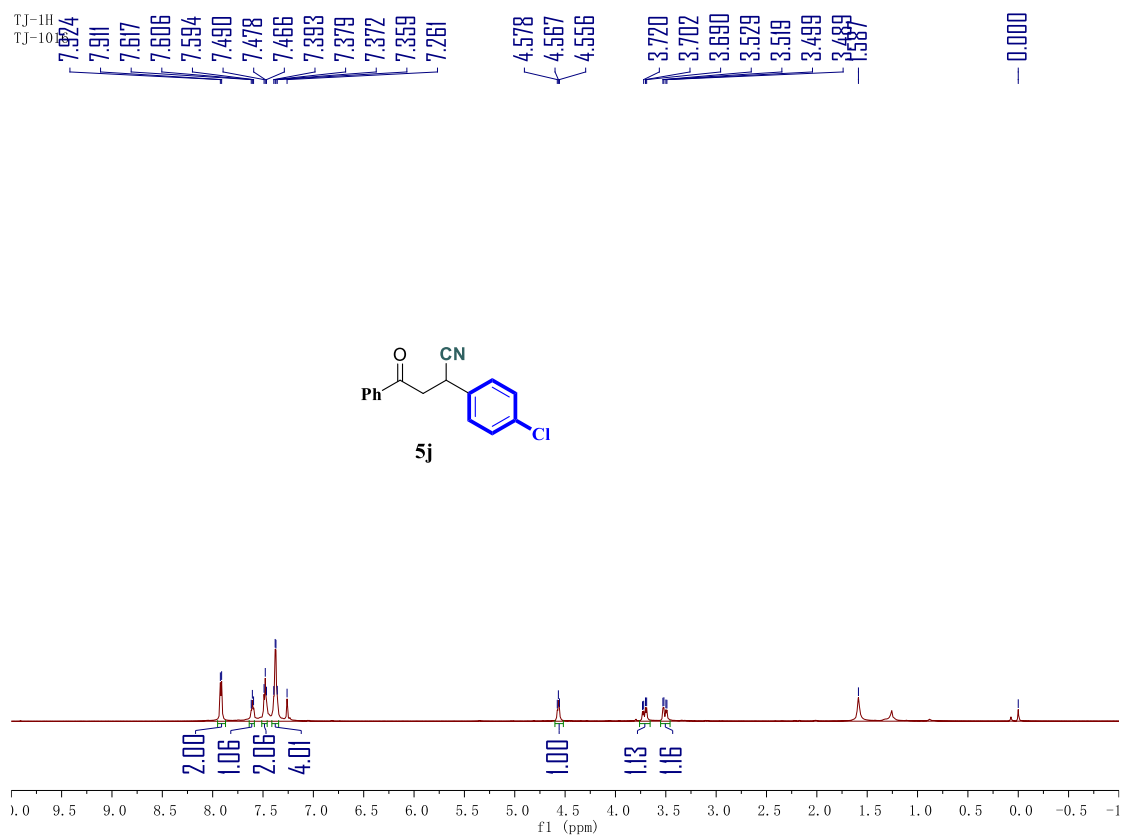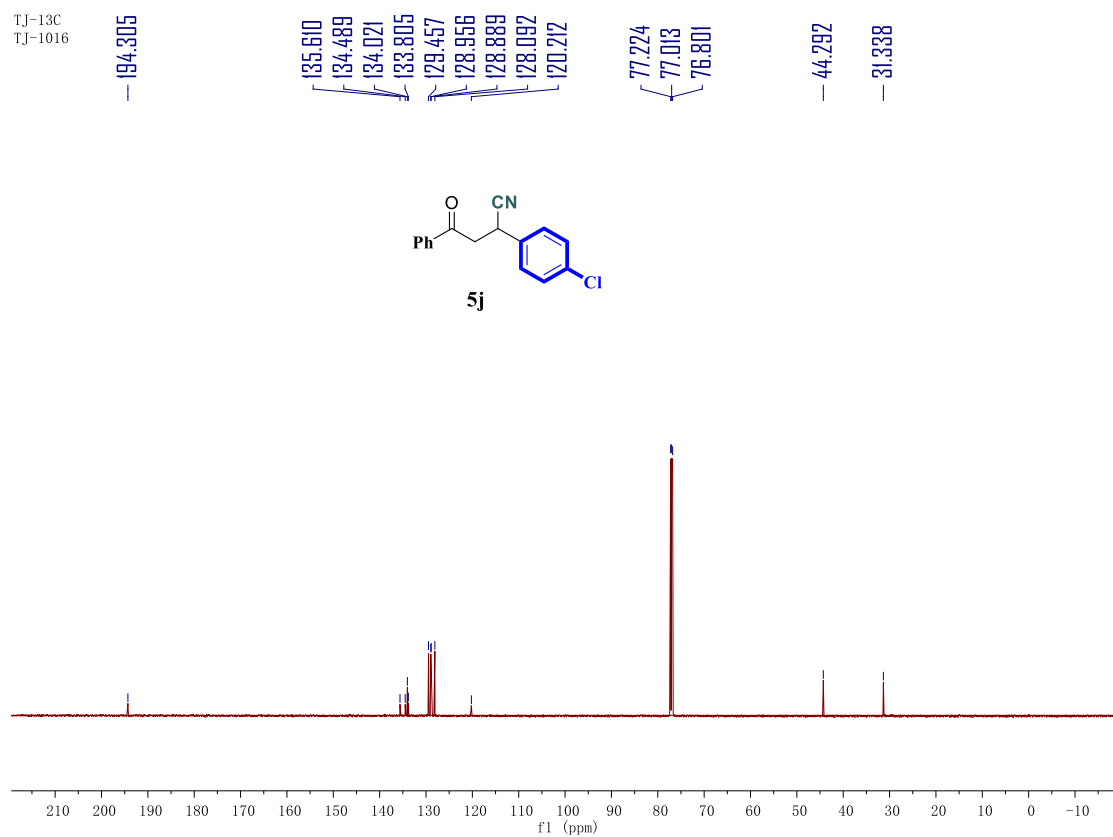

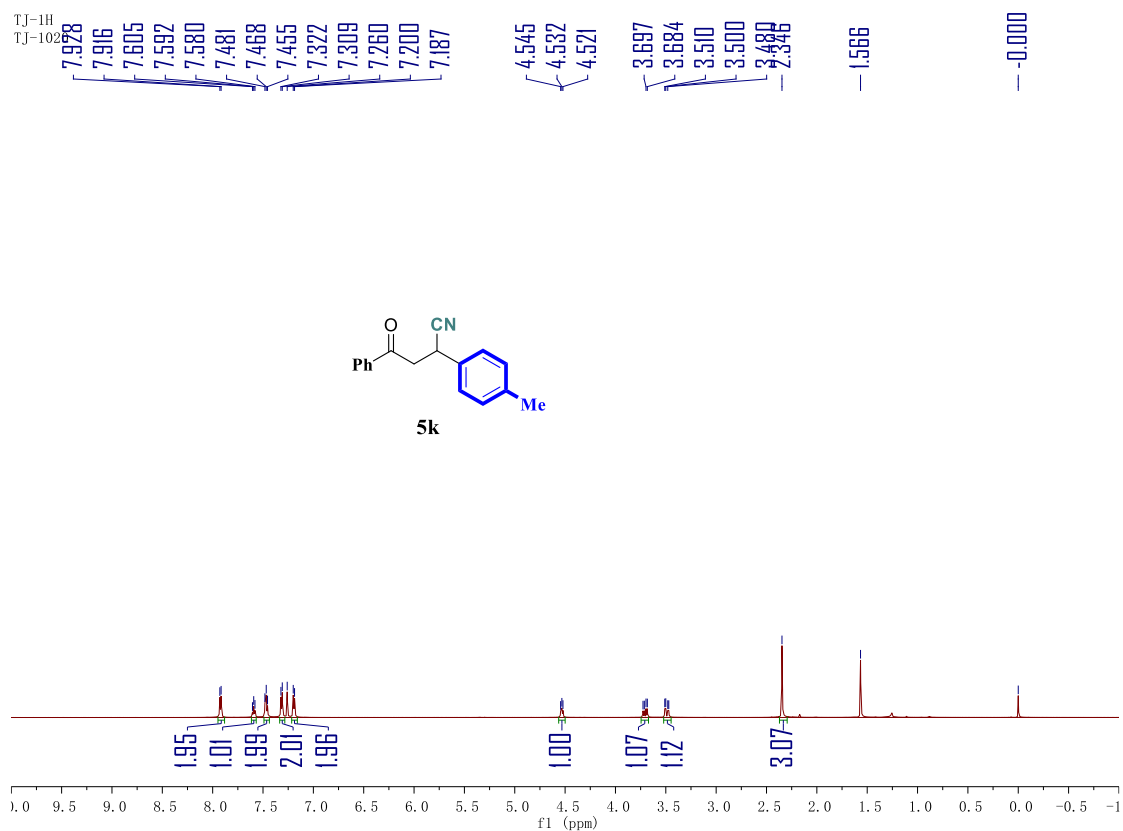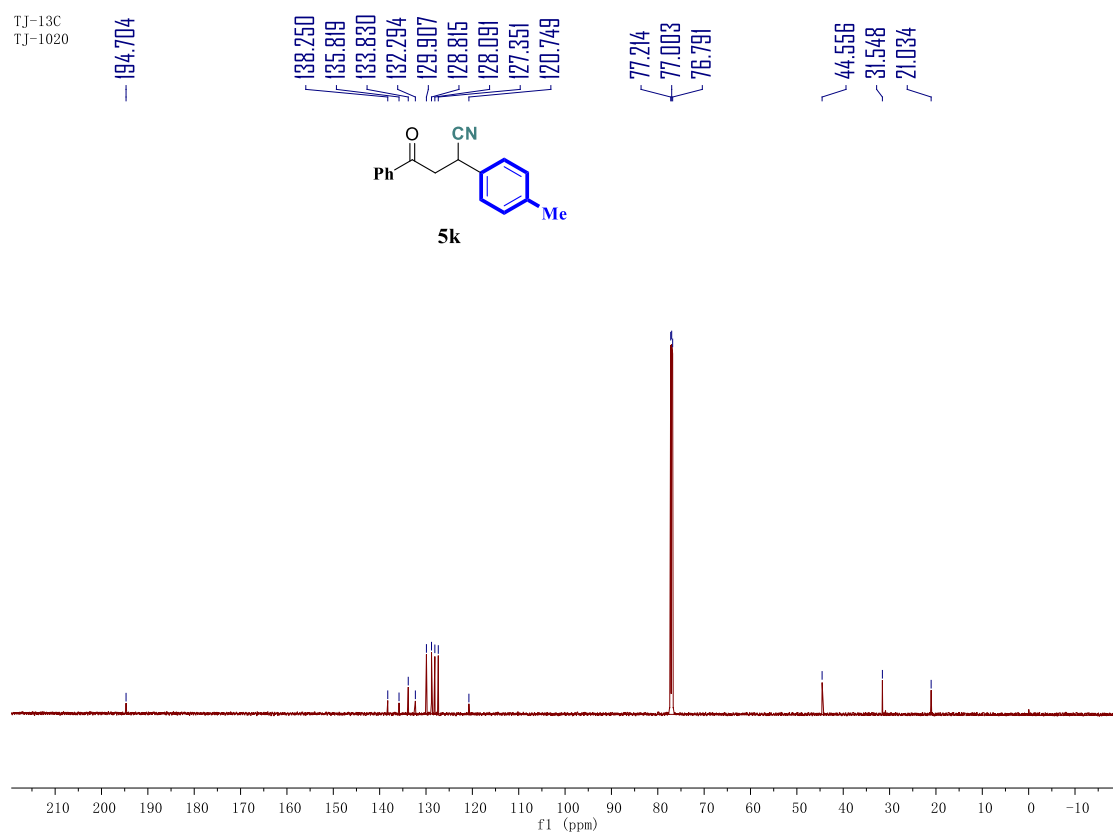

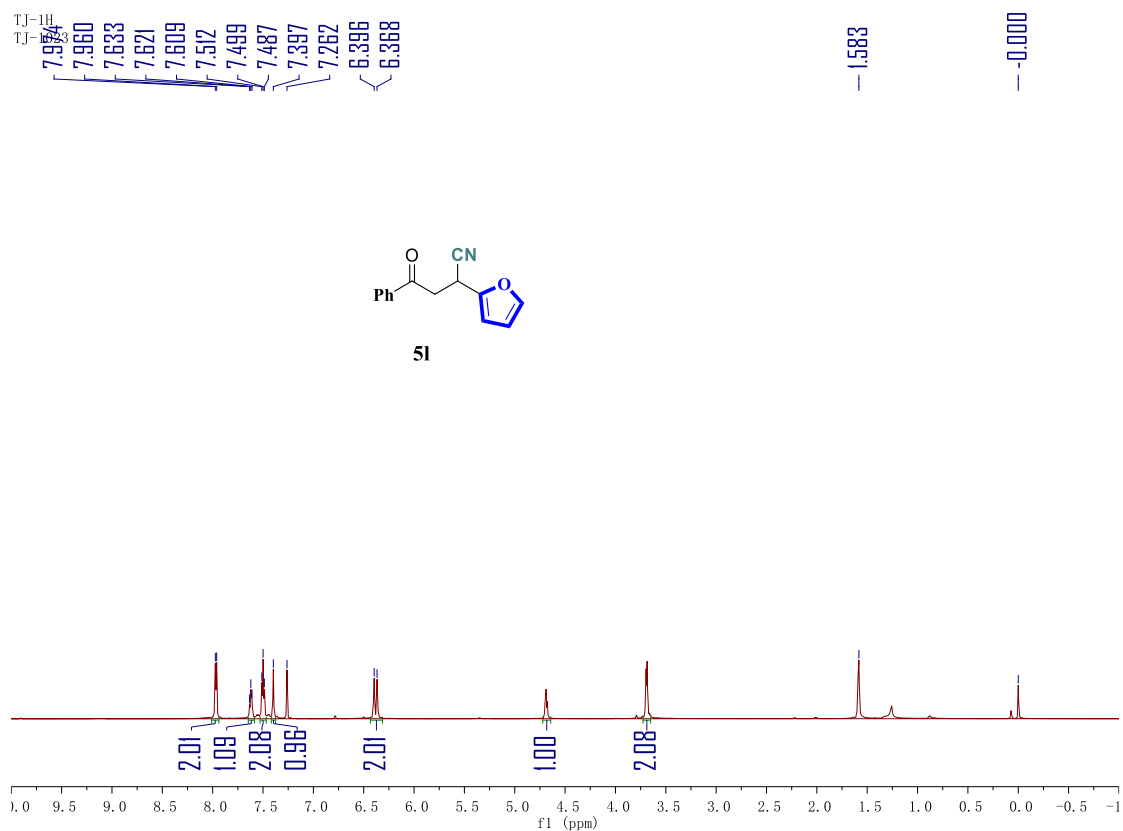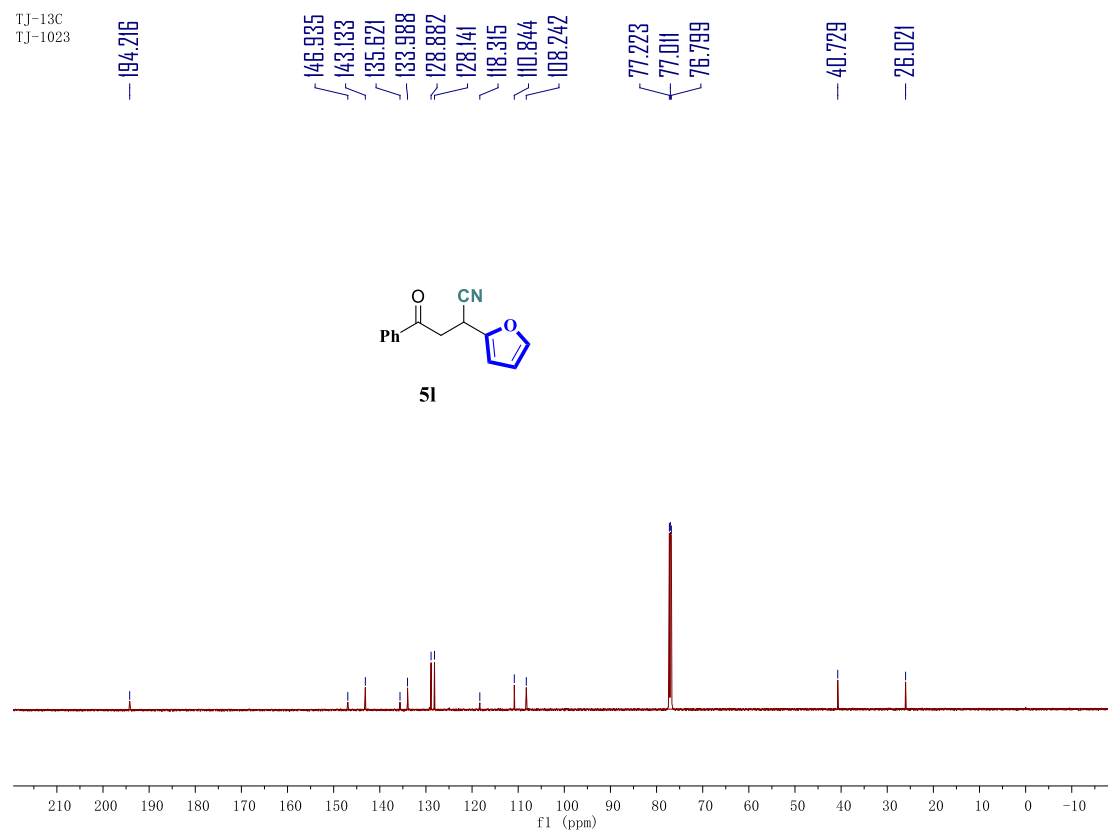



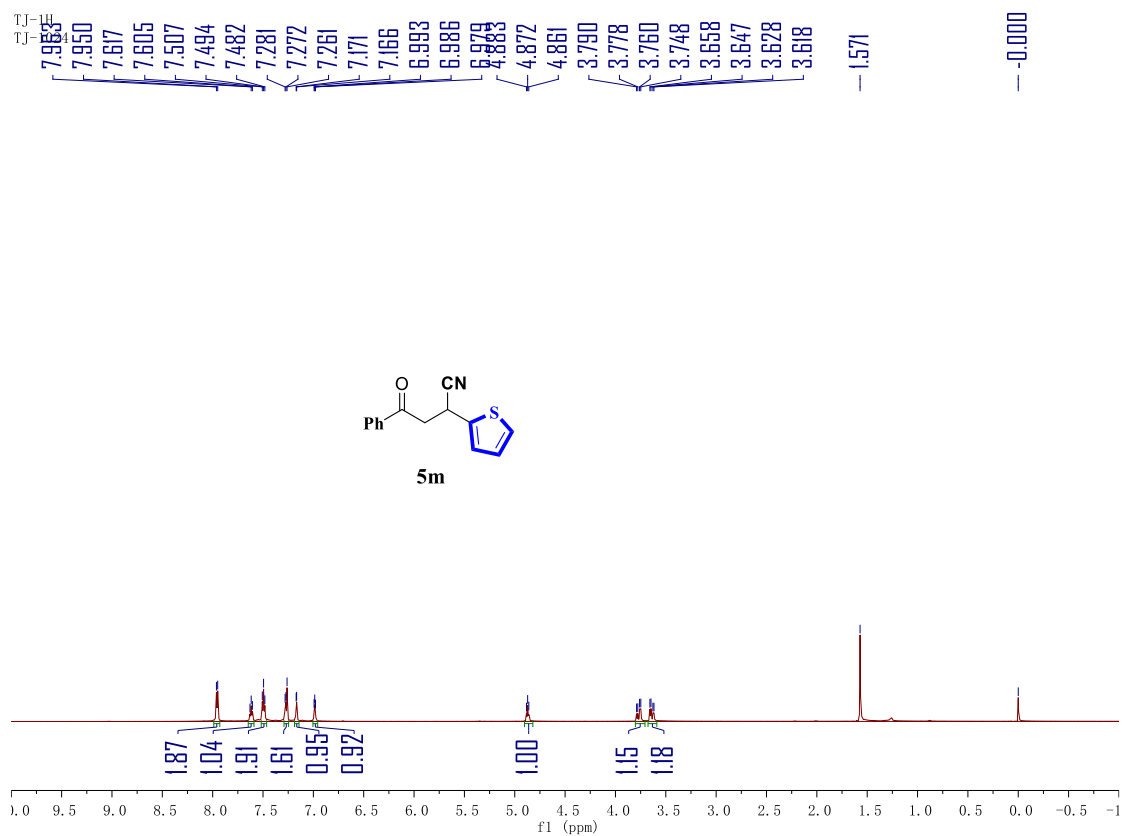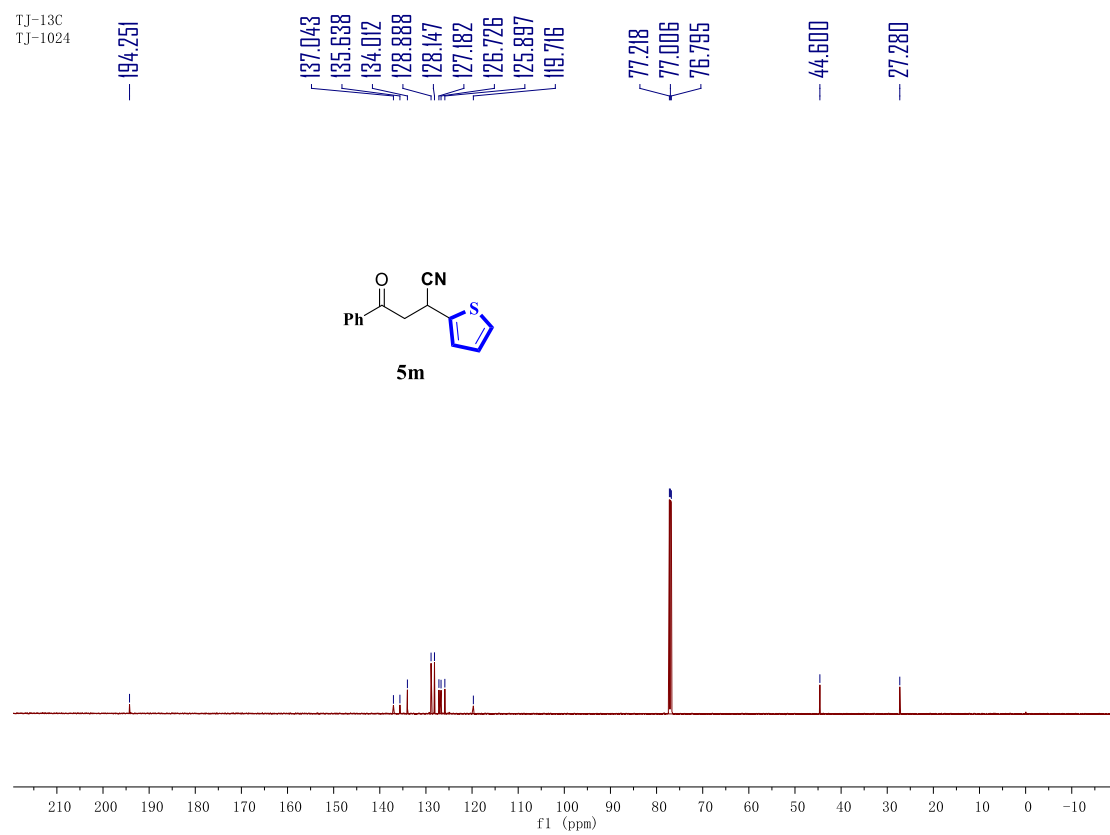

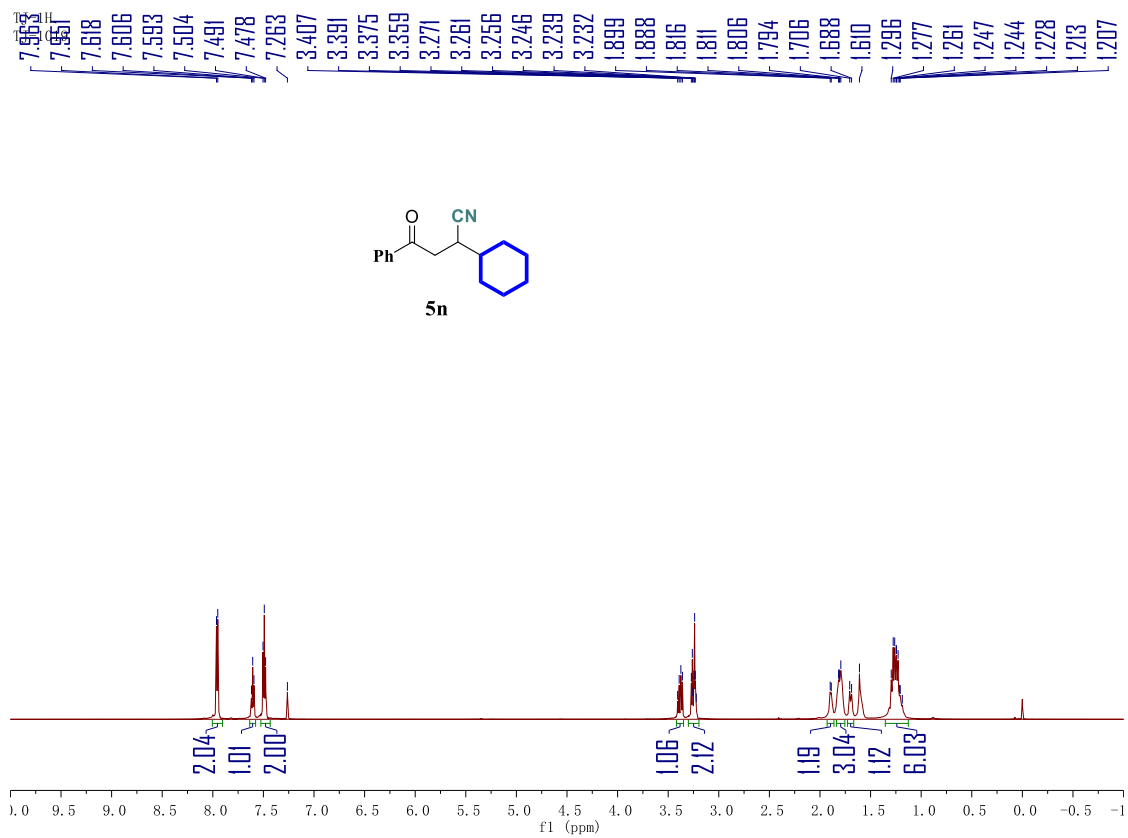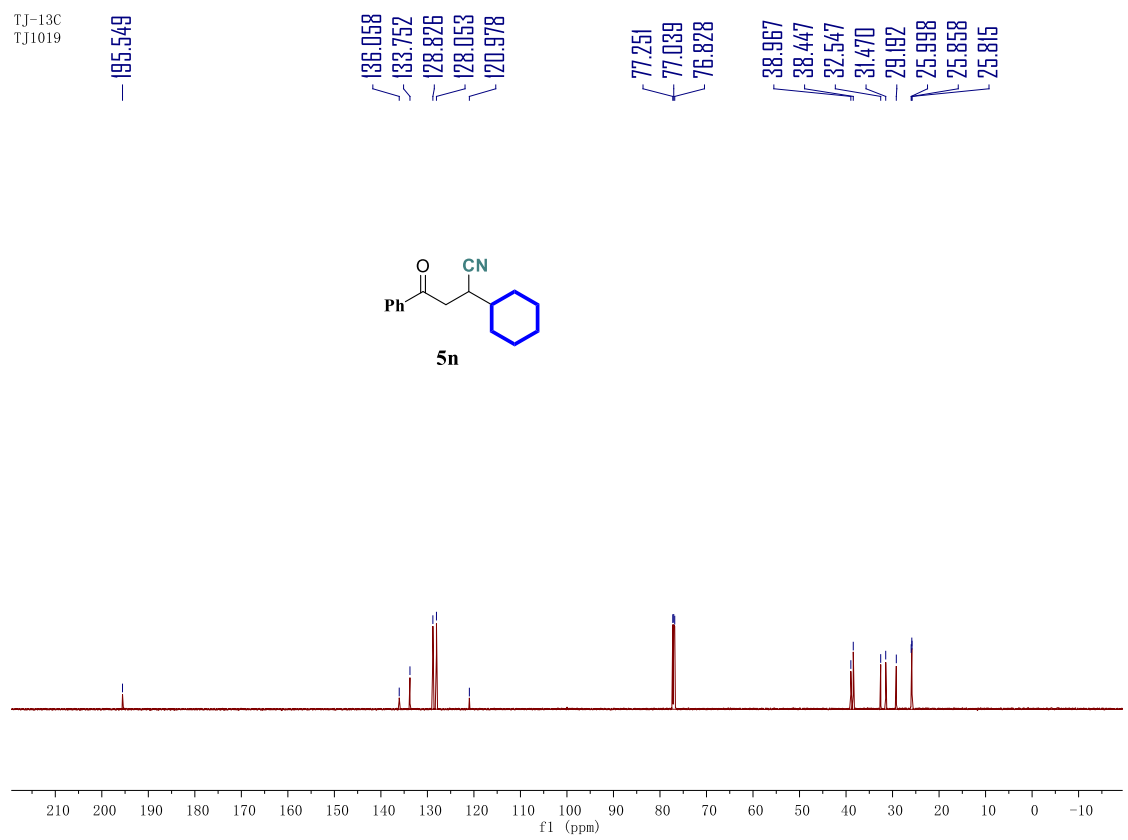

TJ-1060

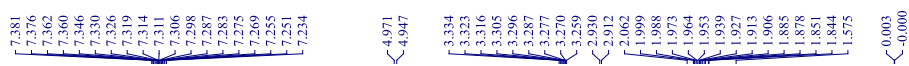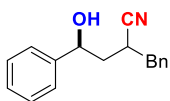

6

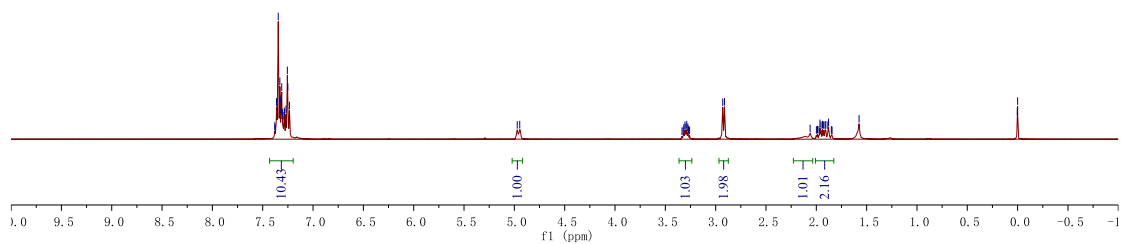

TJ-1060

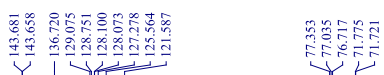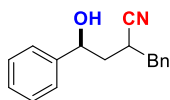

6

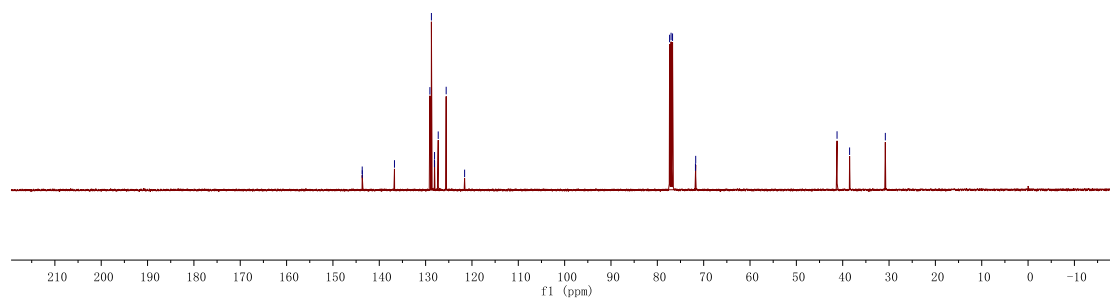

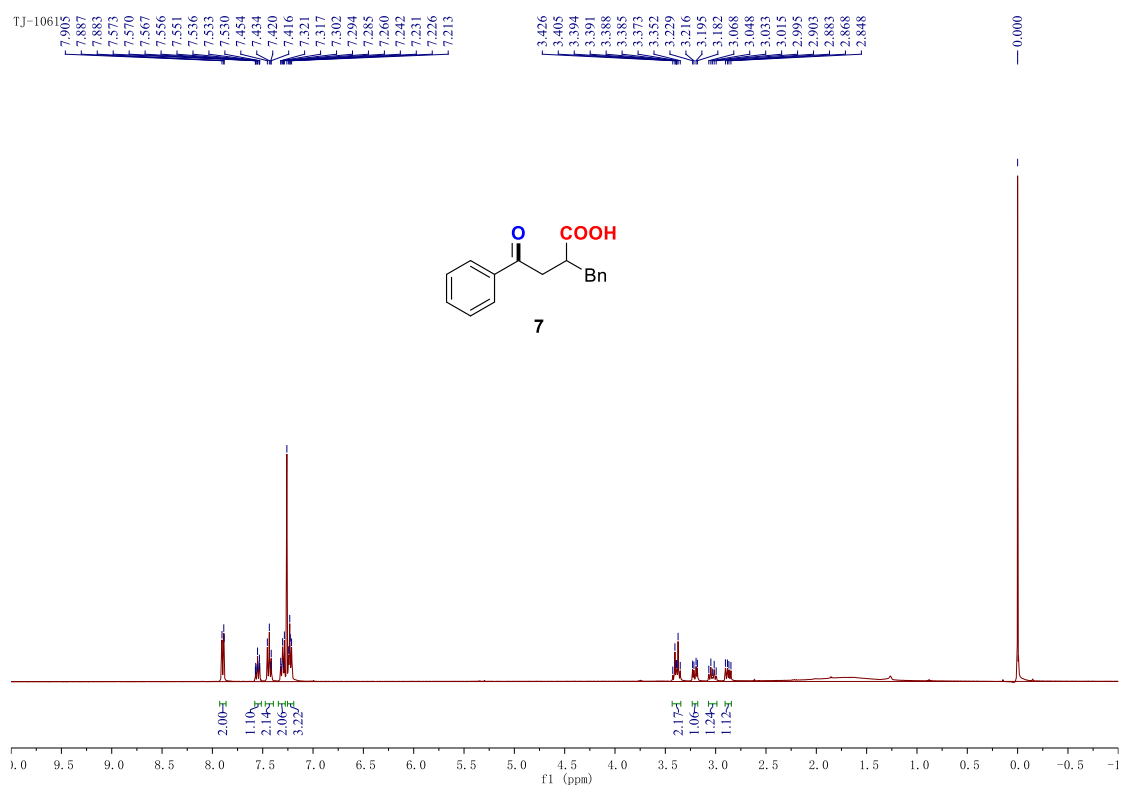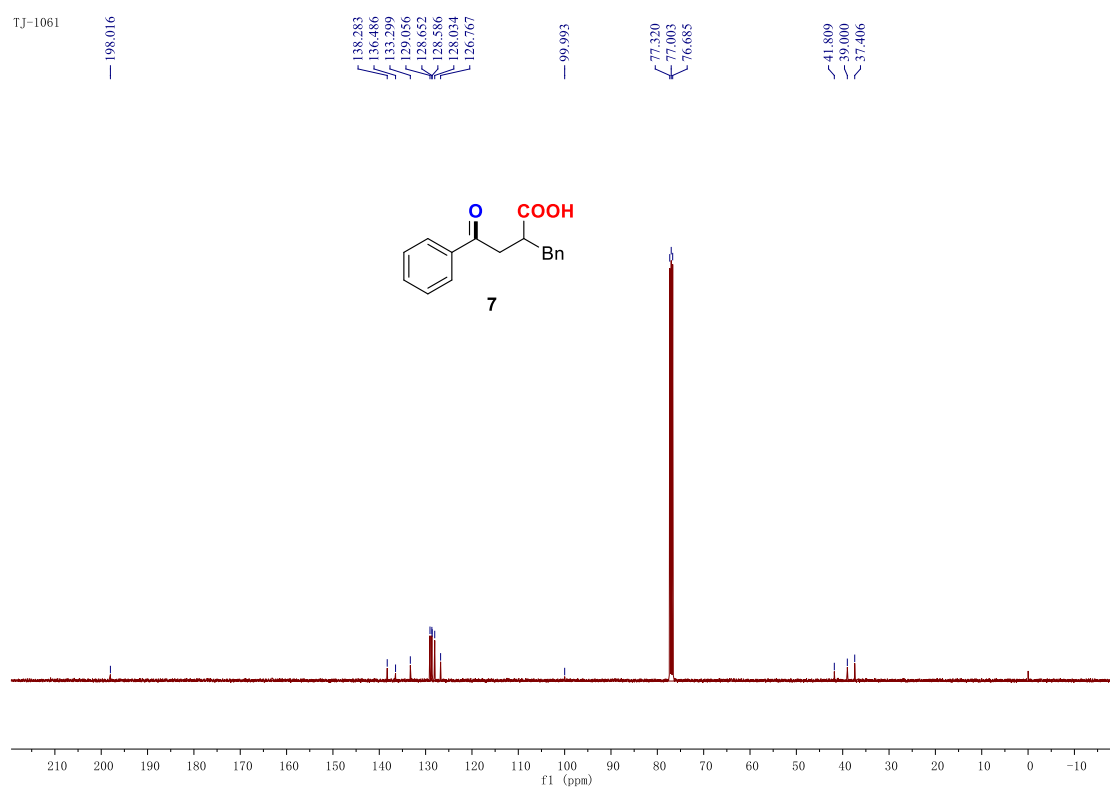

Supplement: d1qo00181g1.pdf [file d1qo00181g1.pdf]
